# Supplementary material
Source: publisher figshare collection journal article supplement (https://springernature.figshare.com/ndownloader/files/12384059)
Supplement: Supplementary file 1 [file 12384059]

#NEXUS
begin trees;
	tree tree_1 = [&R] (((Polyodon_spathula:50.7052,Psephurus_gladius:50.7052):79.8124,((((Scaphirhynchus_albus:1.44059,(Scaphirhynchus_platorynchus:0.821288,Scaphirhynchus_suttkusi:0.821288):0.619303):34.8451,(Huso_huso:21.7115,(((Acipenser_dabryanus:12.6082,Acipenser_nudiventris:12.6082):3.85196,(Acipenser_ruthenus:11.2048,(((Acipenser_gueldenstaedtii:1.30457,(Acipenser_naccarii:0.950067,Acipenser_persicus:0.950067):0.354503):2.6216,Acipenser_baerii_baerii:3.92617):4.81026,(Acipenser_brevirostrum:7.18411,Acipenser_fulvescens:7.18411):1.55232):2.46835):5.25533):0.888675,(Acipenser_stellatus:4.02784,(Pseudoscaphirhynchus_hermanni:0.807494,Pseudoscaphirhynchus_kaufmanni:0.807494):3.22035):13.3209):4.36275):14.5742):12.7375,((Acipenser_sinensis:13.7873,(Acipenser_schrenckii:9.66316,Acipenser_transmontanus:9.66316):4.12411):6.95987,((Acipenser_medirostris:1.98114,Acipenser_mikadoi:1.98114):9.46555,Huso_dauricus:11.4467):9.30046):28.2761):24.9767,(Acipenser_oxyrinchus_oxyrinchus:19.6585,Acipenser_sturio:19.6585):54.3415):56.5176):214.482,(((((((Chitala_chitala:33.8822,Chitala_ornata:33.8822):17.08,Notopterus_notopterus:50.9622):42.0943,Xenomystus_nigri:93.0565):18.9435,((((Arapaima_gigas:43.9231,Heterotis_niloticus:43.9231):14.6171,(Scleropages_formosus:41.6145,((Scleropages_jardinii:24.8534,Scleropages_leichardti:24.8534):8.12769,(Osteoglossum_bicirrhosum:7.73425,Osteoglossum_ferreirai:7.73425):25.2469):8.63335):16.9258):13.3605,Pantodon_buchholzi:71.9008):8.43656,(Gymnarchus_niloticus:60.028,((Myomyrus_macrops:25.8946,(((Mormyrops_nigricans:6.42265,Mormyrops_masuianus:6.42265):2.16947,Oxymormyrus_zanclirostris:8.59213):12.45137,(((((Marcusenius_ntemensis:9.96066,((Paramormyrops_gabonensis:1.70082,Paramormyrops_hopkinsi:1.70082):1.50045,(Paramormyrops_curvifrons:0.724075,Paramormyrops_longicaudatus:0.724075):2.4772):6.75939):4.87047,(Brienomyrus_niger:12.5342,((Pollimyrus_marchei:1.16161,Ivindomyrus_opdenboschi:1.16161):7.51706,Boulengeromyrus_knoepffleri:8.67867):3.8555):2.29696):0.930995,((((Marcusenius_devosi:5.97624,(Marcusenius_senegalensis_senegalensis:5.37792,(Marcusenius_altisambesi:3.86192,Marcusenius_macrolepidotus:3.86192):1.516):0.598327):5.33761,((Hippopotamyrus_discorhynchus:0.707437,Hippopotamyrus_wilverthi:0.707437):9.22275,((Marcusenius_moorii:7.4595,((((Campylomormyrus_elephas:3.20583,(Campylomormyrus_tshokwe:1.42551,(Campylomormyrus_numenius:0.886821,(Campylomormyrus_curvirostris:0.475691,Campylomormyrus_rhynchophorus:0.475691):0.41113):0.53869):1.78032):0.976895,Campylomormyrus_tamandua:4.18272):0.563743,Gnathonemus_petersii:4.74647,Gnathonemus_longibarbis:4.74647):2.22955,Genyomyrus_donnyi:6.97601):0.483488):1.72151,Marcusenius_greshoffii:9.18101):0.749176):1.38367):1.31029,(Hippopotamyrus_longilateralis:4.45114,(Hippopotamyrus_ansorgii:0.756856,Hippopotamyrus_szaboi:0.756856):3.69428):8.17301):2.55729,Hyperopisus_bebe_bebe:15.1814):0.580685):2.3745,((Brienomyrus_brachyistius:13.0309,Hippopotamyrus_pictus:13.0309):3.9834,(Isichthys_henryi:15.3296,(Mormyrus_ovis:9.10628,Mormyrus_kannume:9.10628):6.2233):1.68472):1.12232):0.664622,(((Pollimyrus_adspersus:3.3536,Pollimyrus_petricolus:3.3536):0.152691,Pollimyrus_isidori_isidori:3.50629):7.92891,(Pollimyrus_castelnaui:0.519729,Pollimyrus_marianne:0.519729):10.9155):7.36604):2.24224):4.85111):9.02152,((((Petrocephalus_catostoma:5.53906,(Petrocephalus_sullivani:4.66063,(Petrocephalus_christyi:3.78197,Petrocephalus_sauvagii:3.78197):0.878665):0.878425):7.4802,(Petrocephalus_bovei_bovei:12.521,(Petrocephalus_pallidomaculatus:9.54886,Petrocephalus_soudanensis:9.54886):2.97211):0.49829):2.6419,(Petrocephalus_simus:13.3399,(Petrocephalus_balayi:6.76653,Petrocephalus_binotatus:6.76653):6.57341):2.32122):8.93619,Petrocephalus_microphthalmus:24.5974):10.3188):25.1119):20.3093):31.6627):52.2382,Hiodon_alosoides:164.238):55.0148,((((((((((Barbourisia_rufa:91.1788,(((((Gephyroberyx_darwinii:19.2327,Diretmus_argenteus:19.2327):5.52559,Anoplogaster_cornuta:24.7583):5.21129,(Monocentris_japonica:29.5458,(Hoplostethus_atlanticus:17.6384,Hoplostethus_mediterraneus:17.6384):11.9074):0.423765):12.4705,Photoblepharon_palpebratum:42.44):5.03042,Aulotrachichthys_prosthemius:47.4705):43.7084):42.6071,((Melamphaes_suborbitalis:64.9902,(((((Melamphaes_lugubris:0.162446,Melamphaes_parvus:0.162446):24.843,Poromitra_crassiceps:25.0054):0.145919,(Scopelogadus_mizolepis_bispinosus:18.704,Scopelogadus_beanii:18.704):6.44735):16.0235,Sio_nordenskjoldii:41.1749):23.6161,(((Centroberyx_lineatus:12.6189,(Centroberyx_australis:8.0795,Centroberyx_gerrardi:8.0795):4.53936):7.2145,Centroberyx_affinis:19.8334):4.08343,(Beryx_decadactylus:12.947,(Beryx_mollis:4.50052,Beryx_splendens:4.50052):8.44647):10.9698):40.8742):0.199277):66.8479,((Scopeloberyx_robustus:100.629,((Myripristis_jacobus:17.3395,(Myripristis_violacea:8.00651,Myripristis_berndti:8.00651):9.33296):49.798,((Myripristis_botche:13.2137,Myripristis_kuntee:13.2137):29.5071,((Sargocentron_microstoma:12.386,(Sargocentron_diadema:10.3854,Sargocentron_xantherythrum:10.3854):2.0006):25.7135,((((Sargocentron_cornutum:23.7568,(Sargocentron_vexillarium:19.8498,Sargocentron_punctatissimum:19.8498):3.9069):2.56081,Sargocentron_caudimaculatum:26.3176):1.3943,(Sargocentron_coruscum:27.6109,(Neoniphon_sammara:13.3156,Neoniphon_argenteus:13.3156):14.2953):0.100951):5.56153,(Holocentrus_adscensionis:25.1817,(Neoniphon_aurolineatus:16.8064,(Sargocentron_spiniferum:2.98351,Sargocentron_tiere:2.98351):13.8229):8.37532):8.0917):4.8262):4.62116):24.4167):33.4914):28.6735,((((((Cataetyx_rubrirostris:34.329,Brosmophycis_marginata:34.329):34.3308,Diancistrus_fuscus:68.6598):0.272701,Cataetyx_laticeps:68.9325):30.8018,(Brotula_barbata:88.6704,((Genypterus_maculatus:83.5459,(Ophidion_scrippsae:52.9296,(((Genypterus_blacodes:17.426,Genypterus_capensis:17.426):18.502,Chilara_taylori:35.9281):4.2346,Lepophidium_profundorum:40.1627):12.7669):30.6163):3.73888,((Brotula_multibarbata:85.2221,Lamprogrammus_shcherbachevi:85.2221):0.129057,((Brotulotaenia_nigra:33.0156,Neobythites_stigmosus:33.0156):19.5422,Petrotyx_sanguineus:52.5578):32.7934):1.93355):1.38564):11.0639):4.41928,(Carapus_boraborensis:48.8869,Echiodon_drummondii:48.8869):55.2666):19.0897,((((((Latridopsis_ciliaris:6.32054,Latridopsis_forsteri:6.32054):14.0286,(Latris_lineata:17.9956,Mendosoma_lineatum:17.9956):2.35354):69.3888,((((((Stromateus_stellatus:22.1995,(Peprilus_medius:7.80901,Peprilus_simillimus:7.80901):14.3905):4.79785,Peprilus_triacanthus:26.9974):30.7813,((Pampus_minor:24.11,Pampus_argenteus:24.11):6.13067,((Pampus_cinereus:8.37067,Pampus_punctatissimus:8.37067):6.84687,Pampus_chinensis:15.2175):15.0231):27.538):0.200132,Stromateus_fiatola:57.9788):17.2429,(((((Schedophilus_medusophagus:10.4792,((Seriolella_caerulea:6.31901,Seriolella_brama:6.31901):2.99638,Seriolella_punctata:9.31539):1.1638):9.67308,((Schedophilus_velaini:11.8569,Hyperoglyphe_japonica:11.8569):2.80699,((Centrolophus_niger:8.94132,Icichthys_lockingtoni:8.94132):3.33748,Schedophilus_ovalis:12.2788):2.3851):5.48837):12.6228,Psenopsis_anomala:32.7751):24.0201,Pomatomus_saltatrix:56.7951):16.4622,(Scombrolabrax_heterolepis:71.6817,((((Tetragonurus_cuvieri:40.6231,Icosteus_aenigmaticus:40.6231):23.5665,(Gasterochisma_melampus:55.0,((((Allothunnus_fallai:25.0016,((Cybiosarda_elegans:19.2478,((Thunnus_alalunga:1.58451,Thunnus_thynnus:1.58451):3.63465,((Thunnus_atlanticus:2.92565,((Thunnus_albacares:1.38644,Thunnus_obesus:1.38644):1.39129,Thunnus_tonggol:2.77773):0.147923):0.487334,Thunnus_maccoyii:3.41298):1.80617):14.0287):3.03991,(Sarda_chiliensis:17.8469,((Katsuwonus_pelamis:6.62529,((Auxis_rochei_rochei:3.22862,Auxis_thazard_thazard:3.22862):2.54374,(Euthynnus_alletteratus:2.49663,Euthynnus_affinis:2.49663):3.27574):0.852931):7.62688,((Sarda_australis:5.45267,Sarda_orientalis:5.45267):5.34617,Sarda_sarda:10.7988):3.45334):3.59467):4.44086):2.71385):5.98511,(Gymnosarda_unicolor:21.1737,Acanthocybium_solandri:21.1737):9.81295):13.1046,(((((Scomberomorus_sierra:6.66221,Scomberomorus_tritor:6.66221):12.2333,(Scomberomorus_cavalla:11.0537,(Scomberomorus_maculatus:2.26396,(Scomberomorus_brasiliensis:0.055071,Scomberomorus_regalis:0.055071):2.20889):8.78975):7.84185):4.82926,(Scomberomorus_sinensis:22.2776,(Scomberomorus_semifasciatus:18.9334,(Scomberomorus_commerson:13.4765,Scomberomorus_queenslandicus:13.4765):5.45696):3.34414):1.44723):2.31313,(Scomberomorus_munroi:14.308,Scomberomorus_niphonius:14.308):11.7299):1.06672,(Scomberomorus_koreanus:12.269,Scomberomorus_guttatus:12.269):14.8356):16.9866):8.25114,((((Scomber_australasicus:2.38807,(Scomber_japonicus:0.862398,Scomber_colias:0.862398):1.52568):17.4614,Scomber_scombrus:19.8495):11.0445,(Rastrelliger_faughni:11.1441,Rastrelliger_brachysoma:11.1441):19.7499):15.0085,(Grammatorcynus_bicarinatus:19.3824,Grammatorcynus_bilineatus:19.3824):26.52):6.43995):2.65757):9.18962):2.94206,((((Ariomma_bondi:2.43627,Ariomma_indicum:2.43627):20.8314,Ariomma_luridum:23.2677):6.51885,Ariomma_brevimanum:29.7866):5.6758,(((Cubiceps_squamiceps:16.9183,(((Psenes_arafurensis:8.7244,(Cubiceps_baxteri:0.1164,Psenes_maculatus:0.1164):8.608):2.02258,Psenes_pellucidus:10.747):1.66984,Psenes_cyanophrys:12.4168):4.50151):10.8718,Cubiceps_paradoxus:27.7901):0.189913,Cubiceps_gracilis:27.9801):7.48231):31.6693):3.52629,((((Neoepinnula_orientalis:44.0656,Ruvettus_pretiosus:44.0656):17.6183,((Rexea_solandri:35.8338,(((Gempylus_serpens:11.3557,Thyrsites_atun:11.3557):6.35698,Neoepinnula_americana:17.7127):17.9854,(Rexea_prometheoides:20.7887,Rexea_antefurcata:20.7887):14.9093):0.135788):15.4352,(((Promethichthys_prometheus:23.6076,Nealotus_tripes:23.6076):11.0824,Nesiarchus_nasutus:34.69):0.075804,(Diplospinus_multistriatus:16.3748,Paradiplospinus_antarcticus:16.3748):18.391):16.5032):10.4149):5.47397,Lepidocybium_flavobrunneum:67.1578):2.41135,((Taractes_asper:31.6001,(Brama_orcini:25.3839,(Taractichthys_longipinnis:25.2121,(Brama_australis:10.0162,(Pterycombus_brama:9.92027,(Brama_brama:5.06194,Brama_japonica:5.06194):4.85833):0.095938):15.1959):0.171753):6.21623):36.478,((((Lepidopus_caudatus:37.6696,Assurger_anzac:37.6696):12.6089,(((Aphanopus_carbo:1.1265,Aphanopus_intermedius:1.1265):35.9307,Lepidopus_altifrons:37.0572):0.156672,(Trichiurus_lepturus:12.5545,Trichiurus_brevis:12.5545):24.6594):13.0646):15.9925,Benthodesmus_simonyi:66.2709):0.068643,Lepidopus_fitchi:66.3396):1.73854):1.49107):1.08878):1.02377):1.57562):1.9644):4.70476,Kali_macrura:79.9265):9.81135):26.6331,((((((((Lythrypnus_dalli:25.8738,Lythrypnus_zebra:25.8738):58.4004,((Kathetostoma_canaster:16.616,Kathetostoma_giganteum:16.616):60.8484,(Uranoscopus_scaber:15.7377,(Uranoscopus_albesca:0.178845,Uranoscopus_cadenati:0.178845):15.5588):61.7267):6.80989):15.741,(((Parapercis_clathrata:94.6848,(Cheimarrichthys_fosteri:92.063,(Parapercis_sexfasciata:58.3937,(Parapercis_allporti:46.4487,Parapercis_ramsayi:46.4487):11.9449):33.6693):2.62181):0.096613,Parapercis_cylindrica:94.7814):2.50052,(((Sillaginodes_punctatus:59.0441,Sillago_chondropus:59.0441):19.8022,((Sillago_bassensis:18.8475,Sillago_flindersi:18.8475):53.4286,((Sillago_aeolus:20.6302,Sillago_sihama:20.6302):19.2223,(Sillago_vincenti:31.1652,Sillago_japonica:31.1652):8.68723):32.4237):6.57014):17.5522,((Parequula_melbournensis:95.2846,((Eucinostomus_gula:48.2269,(((Gerres_macracanthus:14.4168,Gerres_filamentosus:14.4168):18.6233,((Gerres_phaiya:23.3806,Gerres_erythrourus:23.3806):4.84481,Gerres_equulus:28.2255):4.81471):5.55204,Gerres_cinereus:38.5922):9.63472):27.4355,(Gerres_argyreus:36.93,((Diapterus_peruvianus:14.9042,Diapterus_auratus:14.9042):2.50462,Eugerres_plumieri:17.4088):19.5211):38.7325):19.6222):0.097071,(Eucinostomus_melanopterus:15.7009,Eucinostomus_argenteus:15.7009):79.6808):1.01675):0.883493):2.73331):1.81151,((((((Malakichthys_wakiyae:10.525,(Malakichthys_griseus:6.17332,(Malakichthys_barbatus:5.23821,Malakichthys_elegans:5.23821):0.93511):4.35167):35.3902,(Synagrops_philippinensis:25.8241,(Synagrops_japonicus:11.3375,Synagrops_bellus:11.3375):14.4866):20.0911):3.1106,(Acropoma_hanedai:19.7393,Acropoma_japonicum:19.7393):29.2865):0.124574,Doederleinia_berycoides:49.1504):1.02328,((Scombrops_boops:7.07545,Scombrops_gilberti:7.07545):26.8262,(Epigonus_constanciae:26.2391,Epigonus_telescopus:26.2391):7.66257):16.27197):3.11524,((Banjos_banjos:18.6923,((((Polyprion_oxygeneios:4.47363,Polyprion_americanus:4.47363):11.7038,Stereolepis_doederleini:16.1774):0.149045,Stereolepis_gigas:16.3265):2.11415,((Pentaceros_japonicus:12.8054,Pseudopentaceros_richardsoni:12.8054):1.26604,Pseudopentaceros_pectoralis:14.0715):4.36912):0.251709):24.7484,(Dinolestes_lewini:17.7767,(Lateolabrax_japonicus:15.8495,Lateolabrax_latus:15.8495):1.92717):25.664):9.8482):48.5378):1.20062,(((((Oplegnathus_fasciatus:29.3634,(Oplegnathus_insignis:27.6207,Oplegnathus_punctatus:27.6207):1.7427):5.17701,Oplegnathus_woodwardi:34.5404):11.8544,(((((Terapon_theraps:9.09144,Leiopotherapon_aheneus:9.09144):0.063608,Leiopotherapon_unicolor:9.15505):12.3049,Pelates_octolineatus:21.46):0.12021,Pelates_quadrilineatus:21.5802):7.93841,Terapon_jarbua:29.5186):16.8762):7.8777,((Kuhlia_mugil:53.8492,Kuhlia_rupestris:53.8492):0.156093,(Dichistius_capensis:42.2565,(((((Atypichthys_latus:9.70576,Atypichthys_strigatus:9.70576):22.954,Microcanthus_strigatus:32.6598):6.56069,(Neoscorpis_lithophilus:31.7946,((((Girella_punctata:5.92354,(Girella_mezina:3.61904,Girella_leonina:3.61904):2.3045):9.23398,Girella_nigricans:15.1575):10.972,Graus_nigra:26.1295):5.57882,Tilodon_sexfasciatum:31.7084):0.086228):7.42589):2.66959,(Hermosilla_azurea:22.7777,(Kyphosus_cinerascens:5.96043,(Kyphosus_analogus:0.247032,Kyphosus_vaigiensis:0.247032):5.7134):16.8173):19.1124):0.173217,Medialuna_californiensis:42.0633):0.193198):11.7488):0.26719):42.6296,((((Ammodytes_tobianus:5.46044,Hyperoplus_lanceolatus:5.46044):23.471,(Ammodytes_americanus:11.0372,Ammodytes_personatus:11.0372):17.8942):59.9441,((((Malapterus_reticulatus:71.8621,((Pseudolabrus_japonicus:63.2467,((((Halichoeres_hortulanus:39.4786,((Halichoeres_richmondi:30.7698,((Halichoeres_brownfieldi:20.2322,((Halichoeres_prosopeion:8.56746,(Coris_aurilineata:6.02621,Coris_pictoides:6.02621):2.54125):4.66606,Halichoeres_solorensis:13.2335):6.99867):9.1737,(Halichoeres_marginatus:23.2416,(((Halichoeres_leucurus:14.3603,Halichoeres_argus:14.3603):0.766192,(Halichoeres_binotopsis:13.6533,Halichoeres_nigrescens:13.6533):1.47317):6.60833,(Halichoeres_melanurus:9.82846,Halichoeres_papilionaceus:9.82846):11.9064):1.50681):6.16426):1.3639):4.49431,((((Halichoeres_chrysus:6.06646,Halichoeres_leucoxanthus:6.06646):10.3252,(Halichoeres_ornatissimus:13.2195,Halichoeres_biocellatus:13.2195):3.17212):1.35584,Halichoeres_melasmapomus:17.7475):14.4703,(((Coris_batuensis:10.6433,Halichoeres_chloropterus:10.6433):1.12814,Halichoeres_podostigma:11.7715):10.2494,(Halichoeres_miniatus:12.3038,(Halichoeres_margaritaceus:6.89642,Halichoeres_nebulosus:6.89642):5.40737):9.71705):10.1969):3.04634):4.21454):5.40926,(((((Macropharyngodon_kuiteri:12.4106,Macropharyngodon_choati:12.4106):0.109185,(Macropharyngodon_negrosensis:11.6039,(Macropharyngodon_cyanoguttatus:2.65183,Macropharyngodon_ornatus:2.65183):8.95205):0.915927):1.83453,(Halichoeres_lapillus:13.3109,Macropharyngodon_bipartitus_bipartitus:13.3109):1.04346):2.05218,(Macropharyngodon_meleagris:9.43725,Macropharyngodon_geoffroy:9.43725):6.96927):24.3756,(Halichoeres_scapularis:7.25421,Halichoeres_trimaculatus:7.25421):33.5279):4.10574):5.6135,(((((Halichoeres_semicinctus:12.0421,Oxyjulis_californica:12.0421):24.903,(Halichoeres_cyanocephalus:28.5213,((Halichoeres_maculipinna:10.8263,Halichoeres_garnoti:10.8263):15.0373,((Halichoeres_chierchiae:14.59,(Halichoeres_notospilus:12.5071,Halichoeres_rubrovirens:12.5071):2.08291):5.00244,(((Halichoeres_radiatus:5.72146,Halichoeres_brasiliensis:5.72146):10.9682,(Halichoeres_poeyi:13.8583,Halichoeres_bivittatus:13.8583):2.83136):2.37477,((((Halichoeres_dispilus:6.54102,(Halichoeres_burekae:3.04391,Halichoeres_socialis:3.04391):3.49711):0.737982,Halichoeres_pictus:7.279):2.09131,(Halichoeres_sazimai:0.415279,Halichoeres_bathyphilus:0.415279):8.95503):8.21005,Halichoeres_nicholsi:17.5804):1.48407):0.528056):6.27105):2.65781):8.42374):8.08108,((Pseudojuloides_cerasinus:17.3595,Pseudojuloides_atavai:17.3595):25.4121,(((((Coris_julis:26.666,Coris_picta:26.666):5.23805,Coris_dorsomacula:31.904):0.105362,((Cheilio_inermis:20.2082,Coris_aygula:20.2082):3.56317,Coris_flavovittata:23.7713):8.23805):7.64055,((Hologymnosus_doliatus:0.944754,Hologymnosus_annulatus:0.944754):33.474,(Coris_gaimard:16.0153,(Pseudocoris_yamashiroi:9.1831,Pseudocoris_heteroptera:9.1831):6.83215):18.4035):5.23115):1.62962,(Halichoeres_hartzfeldii:33.5288,Leptojulis_cyanopleura:33.5288):7.75077):1.49204):2.25455):2.47387,((Labrichthys_unilineatus:36.6575,(((Labroides_rubrolabiatus:16.1611,Larabicus_quadrilineatus:16.1611):0.119113,(Labroides_dimidiatus:9.84468,Labroides_bicolor:9.84468):6.43553):14.4004,(Diproctacanthus_xanthurus:16.9987,Labropsis_australis:16.9987):13.682):5.9769):8.98078,(Ophthalmolepis_lineolata:40.3249,((((Halichoeres_insularis:9.33514,Halichoeres_melanotis:9.33514):23.3293,(((((Gomphosus_caeruleus:9.04053,Gomphosus_varius:9.04053):7.24063,Thalassoma_amblycephalum:16.2812):0.073661,Thalassoma_robertsoni:16.3548):3.21213,((Thalassoma_newtoni:4.73051,(Thalassoma_ascensionis:4.61315,Thalassoma_pavo:4.61315):0.117361):12.3472,(((Thalassoma_noronhanum:6.43399,Thalassoma_bifasciatum:6.43399):6.73741,(Thalassoma_trilobatum:12.5471,(((Thalassoma_jansenii:3.02768,(Thalassoma_hardwicke:2.73722,Thalassoma_quinquevittatum:2.73722):0.290464):7.00943,((Thalassoma_genivittatum:5.26079,(Thalassoma_hebraicum:5.15394,Thalassoma_duperrey:5.15394):0.106855):1.46159,Thalassoma_lutescens:6.72239):3.31473):1.58062,Thalassoma_lunare:11.6177):0.929321):0.62434):3.77613,((Thalassoma_cupido:9.70977,Thalassoma_loxum:9.70977):4.16569,Thalassoma_purpureum:13.8755):3.07208):0.130228):2.48919):6.19328,(Thalassoma_ballieui:15.6352,Thalassoma_septemfasciatum:15.6352):10.125):6.90418):1.97847,(Stethojulis_trilineata:13.077,((Stethojulis_albovittata:0.511153,Stethojulis_bandanensis:0.511153):0.886868,Stethojulis_balteata:1.39802):11.679):21.5659):4.47998,(Hemigymnus_melapterus:9.62146,Hemigymnus_fasciatus:9.62146):29.5014):1.20201):5.31345):1.8617):2.11409,(Anampses_caeruleopunctatus:21.16,((Anampses_meleagrides:12.1098,(Anampses_neoguinaicus:7.90446,Anampses_twistii:7.90446):4.20539):4.78924,Anampses_geographicus:16.8991):4.2609):28.4541):0.887272):7.57416,(Suezichthys_gracilis:44.1441,((Notolabrus_gymnogenis:27.0835,(Pseudolabrus_gayi:20.4485,(Pictilabrus_laticlavius:15.7303,((Notolabrus_fucicola:0.04536,Notolabrus_tetricus:0.04536):5.80803,Austrolabrus_maculatus:5.85339):9.87686):4.71822):6.63503):1.08488,Notolabrus_parilus:28.1684):15.9757):13.9315):5.17118):4.16924,(Novaculichthys_macrolepidotus:51.0111,(Novaculichthys_taeniourus:41.3204,(Xyrichtys_splendens:39.3737,((Xyrichtys_novacula:21.4342,Xyrichtys_martinicensis:21.4342):8.33659,(Iniistius_aneitensis:23.7639,(Cymolutes_praetextatus:6.23011,Cymolutes_torquatus:6.23011):17.5338):6.00683):9.60299):1.94664):9.69066):16.4049):4.4461):5.56958,((Pseudocheilinus_evanidus:42.6157,Cirrhilabrus_temminckii:42.6157):22.3601,(Pteragogus_cryptus:17.0897,Pteragogus_enneacanthus:17.0897):47.8862):12.4558):2.5433,((((((Oxycheilinus_digramma:5.92738,Oxycheilinus_unifasciatus:5.92738):22.016,(Oxycheilinus_bimaculatus:24.2649,(Cheilinus_fasciatus:20.5003,(Wetmorella_nigropinnata:19.5827,(Cheilinus_undulatus:14.7313,(Epibulus_insidiator:1.99098,Epibulus_brevis:1.99098):12.7403):4.85135):0.917639):3.76462):3.67846):10.7431,(Cheilinus_chlorourus:9.04375,(Cheilinus_oxycephalus:3.25257,Cheilinus_trilobatus:3.25257):5.79118):29.6428):2.00563,Oxycheilinus_celebicus:40.6922):34.8437,((((Labrus_mixtus:12.7026,(Labrus_merula:0.11143,Labrus_bergylta:0.11143):12.5911):13.0182,(Tautoga_onitis:20.7964,(Acantholabrus_palloni:14.873,(Ctenolabrus_rupestris:12.1127,Tautogolabrus_adspersus:12.1127):2.76029):5.92342):4.92433):3.64733,((Centrolabrus_exoletus:0.101626,Symphodus_melanocercus:0.101626):14.941,(((Symphodus_roissali:1.94828,Centrolabrus_trutta:1.94828):4.28603,Centrolabrus_caeruleus:6.23431):1.23138,(((Symphodus_mediterraneus:4.29805,Symphodus_melops:4.29805):0.864845,(((Symphodus_doderleini:4.24552,Symphodus_cinereus:4.24552):0.078987,(Symphodus_rostratus:2.58542,Symphodus_bailloni:2.58542):1.73909):0.396767,Symphodus_tinca:4.72127):0.441621):0.46502,Symphodus_ocellatus:5.62791):1.83778):7.57692):14.3255):0.141238,Lappanella_fasciata:29.5093):46.0266):1.83687,((Siganus_rivulatus:32.8027,((((((((((Chlorurus_sordidus:9.79345,Chlorurus_japanensis:9.79345):2.20974,Chlorurus_oedema:12.0032):2.19114,((Chlorurus_bleekeri:5.25667,Chlorurus_bowersi:5.25667):4.4619,(Chlorurus_capistratoides:1.44475,Chlorurus_microrhinos:1.44475):8.27383):4.47575):10.8643,(Hipposcarus_harid:22.7026,((Bolbometopon_muricatum:16.9276,Cetoscarus_bicolor:16.9276):4.36693,(((Calotomus_spinidens:0.611895,Calotomus_carolinus:0.611895):17.0695,(((((Sparisoma_rocha:9.13315,Sparisoma_axillare:9.13315):1.78828,Sparisoma_rubripinne:10.9214):2.10719,((Sparisoma_chrysopterum:11.1366,(Sparisoma_amplum:0.954449,Sparisoma_viride:0.954449):10.1822):1.01389,(Sparisoma_frondosum:8.46533,Sparisoma_aurofrenatum:8.46533):3.68521):0.878088):2.74957,((Sparisoma_radians:13.8951,(Sparisoma_atomarium:1.70356,Sparisoma_tuiupiranga:1.70356):12.1916):1.22904,(Sparisoma_cretense:13.4366,Sparisoma_strigatum:13.4366):1.68758):0.653998):1.34812,((Nicholsina_usta_usta:8.07311,Nicholsina_denticulata:8.07311):4.57161,Cryptotomus_roseus:12.6447):4.48159):0.555091):0.815091,Leptoscarus_vaigiensis:18.4965):2.79807):1.40801):2.35605):1.38271,(Scarus_schlegeli:17.2866,(Scarus_hypselopterus:11.2436,Scarus_flavipectoralis:11.2436):6.04302):9.15472):0.838872,(Scarus_hoefleri:18.4215,Scarus_psittacus:18.4215):8.8587):0.957883,(Scarus_spinus:26.9616,((((Scarus_frenatus:6.49659,Scarus_dimidiatus:6.49659):4.95121,(Scarus_rubroviolaceus:10.957,((Scarus_forsteni:6.27324,(Scarus_niger:5.06222,Scarus_tricolor:5.06222):1.21102):1.47997,(Scarus_altipinnis:0.844212,Scarus_prasiognathos:0.844212):6.909):3.20381):0.490769):1.64418,Scarus_ghobban:13.092):1.80239,(((Scarus_coelestinus:3.46633,Scarus_guacamaia:3.46633):4.42644,Scarus_iseri:7.89277):4.47847,Scarus_taeniopterus:12.3712):2.52313):12.0672):1.27651):1.54733,(Scarus_chameleon:2.99695,Scarus_festivus:2.99695):26.7885):0.916796,Scarus_quoyi:30.7022):1.99689,(Scarus_oviceps:2.48386,Scarus_globiceps:2.48386):30.2152):0.103624):16.8587,Cephalopholis_argus:49.6614):27.7114):2.60219):2.80074,(Lachnolaimus_maximus:70.8395,((Achoerodus_viridis:43.517,Pseudodax_moluccanus:43.517):21.5169,(((Odax_acroptilus:36.6051,(((Siphonognathus_argyrophanes:21.0035,(Haletta_semifasciata:2.69014,Neoodax_balteatus:2.69014):18.3134):7.1323,Odax_cyanomelas:28.1358):4.8282,(Odax_cyanoallix:9.6754,Odax_pullus:9.6754):23.2886):3.64108):18.0293,(Choerodon_fasciatus:40.4212,((Choerodon_anchorago:31.5109,(Choerodon_oligacanthus:26.612,Choerodon_schoenleinii:26.612):4.89886):8.84438,(Xiphocheilus_typus:18.8059,Choerodon_azurio:18.8059):21.5494):0.066):14.2131):7.60367,(Bodianus_rufus:34.1881,(Clepticus_parrae:32.3855,(Bodianus_scrofa:27.8116,(Bodianus_mesothorax:25.2997,(Semicossyphus_darwini:6.43997,Semicossyphus_pulcher:6.43997):18.8598):2.51183):4.57392):1.80257):28.05):2.79585):5.80555):11.9362):6.09985):5.77937,(((((Coreoperca_kawamebari:34.4172,Coreoperca_whiteheadi:34.4172):21.9441,(((Siniperca_roulei:12.3292,((Siniperca_fortis:10.3447,Siniperca_undulata:10.3447):1.19259,((Siniperca_chuatsi:4.28288,Siniperca_knerii:4.28288):5.22906,Siniperca_obscura:9.51194):2.02531):0.791905):1.98132,Siniperca_scherzeri:14.3105):37.1049,Coreoperca_herzi:51.4154):4.9459):4.34037,((Elassoma_evergladei:13.3985,((Elassoma_boehlkei:7.53935,(Elassoma_gilberti:2.61149,Elassoma_okefenokee:2.61149):4.92786):3.17215,(Elassoma_zonatum:8.68238,Elassoma_alabamae:8.68238):2.02912):2.68704):41.1208,((Acantharchus_pomotis:34.2766,(((((Ambloplites_ariommus:4.01988,Ambloplites_rupestris:4.01988):8.36995,(Ambloplites_cavifrons:8.08107,Ambloplites_constellatus:8.08107):4.30877):7.12525,(Archoplites_interruptus:16.2296,(Pomoxis_nigromaculatus:3.90943,Pomoxis_annularis:3.90943):12.3201):3.28553):2.47068,(Enneacanthus_chaetodon:13.434,(Enneacanthus_gloriosus:3.7352,Enneacanthus_obesus:3.7352):9.69878):8.55177):2.79082,Centrarchus_macropterus:24.7766):9.49998):4.91903,(((Micropterus_dolomieu:2.01164,Micropterus_punctulatus:2.01164):10.1966,(Micropterus_coosae:10.4056,(((Micropterus_floridanus:4.56858,Micropterus_salmoides:4.56858):3.5417,(Micropterus_treculii:6.84353,Micropterus_notius:6.84353):1.26674):1.62948,Micropterus_cataractae:9.73975):0.665891):1.80259):23.1246,((Lepomis_gulosus:14.8052,(Lepomis_cyanellus:7.51813,Lepomis_symmetricus:7.51813):7.28704):10.7717,((Lepomis_humilis:11.4381,Lepomis_macrochirus:11.4381):9.52664,(((Lepomis_gibbosus:10.8137,(Lepomis_microlophus:5.56069,(Lepomis_miniatus:3.32138,Lepomis_punctatus:3.32138):2.23932):5.25301):3.12125,(Lepomis_marginatus:7.01817,Lepomis_megalotis:7.01817):6.91679):4.04058,Lepomis_auritus:17.9755):2.98924):4.6121):9.75598):3.86275):15.3237):6.18236):3.76791,((((((((Edelia_vittata:10.1392,(Nannoperca_australis:1.39193,Nannoperca_obscura:1.39193):8.74726):3.77455,Nannoperca_oxleyana:13.9137):3.61677,Nannoperca_variegata:17.5305):4.85792,Nannatherina_balstoni:22.3884):4.09716,(Macquaria_australasica:18.0137,Macquaria_ambigua:18.0137):8.47188):9.76416,Bostockia_porosa:36.2498):10.836,((Percichthys_trucha:33.3751,(Maccullochella_macquariensis:6.12348,(Maccullochella_ikei:1.92863,Maccullochella_peelii_peelii:1.92863):4.19485):27.2516):1.57956,(Gadopsis_bispinosus:6.85192,Gadopsis_marmoratus:6.85192):28.1027):12.1311):14.6882,Macquaria_colonorum:61.774):2.69561):4.6308,(Enoplosus_armatus:66.2986,((Centrogenys_vaigiensis:54.4393,((((Cheilodactylus_rubrolabiatus:17.6913,(Goniistius_quadricornis:8.56042,Goniistius_zonatus:8.56042):9.13091):3.93252,((Goniistius_fuscus:14.1215,(((Goniistius_spectabilis:10.2301,((Chirodactylus_jessicalenorum:3.63139,Chirodactylus_brachydactylus:3.63139):1.27178,Chirodactylus_grandis:4.90317):5.32698):0.998527,((Dactylophora_nigricans:8.74178,Cheilodactylus_variegatus:8.74178):1.58359,(((Nemadactylus_douglasii:1.88853,Nemadactylus_valenciennesi:1.88853):2.62622,(Nemadactylus_monodactylus:1.74813,(Nemadactylus_macropterus:1.08329,(Nemadactylus_bergi:0.905326,Nemadactylus_gayi:0.905326):0.177966):0.664841):2.76662):4.98239,Cheilodactylus_nigripes:9.49714):0.828231):0.903302):2.06843,Goniistius_ephippium:13.2971):0.824377):7.30734,(((Goniistius_zebra:7.34677,Goniistius_plessisi:7.34677):1.20647,Goniistius_vittatus:8.55323):8.18237,(Goniistius_gibbosus:11.4395,Goniistius_vestitus:11.4395):5.29614):4.69322):0.195025):23.4905,(Cheilodactylus_fasciatus:2.37007,Cheilodactylus_pixi:2.37007):42.7443):2.0466,(((Aplodactylus_etheridgii:17.1993,Crinodus_lophodon:17.1993):5.76004,((Aplodactylus_arctidens:12.363,Aplodactylus_punctatus:12.363):6.00327,Aplodactylus_westralis:18.3662):4.59306):19.5363,(((Threpterius_maculosus:7.36607,(Chironemus_delfini:3.41091,Chironemus_georgianus:3.41091):3.95516):6.55455,Chironemus_microlepis:13.9206):3.7237,(Chironemus_bicornis:17.4585,Chironemus_marmoratus:17.4585):0.185799):24.8513):4.66535):7.27841):8.17396,((Paracirrhites_forsteri:31.6887,(Amblycirrhitus_bimacula:19.073,(Amblycirrhitus_pinos:18.978,Cirrhitus_rivulatus:18.978):0.094994):12.6158):21.9393,((Cirrhitops_mascarenensis:13.2484,Cirrhitops_fasciatus:13.2484):30.9895,((Cirrhitus_pinnulatus:16.734,Paracirrhites_arcatus:16.734):27.3971,Notocirrhitus_splendens:44.1311):0.106758):9.39021):8.98525):3.68526):2.80181):25.5545):2.24718):6.12525):1.96541,((Pholidichthys_leucotaenia:88.0042,(((Glaucosoma_buergeri:9.37571,Glaucosoma_scapulare:9.37571):14.7134,(Glaucosoma_magnificum:23.9655,Glaucosoma_hebraicum:23.9655):0.123596):47.6366,(Pempheris_oualensis:38.3512,(Parapriacanthus_ransonneti:36.9617,(Parapriacanthus_elongatus:36.3846,(Pempheris_schwenkii:16.1388,Pempheris_vanicolensis:16.1388):20.2458):0.577033):1.38958):33.3745):16.2785):12.3503,((Decodon_melasma:88.733,((Dicentrarchus_punctatus:29.5583,Dicentrarchus_labrax:29.5583):44.4417,(((Morone_mississippiensis:8.45406,Morone_americana:8.45406):12.524,Morone_saxatilis:20.9781):10.3338,Morone_chrysops:31.3119):42.6881):14.733):9.6541,((Schuettea_scalaripinnis:61.51475,(((Hoplolatilus_purpureus:49.6118,((Branchiostegus_auratus:20.5954,(Branchiostegus_japonicus:8.20044,((Branchiostegus_argentatus:4.50799,Branchiostegus_wardi:4.50799):1.48989,Branchiostegus_albus:5.99788):2.20256):12.3949):13.4124,(Branchiostegus_semifasciatus:21.4473,(Caulolatilus_microps:13.9928,Lopholatilus_chamaeleonticeps:13.9928):7.45445):12.5605):15.604):5.44318,(Caulolatilus_affinis:11.612,Caulolatilus_princeps:11.612):43.443):4.43087,((Emmelichthys_nitidus_nitidus:19.3185,(Erythrocles_monodi:12.0946,Erythrocles_schlegelii:12.0946):7.22395):38.6509,((Inermia_vittata:48.052,((((Plectorhinchus_mediterraneus:37.5538,(((Plectorhinchus_cinctus:17.2404,Plectorhinchus_chaetodonoides:17.2404):4.33575,((Diagramma_picta:3.86122,Diagramma_labiosum:3.86122):6.94279,(Plectorhinchus_lineatus:6.08957,Plectorhinchus_diagrammus:6.08957):4.71444):10.7721):6.75729,Plectorhinchus_chrysotaenia:28.3334):9.22034):8.7891,(((((Brachydeuterus_auritus:29.3766,((Microlepidotus_inornatus:14.3547,Orthopristis_chrysoptera:14.3547):12.0954,(((Anisotremus_interruptus:3.06329,Anisotremus_surinamensis:3.06329):13.2172,(Anisotremus_davidsonii:13.8541,(Anisotremus_caesius:5.93595,(Anisotremus_taeniatus:2.13683,Anisotremus_virginicus:2.13683):3.79912):7.91817):2.42633):5.08499,Anisotremus_scapularis:21.3654):5.08466):2.92648):1.79337,((Anisotremus_dovii:12.6101,Anisotremus_pacifici:12.6101):13.979,Genyatremus_luteus:26.589):4.58094):0.103902,((Anisotremus_moricandi:27.2275,(((Haemulon_squamipinna:16.108,((Haemulon_aurolineatum:13.1026,Haemulon_striatum:13.1026):1.55918,((((Haemulon_boschmae:9.09376,((Haemulon_maculicauda:1.00732,Haemulon_flaviguttatum:1.00732):7.21025,Haemulon_steindachneri:8.21757):0.87619):2.58694,(Haemulon_sexfasciatum:9.32416,Haemulon_scudderii:9.32416):2.35654):1.4896,(Haemulon_melanurum:11.075,Haemulon_album:11.075):2.09532):0.444203,Haemulon_plumierii:13.6145):1.04732):1.44614):0.885321,((Haemulon_bonariense:1.93306,Haemulon_parra:1.93306):12.6389,((Haemulon_carbonarium:2.52387,Haemulon_macrostomum:2.52387):5.90697,(Haemulon_flavolineatum:2.2826,Haemulon_sciurus:2.2826):6.14824):6.14108):2.42137):4.83121,Xenistius_californiensis:21.8245):5.40303):0.876465,Haemulon_chrysargyreum:28.104):3.16986):8.33829,(Pomadasys_incisus:36.0737,(((Pomadasys_hasta:16.5816,Pomadasys_maculatus:16.5816):14.6776,Pomadasys_kaakan:31.2592):0.087908,Pomadasys_perotaei:31.3471):4.72662):3.53841):0.092367,Pomadasys_olivaceus:39.7045):6.63836):0.084916,Plectorhinchus_macrolepis:46.4278):1.54603,(Hapalogenys_nigripinnis:26.9584,Hapalogenys_mucronatus:26.9584):21.0154):0.078201):7.4285,(((Symphorichthys_spilurus:16.6952,Symphorus_nematophorus:16.6952):22.3742,(((Lutjanus_colorado:31.2117,((((((((Lutjanus_fulviflamma:13.6103,(Lutjanus_monostigma:10.6777,(Lutjanus_carponotatus:8.1077,Lutjanus_russellii:8.1077):2.57):2.93262):0.895959,((Lutjanus_lutjanus:8.25066,(Lutjanus_ophuysenii:0.319302,Lutjanus_vitta:0.319302):7.93136):2.54946,(Lutjanus_decussatus:6.90087,Lutjanus_fulvus:6.90087):3.89925):3.70617):2.72428,(Lutjanus_rivulatus:0.673594,Lutjanus_stellatus:0.673594):16.557):0.517668,(Lutjanus_quinquelineatus:5.22003,(Lutjanus_kasmira:4.33837,Lutjanus_bengalensis:4.33837):0.881662):12.5282):0.732012,((Lutjanus_argentiventris:8.71059,(Lutjanus_griseus:8.53968,(Lutjanus_apodus:3.77702,Lutjanus_jocu:3.77702):4.76266):0.170908):7.59835,(Rhomboplites_aurorubens:12.2199,(((Lutjanus_cyanopterus:6.69208,Ocyurus_chrysurus:6.69208):3.66373,((Lutjanus_analis:8.8283,Lutjanus_mahogoni:8.8283):0.171499,Lutjanus_synagris:8.9998):1.35601):0.82898,((((Lutjanus_peru:0.114866,Lutjanus_campechanus:0.114866):5.41654,Lutjanus_vivanus:5.5314):2.04598,Etelis_oculatus:7.57739):1.83869,Lutjanus_buccanella:9.41608):1.76871):1.03508):4.08907):2.17132):1.07232,(Lutjanus_novemfasciatus:7.53859,(Lutjanus_argentimaculatus:3.1657,Lutjanus_dentatus:3.1657):4.37288):12.014):5.6529,(((Lutjanus_malabaricus:14.7837,(Lutjanus_adetii:12.0012,Lutjanus_sebae:12.0012):2.78249):5.92651,(Pinjalo_pinjalo:17.4273,(Lutjanus_erythropterus:0.885318,Lutjanus_sanguineus:0.885318):16.542):3.28293):4.05023,(Gymnocaesio_gymnoptera:17.9791,Caesio_lunaris:17.9791):6.78136):0.445003):0.897128,((Lutjanus_bohar:15.0798,Lutjanus_gibbus:15.0798):7.94545,(Macolor_niger:18.966,((Caesio_cuning:15.3312,(Pterocaesio_marri:6.65798,(Dipterygonotus_balteatus:6.54552,Pterocaesio_pisang:6.54552):0.112463):8.67325):2.32084,Caesio_caerulaurea:17.6521):1.31396):4.05917):3.07739):5.1091):0.173684,Pterocaesio_digramma:31.3854):4.7823,(Aprion_virescens:29.8619,Aphareus_furca:29.8619):6.30574):2.90173):8.96688,Apsilus_fuscus:48.0363):7.44424):2.48888):1.51643):2.02894):35.075,(((((Gnathodentex_aureolineatus:24.0526,Monotaxis_grandoculis:24.0526):11.4324,(((Gymnocranius_grandoculis:15.148,Gymnocranius_griseus:15.148):12.5753,Gymnocranius_elongatus:27.7232):3.87767,Wattsia_mossambica:31.6009):3.88413):21.8395,(((Lethrinus_genivittatus:24.3528,(Lethrinus_miniatus:22.757,((Lethrinus_erythropterus:21.0129,(Lethrinus_semicinctus:17.0976,(((Lethrinus_rubrioperculatus:6.6811,Lethrinus_reticulatus:6.6811):4.3267,Lethrinus_microdon:11.0078):2.48023,Lethrinus_olivaceus:13.488):3.60954):3.91537):0.73478,Lethrinus_erythracanthus:21.7477):1.0093):1.59573):3.53979,(Lethrinus_haematopterus:19.787,(((Lethrinus_nebulosus:10.8428,(Lethrinus_ornatus:7.44362,Lethrinus_lentjan:7.44362):3.39917):2.5648,(Lethrinus_laticaudis:10.7348,Lethrinus_obsoletus:10.7348):2.67284):1.98542,Lethrinus_harak:15.393):4.39403):8.10549):7.14677,((Lethrinus_atlanticus:15.5433,Lethrinus_xanthochilus:15.5433):15.6743,(Lethrinus_atkinsoni:16.5073,Lethrinus_borbonicus:16.5073):14.7103):3.82171):22.2852):22.9231,((Pristipomoides_typus:59.8978,((((((Stellifer_illecebrosus:20.4726,Stellifer_lanceolatus:20.4726):7.37765,(((Stellifer_microps:2.62629,Stellifer_naso:2.62629):19.7062,((Stellifer_stellifer:13.8123,Stellifer_rastrifer:13.8123):8.40174,(Bairdiella_armata:15.9128,Bairdiella_ronchus:15.9128):6.30117):0.118549):2.14436,Bairdiella_chrysoura:24.4769):3.3733):9.9965,(Argyrosomus_regius:1.47076,Umbrina_cirrosa:1.47076):36.3759):5.19534,(((((Sciaenops_ocellatus:27.8891,((((Menticirrhus_undulatus:6.74046,Menticirrhus_littoralis:6.74046):6.85255,Menticirrhus_americanus:13.593):9.59334,((Micropogonias_furnieri:2.95798,Micropogonias_undulatus:2.95798):17.3002,Pogonias_cromis:20.2581):2.92821):3.61281,(Umbrina_canariensis:23.9305,(Larimus_fasciatus:21.0308,(((((Cynoscion_striatus:6.40197,Atractoscion_nobilis:6.40197):4.22937,Cynoscion_guatucupa:10.6313):3.68926,Totoaba_macdonaldi:14.3206):0.304176,Aplodinotus_grunniens:14.6248):6.19861,Leiostomus_xanthurus:20.8234):0.207404):2.899715):2.86865):1.08997):1.97001,((Miichthys_miiuy:26.269,((Larimichthys_crocea:11.1991,Larimichthys_polyactis:11.1991):3.798,(Collichthys_lucidus:0.2358,Collichthys_niveatus:0.2358):14.7613):11.272):3.4208,(Protonibea_diacanthus:27.3828,(Atractoscion_aequidens:27.0308,(((((Cynoscion_nebulosus:16.9207,((Cynoscion_nothus:8.22278,Cynoscion_reticulatus:8.22278):6.47367,Cynoscion_othonopterus:14.6964):2.22425):3.02745,(Cynoscion_jamaicensis:17.7548,(Macrodon_ancylodon:0.241739,Macrodon_mordax:0.241739):17.5131):2.19334):1.20235,((Cynoscion_regalis:10.2416,Cynoscion_arenarius:10.2416):9.80509,((Cynoscion_acoupa:5.36669,(Cynoscion_albus:0.623128,Cynoscion_xanthulus:0.623128):4.74356):9.62718,Cynoscion_parvipinnis:14.9939):5.05284):1.10379):2.59317,(Cynoscion_microlepidotus:20.0074,((Cynoscion_squamipinnis:12.0158,Cynoscion_praedatorius:12.0158):4.45803,((Cynoscion_phoxocephalus:2.39679,Cynoscion_leiarchus:2.39679):12.4895,(Cynoscion_analis:7.86551,Isopisthus_remifer:7.86551):7.02075):1.58758):3.53353):3.73629):1.2256,Cynoscion_virescens:24.9693):2.06157):0.351922):2.30707):0.169316):5.64169,((Lonchurus_lanceolatus:27.5923,(Pennahia_argentata:25.8254,Otolithoides_biauritus:25.8254):1.76694):5.35887,(Roncador_stearnsii:22.6106,(Umbrina_roncador:11.8501,Cheilotrema_saturnum:11.8501):10.7606):10.3406):2.54965):1.13554,((((Pseudotolithus_typus:13.6661,Pseudotolithus_senegalensis:13.6661):15.9321,(Johnius_belangerii:23.8047,(Pseudotolithus_elongatus:17.7062,(Johnius_borneensis:13.0796,Johnius_dussumieri:13.0796):4.62663):6.09854):5.79343):3.26347,((Nibea_coibor:5.41252,Nibea_albiflora:5.41252):26.1535,Pseudotolithus_senegallus:31.566):1.29559):3.35109,(Otolithes_ruber:13.6781,Otolithes_cuvieri:13.6781):22.5346):0.423667):4.72614,Seriphus_politus:41.3625):1.67952):2.72752,(Nebris_microps:12.3372,Nebris_occidentalis:12.3372):33.4323):6.28577,Cilus_gilberti:52.0553):7.8425):11.2855,(Datnioides_polota:58.6468,((Chaetodipterus_faber:25.8867,(Platax_orbicularis:11.3302,(Platax_boersii:6.43645,Platax_teira:6.43645):4.89376):14.5565):29.9122,(Drepane_africana:19.7838,Drepane_punctata:19.7838):36.0152):2.8478):12.5365):9.06426):14.4565,((((Callanthias_ruber:82.6438,((((Parascolopsis_eriomma:43.7324,((((Nemipterus_virgatus:14.8537,(Nemipterus_hexodon:11.286,Nemipterus_bathybius:11.286):3.5677):13.9055,(Nemipterus_balinensis:22.4987,Nemipterus_marginatus:22.4987):6.26043):6.56857,Pentapodus_caninus:35.3277):4.59437,(Pentapodus_setosus:21.9353,Pentapodus_bifasciatus:21.9353):17.9868):3.81031):0.078113,(((Scolopsis_affinis:19.1099,Scolopsis_taenioptera:19.1099):6.13447,Scolopsis_vosmeri:25.2443):3.83066,Scolopsis_ciliata:29.075):14.7355):28.979,Nemipterus_furcosus:72.7895):0.086099,(((((Dentex_abei:10.8821,Evynnis_tumifrons:10.8821):19.9727,((Dentex_angolensis:0.855061,Dentex_maroccanus:0.855061):23.5446,Dentex_macrophthalmus:24.3997):6.45514):5.46793,((Pterogymnus_laniarius:24.0608,(Chrysoblephus_cristiceps:18.8606,((Argyrozona_argyrozona:15.9488,Cymatoceps_nasutus:15.9488):2.7706,(Petrus_rupestris:12.9864,Polysteganus_praeorbitalis:12.9864):5.73301):0.141257):5.20022):5.77949,(((Pagrus_auriga:13.9438,Pagrus_caeruleostictus:13.9438):9.78755,(Pagrus_pagrus:20.2443,(Pagellus_bellottii:10.8318,Pagellus_erythrinus:10.8318):9.41257):3.48706):3.62542,((Dentex_dentex:16.405,(Dentex_gibbosus:13.5722,((Dentex_canariensis:6.92129,Cheimerius_nufar:6.92129):0.541275,Virididentex_acromegalus:7.46256):6.10959):2.83281):6.15298,((Argyrops_spinifer:1.22689,Argyrops_bleekeri:1.22689):17.4542,((Pagrus_major:3.62273,Pagrus_auratus:3.62273):10.8592,(Cheimerius_matsubarai:10.1439,(Evynnis_japonica:3.17034,Parargyrops_edita:3.17034):6.97358):4.33801):4.19921):3.87681):4.79887):2.48351):6.48241):25.6773,(((Calamus_calamus:38.5318,(((Calamus_penna:11.9538,Stenotomus_chrysops:11.9538):12.5293,(Calamus_brachysomus:13.9124,Calamus_nodosus:13.9124):10.5707):8.50795,(Lagodon_rhomboides:26.2494,Archosargus_probatocephalus:26.2494):6.74164):5.54073):4.35362,((Chrysoblephus_anglicus:32.3354,((Spondyliosoma_cantharus:25.0546,(Sarpa_salpa:18.0657,Boops_boops:18.0657):6.98889):3.86819,((((Rhabdosargus_thorpei:14.2564,(Rhabdosargus_sarba:11.9014,Sparodon_durbanensis:11.9014):2.35505):10.3831,(Pagellus_acarne:15.8006,Pagellus_bogaraveo:15.8006):8.83894):0.873447,(Crenidens_crenidens:22.8771,Lithognathus_mormyrus:22.8771):2.63586):1.85292,(((Sparidentex_hasta:15.295,(Acanthopagrus_latus:13.3004,((Acanthopagrus_taiwanensis:10.6826,(Acanthopagrus_berda:4.69791,Acanthopagrus_schlegelii_schlegelii:4.69791):5.98469):2.12468,((Acanthopagrus_chinshira:10.2347,(Acanthopagrus_australis:8.58873,Acanthopagrus_butcheri:8.58873):1.64602):0.839281,Acanthopagrus_sivicolus:11.074):1.73325):0.493116):1.99463):1.65032,Acanthopagrus_bifasciatus:16.9454):7.9531,((Diplodus_fasciatus:12.9684,Diplodus_cervinus:12.9684):7.67938,(((Oblada_melanura:12.6334,Pachymetopon_grande:12.6334):2.9499,Diplodus_puntazzo:15.5833):3.19452,((Diplodus_bellottii:5.06602,Diplodus_annularis:5.06602):8.64159,(Diplodus_prayensis:2.94095,Diplodus_vulgaris:2.94095):10.7667):5.07018):1.87002):4.25064):2.46744):1.55687):3.41266):3.50147,((((Diplodus_sargus_cadenati:1.73011,Diplodus_sargus_sargus:1.73011):0.371463,Diplodus_noct:2.10158):4.20162,((Diplodus_sargus_lineatus:2.62595,Diplodus_argenteus_argenteus:2.62595):2.17532,(Diplodus_bermudensis:4.302,(Diplodus_holbrookii:2.55714,Diplodus_capensis:2.55714):1.74486):0.499268):1.50192):26.2296,((Boopsoidea_inornata:23.4415,Gymnocrotaphus_curvidens:23.4415):1.90265,(Pachymetopon_aeneum:7.96244,Polyamblyodon_germanum:7.96244):17.3817):7.18866):3.30405):7.04854):6.58821,(Rhabdosargus_holubi:25.8153,Sparus_aurata:25.8153):23.6584):12.5264):0.173205,((Centracanthus_cirrus:50.2799,(Spicara_smaris:18.0007,Spicara_maena:18.0007):32.2792):9.87946,Spicara_alta:60.1593):2.01386):10.7024):9.76817):5.89213,(((Cookeolus_japonicus:30.8919,Pristigenys_serrula:30.8919):40.5113,(Heteropriacanthus_cruentatus:13.5917,Priacanthus_arenatus:13.5917):57.8115):4.21791,(Pristigenys_alta:75.4002,(Priacanthus_tayenus:10.222,Priacanthus_hamrur:10.222):65.1782):0.221):12.9147):3.51049,(((Siganus_argenteus:12.5361,Siganus_woodlandi:12.5361):9.04986,(((Siganus_luridus:9.46354,(Siganus_fuscescens:6.72735,(Siganus_sutor:4.22364,Siganus_canaliculatus:4.22364):2.50371):2.73619):1.09339,Siganus_spinus:10.5569):5.85158,((Siganus_javus:8.52988,(((Siganus_punctatissimus:5.74312,Siganus_puellus:5.74312):0.845642,(((Siganus_unimaculatus:0.720716,Siganus_vulpinus:0.720716):0.97978,(Siganus_uspi:1.58168,Siganus_magnificus:1.58168):0.118816):3.71745,Siganus_punctatus:5.41794):1.17082):1.76339,Siganus_stellatus:8.35216):0.177722):1.6104,((Siganus_vermiculatus:5.64207,(Siganus_corallinus:3.17759,(Siganus_virgatus:0.795846,Siganus_doliatus:0.795846):2.38174):2.46448):0.463844,(Siganus_guttatus:2.45993,(Siganus_lineatus:0.600707,Siganus_randalli:0.600707):1.85922):3.64599):4.03436):6.26823):5.17748):69.3547,((Scatophagus_argus:12.642,(Scatophagus_tetracanthus:12.4753,Selenotoca_multifasciata:12.4753):0.166717):77.1587,(((Antigonia_capros:73.2337,Capros_aper:73.2337):14.7932,((Cepola_pauciradiata:8.26675,Cepola_macrophthalma:8.26675):79.7008,(Lobotes_pacificus:85.0695,((((((Antennarius_maculatus:28.2173,Antennarius_multiocellatus:28.2173):20.6053,((Tathicarpus_butleri:23.2171,(Echinophryne_mitchellii:8.08031,Kuiterichthys_furcipilis:8.08031):15.1368):20.237,Antennarius_avalonis:43.4541):5.36862):8.13295,Antennarius_nummifer:56.9556):17.3252,Antennarius_striatus:74.2808):0.053133,(((((Lophius_gastrophysus:2.06268,Lophius_americanus:2.06268):3.40461,Lophius_piscatorius:5.46729):0.096466,Lophius_budegassa:5.56375):34.0954,Lophiodes_reticulatus:39.6591):14.2838,(Lophiodes_caulinaris:26.7407,Lophiodes_spilurus:26.7407):27.2022):20.3911):4.81598,((((Bertella_idiomorpha:24.6987,((Lophodolos_indicus:21.4195,Oneirodes_acanthias:21.4195):1.96155,Oneirodes_macrosteus:23.381):1.31769):11.2362,(((Himantolophus_groenlandicus:12.4326,(Himantolophus_appelii:2.64816,Himantolophus_sagamius:2.64816):9.78442):9.67646,Himantolophus_albinares:22.109):8.94785,(Ceratias_holboelli:30.9333,Melanocetus_johnsonii:30.9333):0.123583):4.87806):13.0499,(Linophryne_bicornis:44.7649,Gigantactis_vanhoeffeni:44.7649):4.21996):21.4186,((Chaunax_pictus:11.5784,Chaunax_suttkusi:11.5784):50.9099,((((Halieutichthys_aculeatus:25.8645,Ogcocephalus_nasutus:25.8645):4.69767,Zalieutes_elater:30.5621):0.130871,Dibranchus_atlanticus:30.693):0.09224,Ogcocephalus_parvus:30.7853):31.7031):7.91519):8.74645):5.91953):2.89813):0.059226):1.18499,(((((Anoplocapros_inermis:10.252,Aracana_ornata:10.252):39.748,(((Lactophrys_bicaudalis:7.93145,Rhinesomus_triqueter:7.93145):9.05722,(Acanthostracion_polygonius:7.62072,Acanthostracion_quadricornis:7.62072):9.36795):14.1221,(Lactoria_cornuta:22.7905,Tetrosomus_concatenatus:22.7905):8.320288):18.8892):33.9918,((((((Chilomycterus_reticulatus:8.53368,Allomycterus_pilatus:8.53368):5.91712,(Chilomycterus_antennatus:7.20041,Chilomycterus_schoepfii:7.20041):7.25039):0.745211,(Diodon_holocanthus:13.5481,(Diodon_hystrix:4.91591,Diodon_liturosus:4.91591):8.63216):1.64794):55.6556,(((((Tetractenos_glaber:5.46448,Tetractenos_hamiltoni:5.46448):24.4726,((Takifugu_flavidus:7.56374,((Takifugu_vermicularis:4.23454,(((Takifugu_pardalis:2.90443,(Takifugu_ocellatus:0.116581,Takifugu_variomaculatus:0.116581):2.78785):0.969964,((Takifugu_xanthopterus:3.26283,(Takifugu_alboplumbeus:2.66757,Takifugu_stictonotus:2.66757):0.595253):0.392548,((Takifugu_niphobles:0.279734,Takifugu_oblongus:0.279734):3.10471,((Takifugu_rubripes:0.871342,(Arothron_immaculatus:0.5726,Takifugu_pseudommus:0.5726):0.298742):2.2371,((Fugu_orbimaculatus:0.81322,(Takifugu_coronoidus:0.617566,(Takifugu_obscurus:0.26971,Takifugu_fasciatus:0.26971):0.347856):0.195654):1.83008,Takifugu_porphyreus:2.6433):0.465141):0.276003):0.270925):0.219022):0.16445,Takifugu_poecilonotus:4.03885):0.19569):1.46458,Takifugu_bimaculatus:5.69911):1.86462):10.5653,Torquigener_flavimaculosus:18.129):11.8081):6.97644,Marilyna_darwinii:36.9136):11.751,((((Lagocephalus_lunaris:27.358,((Lagocephalus_lagocephalus_lagocephalus:5.32879,Lagocephalus_laevigatus:5.32879):9.0707,(Lagocephalus_gloveri:0.248351,Lagocephalus_wheeleri:0.248351):14.1511):12.9585):1.37587,Lagocephalus_inermis:28.7339):16.1503,Sphoeroides_pachygaster:44.8842):2.27323,((((Tetraodon_biocellatus:10.7283,(Tetraodon_nigroviridis:2.01485,Tetraodon_fluviatilis:2.01485):8.71348):20.548,Tetraodon_leiurus:31.2763):4.40985,(((Canthigaster_bennetti:14.5147,((Canthigaster_valentini:10.7222,((Canthigaster_jactator:1.39986,Canthigaster_janthinoptera:1.39986):2.02889,Canthigaster_solandri:3.42875):7.29344):2.5597,Canthigaster_amboinensis:13.2819):1.23286):0.382299,Canthigaster_rostrata:14.897):20.0553,((Arothron_manilensis:15.1757,(Arothron_stellatus:9.7519,Arothron_hispidus:9.7519):5.42381):11.663,(Arothron_mappa:25.1903,(Chelonodon_patoca:23.4386,Arothron_nigropunctatus:23.4386):1.75166):1.6484):8.11368):0.733755):8.30822,(Sphoeroides_annulatus:15.6558,(Sphoeroides_lobatus:11.8441,(Sphoeroides_maculatus:9.50351,(Sphoeroides_dorsalis:5.57359,Sphoeroides_spengleri:5.57359):3.92992):2.34063):3.81162):28.3386):3.16303):1.50719):7.50817,Lagocephalus_sceleratus:56.1727):14.6788):7.95609,(((Masturus_lanceolatus:2.91561,Mola_mola:2.91561):13.7731,Mola_ramsayi:16.6887):24.8163,Ranzania_laevis:41.5051):37.3026):3.70975,((((((Anacanthus_barbatus:22.9223,(Cantherhines_pullus:16.1498,(Amanses_scopas:13.2849,Cantherhines_dumerilii:13.2849):2.8649):6.77257):5.81916,((Meuschenia_australis:6.03495,Meuschenia_trachylepis:6.03495):8.7635,(Acanthaluteres_vittiger:10.5681,Nelusetta_ayraud:10.5681):4.23032):13.943):7.05511,(Aluterus_monoceros:25.4426,Aluterus_scriptus:25.4426):10.354):2.80272,(Monacanthus_chinensis:33.1226,((Brachaluteres_jacksonianus:21.2472,Paraluteres_prionurus:21.2472):10.7246,(Monacanthus_ciliatus:22.9796,(Pervagor_spilosoma:11.9532,Stephanolepis_hispidus:11.9532):11.0263):8.99222):1.15078):5.47676):5.71951,Thamnaconus_modestus:44.3188):14.2766,(((Melichthys_vidua:5.17909,Melichthys_niger:5.17909):12.9401,((Odonus_niger:15.7551,Balistapus_undulatus:15.7551):1.2942,Balistoides_conspicillum:17.0493):1.06983):6.15652,(((Canthidermis_maculata:19.4428,(Abalistes_stellatus:18.3677,((((Balistes_polylepis:3.29129,Balistes_capriscus:3.29129):2.0397,Balistes_vetula:5.33099):7.38376,(Pseudobalistes_fuscus:9.05481,Pseudobalistes_naufragium:9.05481):3.65993):1.68088,Balistes_punctatus:14.3956):3.97203):1.0751):0.103866,((Rhinecanthus_aculeatus:8.16991,(Rhinecanthus_rectangulus:7.98985,(Rhinecanthus_lunula:6.18423,Rhinecanthus_verrucosus:6.18423):1.80562):0.180061):7.79583,(Sufflamen_verres:8.75761,(Sufflamen_bursa:5.28382,(Sufflamen_chrysopterum:0.951447,Sufflamen_albicaudatum:0.951447):4.33237):3.4738):7.20813):3.58089):2.30545,((Xanthichthys_mento:5.36886,(Xanthichthys_ringens:3.69635,Xanthichthys_auromarginatus:3.69635):1.67251):9.89154,(Balistoides_viridescens:2.15171,Pseudobalistes_flavimarginatus:2.15171):13.1087):6.59168):2.4236):34.3198):23.92198):1.47439):0.608767,Triodon_macropterus:84.6006):1.10944,(Pseudotriacanthus_strigilifer:24.2332,Trixiphichthys_weberi:24.2332):61.4769):3.50181):0.588845):1.14006):1.10565):1.34246,((((((Pomacanthus_annularis:22.3474,(((Pomacanthus_semicirculatus:16.4213,(Pomacanthus_rhomboides:10.9151,Pomacanthus_asfur:10.9151):5.50618):0.802479,Pomacanthus_maculosus:17.2237):4.24802,Pomacanthus_imperator:21.4718):0.875629):3.08534,(Pomacanthus_navarchus:20.2397,((Pomacanthus_zonipectus:9.4797,(Pomacanthus_arcuatus:9.29957,Pomacanthus_paru:9.29957):0.180128):8.89859,(Pomacanthus_sexstriatus:7.28902,Pomacanthus_xanthometopon:7.28902):11.0893):1.86137):5.19308):14.1602,((((Centropyge_multifasciata:15.944,Centropyge_venusta:15.944):10.0721,((Centropyge_eibli:7.94493,(Centropyge_flavissima:2.14566,Centropyge_vrolikii:2.14566):5.79927):10.5207,(Centropyge_tibicen:15.6505,(Centropyge_nox:13.2622,Centropyge_bicolor:13.2622):2.3883):2.81513):7.55043):0.134653,(Holacanthus_tricolor:17.1717,((Holacanthus_bermudensis:8.92397,Holacanthus_ciliaris:8.92397):0.371404,(Holacanthus_limbaughi:4.05067,Holacanthus_passer:4.05067):5.24471):7.87634):8.97896):1.58918,((Centropyge_aurantia:22.2021,((((((Centropyge_bispinosa:3.81569,Centropyge_ferrugata:3.81569):4.8442,(Centropyge_potteri:8.56589,Centropyge_loricula:8.56589):0.094011):3.93495,Centropyge_aurantonotus:12.5949):2.83843,Centropyge_flavicauda:15.4333):3.03148,(Genicanthus_caudovittatus:6.73087,Genicanthus_melanospilos:6.73087):11.7339):0.880599,Pygoplites_diacanthus:19.3454):2.85671):2.8393,((Centropyge_multispinis:0.089799,Apolemichthys_xanthurus:0.089799):19.856,Apolemichthys_trimaculatus:19.9458):5.09552):2.69849):11.8531):10.2758,((Chaetodontoplus_mesoleucus:14.7335,Chaetodontoplus_duboulayi:14.7335):9.37342,((Chaetodontoplus_caeruleopunctatus:8.63456,Chaetodontoplus_meredithi:8.63456):3.06669,Chaetodontoplus_melanosoma:11.7013):12.4056):25.7618):35.1803,(((Leiognathus_longispinis:29.6191,(Leiognathus_equulus:26.261,(Leiognathus_fasciatus:23.0426,Leiognathus_robustus:23.0426):3.21842):3.35812):15.9428,((((((Equulites_moretoniensis:15.4819,(Equulites_elongatus:12.8801,Gazza_minuta:12.8801):2.6018):0.090263,(Equulites_leuciscus:13.4215,Equulites_stercorarius:13.4215):2.15067):5.93123,Equulites_laterofenestra:21.5034):6.85682,Leiognathus_lineolatus:28.3602):11.3573,(((Secutor_indicius:2.14306,Secutor_insidiator:2.14306):18.6856,(Secutor_megalolepis:13.8631,(Secutor_hanedai:7.75792,Secutor_ruconius:7.75792):6.10518):6.96552):13.8411,((((Eubleekeria_splendens:9.58334,Eubleekeria_jonesi:9.58334):6.16453,(Leiognathus_panayensis:13.22383,Leiognathus_aureus:13.2238):2.52403):15.6053,(Gazza_achlamys:20.9725,Gazza_squamiventralis:20.9725):10.3807):3.23343,Gazza_rhombea:34.5866):0.083153):5.04785):0.062447,((Nuchequula_blochii:17.8927,(Nuchequula_mannusella:9.08898,(Nuchequula_gerreoides:6.9807,Nuchequula_nuchalis:6.9807):2.10828):8.8037):11.221,(Leiognathus_dussumieri:25.5066,Leiognathus_daura:25.5066):3.60707):10.6664):5.78186):35.1012,((((Prognathodes_marcellae:14.2811,Prognathodes_aculeatus:14.2811):6.72714,(Prognathodes_falcifer:11.689,Prognathodes_aya:11.689):9.31926):19.2211,((((((Chaetodon_adiergastos:7.39305,(Chaetodon_fasciatus:2.69855,Chaetodon_lunula:2.69855):4.69451):10.5291,((((Chaetodon_vagabundus:5.32866,(Chaetodon_auriga:4.18287,Chaetodon_decussatus:4.18287):1.14579):3.68051,((Chaetodon_semilarvatus:5.61098,((Chaetodon_oxycephalus:3.27811,(Chaetodon_ulietensis:1.7181,Chaetodon_falcula:1.7181):1.56):0.302431,Chaetodon_lineolatus:3.58054):2.03044):2.96965,(Chaetodon_flavirostris:6.18219,(Chaetodon_collare:4.64103,Chaetodon_auripes:4.64103):1.54116):2.39844):0.428534):1.31316,Chaetodon_mesoleucos:10.3223):1.33075,Chaetodon_rafflesii:11.6531):6.26912):3.03809,(Chaetodon_ephippium:11.1599,Chaetodon_semeion:11.1599):9.80042):2.54289,(((Chaetodon_humeralis:15.5358,Chaetodon_ocellatus:15.5358):4.78043,(Chaetodon_striatus:14.7438,Chaetodon_capistratus:14.7438):5.5724):2.38249,(Chaetodon_selene:18.1164,(Chaetodon_melannotus:6.19151,Chaetodon_ocellicaudus:6.19151):11.9249):4.58232):0.804447):5.347,((((Parachaetodon_ocellatus:15.6669,Chaetodon_trifascialis:15.6669):7.10173,(Chaetodon_tricinctus:21.073,((Chaetodon_rainfordi:9.23919,(Chaetodon_octofasciatus:1.85136,Chaetodon_aureofasciatus:1.85136):7.38783):10.8929,(Chaetodon_bennetti:10.8945,((Chaetodon_speculum:5.74283,Chaetodon_zanzibarensis:5.74283):3.25365,Chaetodon_plebeius:8.99649):1.89802):9.23763):0.940832):1.69568):1.05449,(Chaetodon_larvatus:12.8975,Chaetodon_baronessa:12.8975):10.9256):2.95131,(((Chaetodon_austriacus:2.19963,Chaetodon_trifasciatus:2.19963):20.8737,(Chaetodon_robustus:12.7597,Chaetodon_hoefleri:12.7597):10.3136):0.820366,(Chaetodon_reticulatus:7.02556,(Chaetodon_meyeri:4.01902,Chaetodon_ornatissimus:4.01902):3.00655):16.8681):2.88078):2.07571):1.72062,(((Chaetodon_interruptus:1.50273,Chaetodon_unimaculatus:1.50273):7.78926,(Chaetodon_trichrous:1.6586,Chaetodon_kleinii:1.6586):7.6334):15.7195,(Chaetodon_blackburnii:22.5026,(((((Chaetodon_mertensii:1.93871,(Chaetodon_madagaskariensis:0.873329,Chaetodon_paucifasciatus:0.873329):1.06538):2.07521,Chaetodon_xanthurus:4.01392):12.3782,(Chaetodon_melapterus:12.6684,Chaetodon_tinkeri:12.6684):3.72369):1.5846,(((Chaetodon_sanctaehelenae:4.06641,(((Chaetodon_miliaris:2.04801,Chaetodon_guentheri:2.04801):0.776821,Chaetodon_dolosus:2.82483):0.557105,Chaetodon_sedentarius:3.38193):0.684475):7.56057,(Chaetodon_multicinctus:2.24721,((Chaetodon_punctatofasciatus:1.64923,Chaetodon_guttatissimus:1.64923):0.281874,Chaetodon_pelewensis:1.9311):0.316101):9.37978):5.69187,(Chaetodon_citrinellus:8.12903,Chaetodon_quadrimaculatus:8.12903):9.18983):0.657848):1.50246,Chaetodon_fremblii:19.4792):3.02347):2.5089):5.55925):9.65853):10.5187,((((((Coradion_chrysozonus:1.90638,Coradion_altivelis:1.90638):3.76152,Coradion_melanopus:5.6679):16.3376,(Chelmon_rostratus:7.46041,(Chelmon_marginalis:6.9246,Chelmon_muelleri:6.9246):0.535811):14.5451):2.43764,(Chelmonops_curiosus:2.2503,Chelmonops_truncatus:2.2503):22.1928):13.3196,(Amphichaetodon_howensis:20.1884,Amphichaetodon_melbae:20.1884):17.5744):4.06135,((Forcipiger_flavissimus:15.8772,Forcipiger_longirostris:15.8772):14.5085,((Hemitaurichthys_thompsoni:8.6025,(Hemitaurichthys_polylepis:0.211289,Hemitaurichthys_zoster:0.211289):8.39121):18.2481,(((Heniochus_pleurotaenia:4.43487,Heniochus_varius:4.43487):15.5375,((Heniochus_acuminatus:0.482603,Heniochus_diphreutes:0.482603):10.6558,(Heniochus_monoceros:0.111375,Heniochus_singularius:0.111375):11.0271):8.83391):2.31821,(Heniochus_chrysostomus:20.8946,Johnrandallia_nigrirostris:20.8946):1.39598):4.56004):3.5351):11.4384):8.92387):29.9151):4.38593):3.6752,((Centrarchops_chapini:30.1904,Dinoperca_petersi:30.1904):31.2438,(Luvarus_imperialis:57.3717,((((Naso_caeruleacauda:17.3148,(((((Naso_maculatus:3.24616,Naso_reticulatus:3.24616):4.00538,((Naso_caesius:0.752637,Naso_hexacanthus:0.752637):5.00758,(Naso_vlamingii:5.22542,Naso_brevirostris:5.22542):0.5348):1.49132):0.063116,(Naso_unicornis:5.22345,(Naso_elegans:2.82025,Naso_lituratus:2.82025):2.40321):2.0912):3.41652,((Naso_annulatus:6.01932,(Naso_tonganus:2.24311,Naso_tuberosus:2.24311):3.77621):1.19198,(Naso_lopezi:7.09875,((Naso_mcdadei:4.46614,Naso_fageni:4.46614):1.89073,Naso_brachycentron:6.35687):0.741877):0.112558):3.51987):3.95574,Naso_thynnoides:14.6869):2.6279):0.408233,Naso_minor:17.7231):32.2769,((Zebrasoma_flavescens:38.781,(((Prionurus_maculatus:13.4231,Prionurus_scalprum:13.4231):0.310005,Prionurus_laticlavius:13.7332):9.00577,Prionurus_microlepidotus:22.7389):16.0421):4.73059,(((((Ctenochaetus_strigosus:10.3978,Acanthurus_xanthopterus:10.3978):8.29976,(((Acanthurus_pyroferus:12.4371,Acanthurus_triostegus:12.4371):2.62701,((((Acanthurus_bahianus:4.69104,Acanthurus_chirurgus:4.69104):4.1836,Acanthurus_nigrofuscus:8.87464):0.070632,Acanthurus_nigroris:8.94528):2.5692,Acanthurus_coeruleus:11.5145):3.54962):1.48233,(Acanthurus_guttatus:14.4161,(((Ctenochaetus_cyanocheilus:7.11097,(Acanthurus_nubilus:4.0295,Ctenochaetus_hawaiiensis:4.0295):3.08147):1.51988,Ctenochaetus_striatus:8.63084):3.85152,((Acanthurus_japonicus:0.084365,Acanthurus_nigricans:0.084365):9.45741,Ctenochaetus_binotatus:9.54177):2.94059):1.93375):2.13032):2.15109):0.128965,Acanthurus_mata:18.8265):3.09441,(Acanthurus_blochii:16.552,((Acanthurus_thompsoni:3.54863,Acanthurus_olivaceus:3.54863):9.69396,Acanthurus_dussumieri:13.2426):3.30942):5.36889):17.1084,(Zebrasoma_scopas:16.119,(Zebrasoma_velifer:9.22678,Paracanthurus_hepatus:9.22678):6.89223):22.9103):4.48231):6.48843):3.90017,Zanclus_cornutus:53.9002):3.47156):4.06241):27.2901):4.66462):1.31527):1.88563):1.79737):1.96744):4.6382):1.54063,(((((Liopropoma_eukrines:30.2221,Liopropoma_carmabi:30.2221):32.0353,(((((Cephalopholis_leopardus:17.2133,Cephalopholis_taeniops:17.2133):7.41526,(Cephalopholis_miniata:17.107,(Cephalopholis_sonnerati:11.0558,Cephalopholis_urodeta:11.0558):6.05116):7.52151):1.6767,(Cephalopholis_fulva:19.4391,(Paranthias_colonus:11.6679,Paranthias_furcifer:11.6679):7.77121):6.86614):15.5262,(((Aethaloperca_rogaa:23.6993,(((Cephalopholis_formosa:19.0975,(Cephalopholis_cyanostigma:16.5721,Cephalopholis_boenak:16.5721):2.52545):1.65885,(Cephalopholis_cruentata:8.55855,Cephalopholis_panamensis:8.55855):12.1978):2.80029,Cephalopholis_nigri:23.5566):0.142654):14.6481,(((Hyporthodus_flavolimbatus:27.3944,((((Epinephelus_daemelii:20.0334,((Epinephelus_morrhua:15.0795,Cromileptes_altivelis:15.0795):3.61249,((Epinephelus_andersoni:13.7897,Epinephelus_polyphekadion:13.7897):4.60174,(Epinephelus_ongus:15.0056,(Epinephelus_corallicola:5.6582,Epinephelus_coeruleopunctatus:5.6582):9.34742):3.3858):0.300588):1.34139):1.60431,((Epinephelus_bruneus:19.1144,((Epinephelus_itajara:9.55203,Epinephelus_lanceolatus:9.55203):8.62496,((((Epinephelus_maculatus:3.7956,Epinephelus_tauvina:3.7956):4.15133,Epinephelus_rivulatus:7.94693):1.39422,Epinephelus_coioides:9.34115):1.81647,Epinephelus_malabaricus:11.1576):7.01938):0.937433):1.21717,(Epinephelus_tukula:18.7097,(Epinephelus_latifasciatus:17.3697,(Anyperodon_leucogrammicus:15.693,(((Epinephelus_howlandi:7.03762,(Epinephelus_striatus:5.95274,Epinephelus_spilotoceps:5.95274):1.08488):1.4727,Epinephelus_hexagonatus:8.51032):1.73264,Epinephelus_fuscoguttatus:10.243):5.45):1.67674):1.33997):1.62192):1.30611):1.90586,Epinephelus_aeneus:23.5436):2.26946,(((Epinephelus_caninus:10.6416,Epinephelus_goreensis:10.6416):4.91961,((((Mycteroperca_bonaci:7.92307,Mycteroperca_venenosa:7.92307):3.1398,((Triso_dermopterus:10.7555,Mycteroperca_jordani:10.7555):0.148178,Mycteroperca_tigris:10.9036):0.159237):2.28328,(Mycteroperca_rosacea:13.0601,Mycteroperca_olfax:13.0601):0.286047):0.351963,(((Mycteroperca_interstitialis:9.08897,(Mycteroperca_phenax:0.280012,Mycteroperca_xenarcha:0.280012):8.80896):4.25696,Epinephelus_guttatus:13.3459):0.185008,((Epinephelus_amblycephalus:7.44024,(Epinephelus_epistictus:4.71364,Epinephelus_radiatus:4.71364):2.7266):5.27196,(((((Mycteroperca_prionura:3.71349,Epinephelus_albomarginatus:3.71349):2.33497,Epinephelus_marginatus:6.04846):4.16585,Mycteroperca_fusca:10.2143):1.69435,((Mycteroperca_acutirostris:5.28512,Mycteroperca_rubra:5.28512):1.82637,Epinephelus_costae:7.11149):4.79718):0.08713,Mycteroperca_microlepis:11.9958):0.716409):0.818732):0.167172):1.86312):9.35207,(((((Epinephelus_multinotatus:9.8248,((Epinephelus_miliaris:7.5553,Epinephelus_areolatus:7.5553):0.074012,Epinephelus_undulosus:7.62931):2.19549):0.423457,(Epinephelus_flavocaeruleus:2.61298,Epinephelus_cyanopodus:2.61298):7.63528):5.53023,Epinephelus_bleekeri:15.7785):2.69959,((((Epinephelus_analogus:8.88021,(Epinephelus_clippertonensis:0.665384,Epinephelus_labriformis:0.665384):8.21482):0.127767,Epinephelus_adscensionis:9.00797):6.27874,(((((Epinephelus_chlorostigma:2.59706,Epinephelus_fasciatomaculosus:2.59706):5.31317,Epinephelus_awoara:7.91024):3.5043,Epinephelus_akaara:11.4145):1.50575,(Epinephelus_retouti:8.78167,(Epinephelus_diacanthus:8.65168,Epinephelus_stictus:8.65168):0.129995):4.13862):0.187936,Epinephelus_sexfasciatus:13.1082):2.17849):2.65982,(Epinephelus_undulatostriatus:17.6626,((Epinephelus_morio:15.5277,(Epinephelus_fasciatus:12.0407,(Epinephelus_melanostigma:1.79498,Epinephelus_merra:1.79498):10.2457):3.48706):2.04064,(Epinephelus_quoyanus:9.82502,(Epinephelus_macrospilos:6.42241,Epinephelus_trimaculatus:6.42241):3.40262):7.74334):0.09428):0.283894):0.531535):2.69179,Epinephelus_longispinis:21.1699):3.74344):0.89973):1.58141):0.140178,(Hyporthodus_acanthistius:20.9894,((Hyporthodus_exsul:14.8808,(Hyporthodus_nigritus:11.6528,Hyporthodus_niveatus:11.6528):3.22801):5.89453,((Hyporthodus_ergastularius:10.6907,(Hyporthodus_quernus:10.2489,Hyporthodus_octofasciatus:10.2489):0.441849):9.9255,(Epinephelus_cifuentesi:18.9681,((Epinephelus_drummondhayi:16.5426,(Dermatolepis_dermatolepis:10.0536,((Alphestes_afer:3.22518,(Alphestes_immaculatus:2.64273,Alphestes_multiguttatus:2.64273):0.582444):5.5944,(Dermatolepis_inermis:6.69492,Dermatolepis_striolata:6.69492):2.12466):1.23399):6.48902):1.25495,(Hyporthodus_haifensis:13.0331,Hyporthodus_septemfasciatus:13.0331):4.76442):1.17054):1.64813):0.159171):0.213985):6.54525):6.4119,(Hyporthodus_mystacinus:23.1206,Hyporthodus_niphobles:23.1206):10.8259):4.40085):0.130529,(Cephalopholis_polleni:17.9615,(Cephalopholis_igarashiensis:13.7119,Gracila_albomarginata:13.7119):4.24962):20.5164):3.35348):16.0775,(Variola_albimarginata:9.45649,Variola_louti:9.45649):48.4523):4.34851):11.3945,(((Rypticus_bicolor:12.2641,(Rypticus_saponaceus:7.9721,Rypticus_nigripinnis:7.9721):4.29202):33.2903,((Pseudogramma_gregoryi:8.28185,Pseudogramma_thaumasia:8.28185):33.81452,(Pogonoperca_punctata:11.8883,Grammistes_sexlineatus:11.8883):30.208):3.45812):23.7448,(Diploprion_bifasciatum:62.1711,(Belonoperca_chabanaudi:57.6481,(Saloptia_powelli:27.3881,(((Plectropomus_oligacanthus:6.03943,Plectropomus_laevis:6.03943):9.1934,(Plectropomus_leopardus:6.96431,(Plectropomus_pessuliferus:0.240769,Plectropomus_maculatus:0.240769):6.72354):8.26852):0.099473,Plectropomus_areolatus:15.3323):12.0557):30.2601):4.52303):7.12812):4.35262):11.2024,(Plectranthias_kelloggi:70.5384,(((Luzonichthys_waitei:53.4275,(((Pseudanthias_pleurotaenia:12.3144,Tosana_niwae:12.3144):32.626,(Pseudanthias_squamipinnis:21.189,(Nemanthias_carberryi:1.25978,Pseudanthias_tuka:1.25978):19.9292):23.7514):6.6674,(Anthias_anthias:27.2896,Pronotogrammus_multifasciatus:27.2896):24.3181):1.81978):3.55644,Odontanthias_chrysostictus:56.984):3.99445,(Pseudogramma_polyacantha:48.7179,(Pseudanthias_lori:44.9394,(Hemanthias_leptus:25.9134,(Hemanthias_signifer:6.59248,Hemanthias_peruanus:6.59248):19.3209):19.0261):3.77843):12.2606):9.55999):14.3158):8.35483,(((((Caesioperca_lepidoptera:43.0746,Plectranthias_japonicus:43.0746):28.9208,((Eleginops_maclovinus:43.0837,(((Aethotaxis_mitopteryx_mitopteryx:18.6096,(Dissostichus_eleginoides:14.5004,Dissostichus_mawsoni:14.5004):4.10914):5.21811,((Notothenia_rossii:11.9933,(Notothenia_coriiceps:11.8503,(Paranotothenia_magellanica:9.20283,Notothenia_angustata:9.20283):2.64743):0.14301):9.91789,((Pleuragramma_antarctica:18.469,(Gobionotothen_acuta:11.602,Gobionotothen_gibberifrons:11.602):6.86705):1.55461,(((((Lepidonotothen_mizops:5.60147,Lepidonotothen_larseni:5.60147):3.51601,(Lepidonotothen_nudifrons:6.84868,Lepidonotothen_squamifrons:6.84868):2.2688):1.05107,((Patagonotothen_brevicauda_brevicauda:1.91204,(Patagonotothen_guntheri:0.053147,Patagonotothen_ramsayi:0.053147):1.85889):2.12205,Patagonotothen_tessellata:4.03409):6.13446):4.93174,((Cryothenia_amphitreta:0.172289,Trematomus_scotti:0.172289):10.7647,(Pagothenia_borchgrevinki:8.00572,(((Trematomus_hansoni:6.178,(Trematomus_bernacchii:3.26317,Trematomus_vicarius:3.26317):2.91482):0.922547,Trematomus_nicolai:7.10054):0.105798,((Trematomus_pennellii:3.45478,(Trematomus_eulepidotus:3.33647,Trematomus_lepidorhinus:3.33647):0.118309):0.418026,(Trematomus_tokarevi:2.52947,Trematomus_loennbergii:2.52947):1.34333):3.33354):0.799382):2.93123):4.16334):1.19705,Notothenia_cyanobrancha:16.2973):3.72627):1.88755):1.91651):2.6483,((Channichthys_rhinoceratus:14.5767,((Neopagetopsis_ionah:7.21648,((Chionodraco_rastrospinosus:3.12854,Pseudochaenichthys_georgianus:3.12854):2.25083,(Pagetopsis_maculatus:2.76828,Pagetopsis_macropterus:2.76828):2.61109):1.83711):4.1215,(((Chaenocephalus_aceratus:4.49651,Cryodraco_antarcticus:4.49651):6.29528,((Dacodraco_hunteri:2.82151,(Chionodraco_hamatus:2.56303,Chionodraco_myersi:2.56303):0.258477):7.81165,Champsocephalus_esox:10.6332):0.158621):0.235409,Chaenodraco_wilsoni:11.0272):0.310794):3.23876):3.21746,(((Artedidraco_shackletoni:7.07144,Histiodraco_velifer:7.07144):10.3118,Dolloidraco_longedorsalis:17.3832):0.245385,((Racovitzia_glacialis:13.3183,((Gymnodraco_acuticeps:12.7466,((Parachaenichthys_charcoti:8.9878,Gerlachea_australis:8.9878):0.159252,Prionodraco_evansii:9.14705):3.59951):0.25788,(Akarotaxis_nudiceps:9.30882,(Bathydraco_macrolepis:5.58183,Bathydraco_marri:5.58183):3.72698):3.69562):0.31389):4.12704,(Harpagifer_antarcticus:5.00876,Harpagifer_kerguelensis:5.00876):12.4366):0.183224):0.165624):8.68176):16.6078):20.7576,(Pseudaphritis_urvillii:63.4116,(Cottoperca_gobio:24.6682,Bovichtus_variegatus:24.6682):38.7434):0.429728):8.15402):14.6097,((Bembrops_heterurus:76.5057,(((((((Ammocrypta_vivax:8.26605,Ammocrypta_meridiana:8.26605):0.532091,(Ammocrypta_beanii:0.406111,Ammocrypta_bifascia:0.406111):8.39203):8.23894,(Ammocrypta_pellucida:9.98306,Ammocrypta_clara:9.98306):7.05403):10.434,Crystallaria_asprella:27.4711):7.06512,((((((((Percina_smithvanizi:2.86569,Percina_kusha:2.86569):9.24572,Percina_palmaris:12.1114):4.30848,(Percina_aurantiaca:14.1479,Percina_evides:14.1479):2.27196):0.804838,(((((Percina_burtoni:5.1351,Percina_caprodes:5.1351):0.348479,(Percina_carbonaria:2.50084,(Percina_macrolepida:2.28067,(((Percina_bimaculata:1.28853,(Percina_austroperca:0.627489,Percina_kathae:0.627489):0.661039):0.507121,Percina_suttkusi:1.79565):0.240586,Percina_fulvitaenia:2.03624):0.244436):0.22017):2.98274):2.07048,Percina_jenkinsi:7.55406):2.07931,Percina_rex:9.63337):6.4276,(((Percina_gymnocephala:11.8867,((Percina_sciera:1.89579,(Percina_sipsi:1.39449,Percina_nigrofasciata:1.39449):0.501296):3.81457,Percina_aurolineata:5.71036):6.1763):1.45346,(((Percina_stictogaster:11.3425,Percina_cymatotaenia:11.3425):0.614514,((Percina_nasuta:3.02261,Percina_phoxocephala:3.02261):3.76511,(Percina_oxyrhynchus:3.78447,Percina_squamata:3.78447):3.00325):5.16927):0.575682,(Percina_notogramma:2.63732,(Percina_maculata:1.75178,Percina_pantherina:1.75178):0.885538):9.89535):0.807443):1.08993,(Percina_lenticula:13.3693,((Percina_copelandi:8.94515,(Percina_aurora:2.6783,Percina_brevicauda:2.6783):6.26685):3.48633,((Percina_tanasi:0.89645,Percina_uranidea:0.89645):10.5576,((Percina_shumardi:8.13188,Percina_vigil:8.13188):2.75545,Percina_antesella:10.8873):0.566673):0.977465):0.937799):1.06077):1.63092):1.16377):1.32158,Percina_macrocephala:18.5463):4.5871,(((Percina_nevisense:1.67284,Percina_peltata:1.67284):5.56454,Percina_crassa:7.23738):11.1374,Percina_roanoka:18.3747):4.75867):8.21942,(Etheostoma_juliae:22.7638,((((Etheostoma_douglasi:3.00346,Etheostoma_etowahae:3.00346):0.697576,Etheostoma_jordani:3.70104):10.1472,Etheostoma_chuckwachatte:13.8482):3.5969,((Etheostoma_tippecanoe:4.94456,Etheostoma_denoncourti:4.94456):11.5126,(Etheostoma_acuticeps:14.9127,(((Etheostoma_moorei:3.58237,Etheostoma_rubrum:3.58237):2.81189,(Etheostoma_rufilineatum:5.42187,(Etheostoma_chlorobranchium:5.23259,(Etheostoma_camurum:1.58053,Etheostoma_bellum:1.58053):3.65206):0.189277):0.972393):2.02682,((Etheostoma_wapiti:2.7548,Etheostoma_vulneratum:2.7548):3.14871,((Etheostoma_sanguifluum:2.47949,(Etheostoma_maculatum:1.5774,Etheostoma_microlepidum:1.5774):0.902093):1.21125,Etheostoma_aquali:3.69074):2.21277):2.51757):6.49159):1.5445):0.987926):5.31869):8.58904):2.43756,((((((Etheostoma_kanawhae:0.656583,Etheostoma_osburni:0.656583):12.3231,((Etheostoma_nianguae:7.6501,Etheostoma_sagitta:7.6501):3.43394,((Etheostoma_variatum:7.5109,Etheostoma_tetrazonum:7.5109):1.0261,Etheostoma_euzonum:8.537):2.54704):1.89562):13.3028,(((Etheostoma_histrio:22.3829,(((((Etheostoma_tennesseense:2.25607,Etheostoma_simoterum:2.25607):3.38909,(Etheostoma_planasaxatile:2.74065,(Etheostoma_occidentale:0.333182,Etheostoma_atripinne:0.333182):2.40747):2.90452):6.90876,(Etheostoma_barrenense:5.70922,Etheostoma_rafinesquei:5.70922):6.8447):4.83767,(Etheostoma_zonale:5.28965,Etheostoma_lynceum:5.28965):12.1019):2.93888,(((Etheostoma_rupestre:8.71885,Etheostoma_blennioides:8.71885):1.58459,Etheostoma_blennius:10.3034):3.31725,(Etheostoma_swannanoa:11.8924,(Etheostoma_thalassinum:7.30598,Etheostoma_inscriptum:7.30598):4.58642):1.72829):6.70979):2.05245):1.07764,(Etheostoma_baileyi:21.3512,((Etheostoma_raneyi:13.9199,((Etheostoma_zonistium:1.12221,(Etheostoma_cervus:0.6547,Etheostoma_pyrrhogaster:0.6547):0.467512):11.7567,((Etheostoma_tallapoosae:9.75169,(Etheostoma_ramseyi:8.10503,Etheostoma_brevirostrum:8.10503):1.64666):2.37772,(Etheostoma_etnieri:10.2083,(Etheostoma_colorosum:8.14031,((Etheostoma_bellator:4.73061,Etheostoma_chermocki:4.73061):1.23725,Etheostoma_lachneri:5.96786):2.17245):2.06802):1.92108):0.749452):1.04101):5.61077,((Etheostoma_scotti:10.3416,Etheostoma_coosae:10.3416):4.69192,(Etheostoma_duryi:7.37397,Etheostoma_flavum:7.37397):7.65958):4.49709):1.82058):2.10934):1.72196,((((Etheostoma_barbouri:19.9827,(((Etheostoma_flabellare:13.4655,Etheostoma_percnurum:13.4655):3.6511,(Etheostoma_basilare:14.9968,(Etheostoma_obeyense:9.16864,(Etheostoma_virgatum:7.89591,((Etheostoma_striatulum:1.85246,Etheostoma_smithi:1.85246):3.56973,Etheostoma_derivativum:5.42219):2.47372):1.27274):5.82818):2.11973):1.55198,Etheostoma_kennicotti:18.6685):1.31417):3.05471,((Etheostoma_squamiceps:7.86285,(Etheostoma_olivaceum:3.64415,Etheostoma_crossopterum:3.64415):4.21871):10.6859,((Etheostoma_pseudovulatum:8.45571,(Etheostoma_forbesi:4.93445,((Etheostoma_neopterum:1.36621,Etheostoma_nigripinne:1.36621):1.87958,Etheostoma_corona:3.24578):1.68866):3.52127):3.23656,(Etheostoma_oophylax:3.00948,Etheostoma_chienense:3.00948):8.6828):6.85652):4.48861):0.358435,(Etheostoma_fragi:18.8202,((((Etheostoma_radiosum:7.08075,Etheostoma_whipplei:7.08075):6.60216,Etheostoma_tuscumbia:13.6829):1.32599,((Etheostoma_ditrema:6.81201,(Etheostoma_asprigene:5.2767,Etheostoma_collettei:5.2767):1.5353):0.860136,Etheostoma_caeruleum:7.67214):7.33676):1.0661,(Etheostoma_exile:11.5111,Etheostoma_luteovinctum:11.5111):4.56394):2.74519):4.57565):0.519234,(((Etheostoma_susanae:4.69624,(Etheostoma_nigrum:1.07323,Etheostoma_podostemone:1.07323):3.623):4.1439,(Etheostoma_olmstedi:5.79859,Etheostoma_perlongum:5.79859):3.04154):4.14174,(Etheostoma_longimanum:5.15973,Etheostoma_vitreum:5.15973):7.82214):10.9332):1.26746):1.09992):0.799873,((Etheostoma_stigmaeum:20.4153,Etheostoma_chlorosoma:20.4153):4.67291,((((Etheostoma_fusiforme:15.2849,(Etheostoma_mariae:13.4822,Etheostoma_parvipinne:13.4822):1.80276):4.39051,((Etheostoma_saludae:10.828,Etheostoma_collis:10.828):6.94216,Etheostoma_gracile:17.7702):1.90526):2.29702,Etheostoma_serrifer:21.9725):0.120004,Etheostoma_edwini:22.0925):2.9957):1.99414):0.968498,((Etheostoma_punctulatum:18.5687,((Etheostoma_bison:7.04947,(Etheostoma_tecumsehi:5.61687,((Etheostoma_spectabile:3.83337,Etheostoma_kantuckeense:3.83337):0.844331,Etheostoma_lawrencei:4.6777):0.939169):1.4326):2.8632,Etheostoma_burri:9.91267):8.65602):3.60531,(Etheostoma_microperca:19.7357,(Etheostoma_fonticola:5.06865,Etheostoma_proeliare:5.06865):14.6671):2.43828):5.87682):2.77118,Etheostoma_cinereum:30.822):2.96839):0.745792):7.86697,(((Gymnocephalus_baloni:8.45816,(Gymnocephalus_cernua:6.01732,Gymnocephalus_schraetser:6.01732):2.44084):22.0623,((Sander_canadensis:8.57924,Sander_vitreus:8.57924):10.5948,((Zingel_streber:11.7232,(Zingel_zingel:8.32902,Romanichthys_valsanicola:8.32902):3.39414):7.29433,(Sander_lucioperca:7.04795,Sander_volgensis:7.04795):11.9695):0.156589):11.3464):4.96712,(Perca_fluviatilis:18.2798,(Perca_flavescens:12.178,Perca_schrenkii:12.178):6.10181):17.2078):6.91552):20.9418,Niphon_spinosus:63.345):13.1608):7.95548,((Echiichthys_vipera:27.2285,(Trachinus_collignoni:27.0523,(Trachinus_radiatus:17.2727,Trachinus_draco:17.2727):9.77959):0.17618):49.7686,(Centropristis_striata:63.7144,(((Serranus_psittacinus:26.3558,Serranus_baldwini:26.3558):29.2326,(((Serranus_scriba:17.3506,(Serranus_atricauda:12.0226,Serranus_cabrilla:12.0226):5.32804):11.5327,(Serranus_accraensis:20.1556,Serranus_hepatus:20.1556):8.72779):15.8543,((((((Paralabrax_albomaculatus:16.2889,(Paralabrax_callaensis:12.5886,Cratinus_agassizii:12.5886):3.70024):1.6336,(Paralabrax_dewegeri:17.7768,(Paralabrax_loro:15.1827,Paralabrax_nebulifer:15.1827):2.59411):0.145639):0.099369,Paralabrax_auroguttatus:18.0218):0.203419,Paralabrax_humeralis:18.2253):0.231751,Paralabrax_maculatofasciatus:18.457):9.39459,Paralabrax_clathratus:27.8516):16.886):10.8508):2.70601,((Serranus_phoebe:40.186,((Diplectrum_maximum:7.82098,Diplectrum_formosum:7.82098):0.099094,Diplectrum_pacificum:7.92007):32.2659):12.5166,(((Serranus_tortugarum:15.6391,Serranus_tabacarius:15.6391):1.70679,Serranus_tigrinus:17.3459):22.1764,((Hypoplectrus_gemma:2.1154,(Hypoplectrus_gummigutta:1.85713,Hypoplectrus_chlorurus:1.85713):0.258274):0.741086,((((Hypoplectrus_guttavarius:1.32782,Hypoplectrus_unicolor:1.32782):0.337568,(Hypoplectrus_aberrans:0.938831,Hypoplectrus_nigricans:0.938831):0.726562):0.394826,Hypoplectrus_indigo:2.06022):0.655554,Hypoplectrus_puella:2.71577):0.140713):36.6658):13.1803):5.59183):5.41998):13.2826):7.46417):2.14389):2.93651,(((((((Cryptacanthodes_giganteus:41.7084,((Ptilichthys_goodei:33.108,(((Pholis_nebulosa:3.8594,Pholis_fangi:3.8594):9.89952,(Apodichthys_flavidus:7.53233,Pholis_crassispina:7.53233):6.22659):9.30389,(Pholis_gunnellus:8.90589,Pholis_ornata:8.90589):14.1569):10.0452):7.48114,(((((((((Plectobranchus_evides:17.8656,(((Alectrias_alectrolophus:2.14443,Anoplarchus_purpurescens:2.14443):3.29555,Chirolophis_nugator:5.43998):8.92472,(Cebidichthys_violaceus:14.2654,Ernogrammus_hexagrammus:14.2654):0.099284):3.50091):0.100717,(Esselenichthys_carli:12.1866,(Opisthocentrus_tenuis:9.60861,Pholidapus_dybowskii:9.60861):2.57797):5.77975):2.32521,Stichaeus_grigorjewi:20.2915):0.68333,Lumpenus_lampretaeformis:20.9749):8.42167,Chirolophis_japonicus:29.3965):0.08062,(Chirolophis_decoratus:27.7734,Kasatkia_seigeli:27.7734):1.70376):0.049716,((Bathymaster_derjugini:5.50774,(Bathymaster_signatus:5.04368,Bathymaster_leurolepis:5.04368):0.464064):12.4565,(Rathbunella_hypoplecta:13.0856,Ronquilus_jordani:13.0856):4.87866):11.5626):7.60849,Zaprora_silenus:37.1353):2.85077,((Anarrhichthys_ocellatus:13.1127,(Anarhichas_minor:2.30652,Anarhichas_lupus:2.30652):10.8062):12.6294,(Neozoarces_pulcher:25.5861,(Gymnelopsis_ochotensis:23.0204,((Bilabria_ornata:13.3042,(Davidijordania_lacertina:11.2639,(Hadropareia_middendorffii:3.86908,Magadanichthys_skopetsi:3.86908):7.39478):2.04038):8.77025,((Gymnelus_viridis:18.5331,(Zoarces_gillii:14.8093,(Zoarces_americanus:10.3247,((Zoarces_elongatus:1.97166,(Zoarces_fedorovi:1.27983,Zoarces_viviparus:1.27983):0.69183):2.14826,Zoarces_andriashevi:4.11992):6.20477):4.48464):3.72374):2.47285,((Gymnelus_hemifasciatus:6.06604,Lycozoarces_regani:6.06604):12.2949,(((((Lycodes_brevipes:8.44127,((Lycodes_nakamurae:7.34105,Lycodes_esmarkii:7.34105):0.862649,(((Lycodes_eudipleurostictus:1.92113,Lycodes_mcallisteri:1.92113):4.87946,(Lycodes_paamiuti:4.13985,Lycodes_pallidus:4.13985):2.66074):0.681186,Lycodes_gracilis:7.48178):0.721924):0.237572):0.945113,(((Lycodes_reticulatus:2.31,Lycodes_rossi:2.31):5.08462,((Lycodapus_antarcticus:5.63063,(((Lyconema_barbatum:2.78727,Austrolycus_depressiceps:2.78727):1.72038,Lycodes_tanakae:4.50765):0.079273,Lycodes_mucosus:4.58692):1.04371):0.734987,(Lycodes_seminudus:4.03447,Lycodes_raridens:4.03447):2.33115):1.02901):1.25345,(((Lycodes_adolfi:1.65471,Lycodes_terraenovae:1.65471):5.06864,(Lycodes_fulvus:5.73425,(Lycodes_yamatoi:4.74407,(Lycodapus_fierasfer:3.72953,((Lycodes_concolor:0.956452,Lycodes_brunneofasciatus:0.956452):0.773563,Lycodes_soldatovi:1.73001):1.99952):1.01454):0.990181):0.989093):0.744644,(Lycodes_diapterus:7.30532,Lycodes_fasciatus:7.30532):0.162671):1.18009):0.73831):2.13252,(((Lycodes_cortezianus:2.23429,Lycodes_pacificus:2.23429):5.24413,((Bothrocarina_nigrocaudata:4.95381,Lycogrammoides_schmidti:4.95381):1.83106,Bothrocarina_microcephala:6.78487):0.693546):1.88565,(Bothrocara_hollandi:7.69311,Bothrocara_soldatovi:7.69311):1.67096):2.15484):0.625791,Lycodes_palearis:12.1447):3.98357,((Lycodes_toyamensis:5.2883,(Lycenchelys_crotalinus:4.06368,Lycodes_albonotatus:4.06368):1.22462):5.01142,(Lycenchelys_muraena:3.11958,Lycenchelys_sarsii:3.11958):7.18014):5.82855):2.2327):2.64496):1.06858):0.94594):2.56562):0.156092):14.244):0.603052):1.11922):7.48754,(((((Hexagrammos_lagocephalus:12.3581,(Hexagrammos_decagrammus:12.1815,(((Hexagrammos_agrammus:4.6408,Hexagrammos_otakii:4.6408):2.17039,Hexagrammos_stelleri:6.81119):1.94891,Hexagrammos_octogrammus:8.76009):3.42142):0.176604):22.87167,Ophiodon_elongatus:35.2298):8.35547,Oxylebius_pictus:43.5853):0.111286,((((((((Crystallichthys_cyclospilus:15.5756,(((Paraliparis_garmani:13.92,Paraliparis_bathybius:13.92):0.059932,((Rhinoliparis_barbulifer:9.44852,Paraliparis_copei_copei:9.44852):3.3978,(((Psednos_melanocephalus:0.061471,Psednos_micruroides:0.061471):1.2333,Psednos_groenlandicus:1.29478):7.414,Rhodichthys_regina:8.70878):4.13755):1.13365):0.919148,((Careproctus_cypselurus:3.13984,Careproctus_melanurus:3.13984):8.4228,(Careproctus_rastrinus:4.06272,Careproctus_reinhardti:4.06272):7.49992):3.33648):0.676453):6.23037,(((Liparis_rutteri:14.1865,Liparis_pulchellus:14.1865):1.99313,((Liparis_gibbus:7.24155,(Liparis_dennyi:0.543193,Liparis_mucosus:0.543193):6.69836):2.519,((Liparis_fabricii:6.94133,Liparis_inquilinus:6.94133):0.404558,(Liparis_liparis:1.23849,Liparis_montagui:1.23849):6.1074):2.41466):6.4191):3.80269,Liparis_florae:19.9823):1.82359):2.61509,Nectoliparis_pelagicus:24.421):6.05556,Liparis_fucensis:30.4766):4.41816,(Elassodiscus_tremebundus:8.27343,Elassodiscus_caudatus:8.27343):26.6213):0.052916,((Aptocyclus_ventricosus:17.8037,(Eumicrotremus_orbis:17.6308,(Eumicrotremus_derjugini:11.2792,Eumicrotremus_spinosus:11.2792):6.35162):0.172879):4.78734,Cyclopterus_lumpus:22.591):12.3566):4.68927,(Arctoscopus_japonicus:24.7284,Trichodon_trichodon:24.7284):14.9085):1.40137,(Jordania_zonope:37.1312,((((((((Cottus_princeps:4.87592,(Cottus_klamathensis:3.72692,Cottus_asperrimus:3.72692):1.149):5.27321,(((((Cottus_asper:1.06061,Cottus_marginatus:1.06061):0.125305,Cottus_gulosus:1.18591):0.698775,Cottus_perplexus:1.88469):3.25729,Cottus_pitensis:5.14198):1.16888,Cottus_aleuticus:6.31085):3.83827):3.78692,(((Cottus_greenei:9.31127,(Cottus_beldingii:5.05131,Cottus_leiopomus:5.05131):4.25996):1.84491,((Cottus_confusus:8.87429,((Comephorus_baikalensis:1.75193,Comephorus_dybowskii:1.75193):4.66689,(((Procottus_jeittelesii:1.11189,Procottus_major:1.11189):4.47282,(Cyphocottus_eurystomus:5.08266,((Abyssocottus_gibbosus:3.8797,(Limnocottus_bergianus:1.77478,((Limnocottus_godlewskii:0.351652,Limnocottus_griseus:0.351652):0.939443,Limnocottus_pallidus:1.2911):0.483689):2.10491):0.178716,(((Asprocottus_korjakovi:0.740648,Asprocottus_pulcher:0.740648):1.09702,(Asprocottus_herzensteini:0.975562,Asprocottus_platycephalus:0.975562):0.86211):2.02766,(Cottinella_boulengeri:3.43364,Abyssocottus_korotneffi:3.43364):0.431692):0.19308):1.02425):0.502046):0.158654,(((Batrachocottus_multiradiatus:4.12782,Batrachocottus_baicalensis:4.12782):0.226989,Batrachocottus_nikolskii:4.35481):1.2536,(Paracottus_knerii:5.51007,((Cottocomephorus_grewingkii:0.435789,Cottocomephorus_inermis:0.435789):3.58424,Leocottus_kesslerii:4.02003):1.49004):0.098342):0.134951):0.675454):2.45547):1.24175,((Cottus_girardi:6.45317,Cottus_hypselurus:6.45317):2.09343,((Cottus_extensus:2.49523,(Cottus_bendirei:0.20535,Cottus_hubbsi:0.20535):2.28988):3.72604,((Cottus_caeruleomentum:4.214,Cottus_bairdii:4.214):1.256,(Cottus_rhotheus:4.82477,(Cottus_cognatus:4.58434,(Cottus_paulus:2.83884,(Cottus_carolinae:2.61063,Cottus_baileyi:2.61063):0.228216):1.7455):0.240426):0.645234):0.751268):2.32534):1.56944):1.04014):0.652128,((Cottus_sibiricus:2.89852,Cottus_gobio:2.89852):0.319273,Cottus_ricei:3.2178):8.59051):2.12774):3.22835,((Cottus_pollux:12.3067,Cottus_reinii:12.3067):2.52799,((Cottus_amblystomopsis:0.871192,Cottus_nozawae:0.871192):11.8875,(Cottus_czerskii:10.2792,Cottus_hangiongensis:10.2792):2.4795):2.07598):2.32974):1.60037,Cottus_poecilopus:18.7648):8.02741,(Trachidermus_fasciatus:11.7966,Cottus_kazika:11.7966):14.9955):7.96434,((((((Ruscarius_meanyi:20.5346,Ruscarius_creaseri:20.5346):2.55506,(((Clinocottus_embryum:12.4194,(Clinocottus_globiceps:9.53051,Clinocottus_recalvus:9.53051):2.88891):6.05969,(((Clinocottus_analis:8.10471,Leiocottus_hirundo:8.10471):6.93319,(Orthonopias_triacis:13.8081,(Oligocottus_rubellio:12.0209,(Oligocottus_maculosus:9.37937,Oligocottus_snyderi:9.37937):2.64152):1.78724):1.22977):1.10612,Oligocottus_rimensis:16.144):2.3351):3.18283,(((Artedius_notospilotus:12.893,(Clinocottus_acuticeps:9.91914,Artedius_harringtoni:9.91914):2.97381):2.17339,Artedius_fenestralis:15.0663):4.12121,(Artedius_corallinus:8.84976,Artedius_lateralis:8.84976):10.3378):2.47439):1.42769):2.02232,Chitonotus_pugetensis:25.112):2.92379,(((Icelinus_fimbriatus:7.94826,(Icelinus_quadriseriatus:5.17142,((Icelinus_cavifrons:2.57204,Icelinus_tenuis:2.57204):0.069056,Icelinus_filamentosus:2.64109):2.53033):2.77684):0.122978,Icelinus_oculatus:8.07123):3.70526,(Icelinus_burchami:8.83447,Icelinus_borealis:8.83447):2.94203):16.2593):1.17158,((Triglops_scepticus:12.3792,(Triglops_pingelii:7.94275,Triglops_macellus:7.94275):4.43642):14.1047,((((Malacocottus_zonurus:0.913698,Malacocottus_kincaidi:0.913698):11.3334,Psychrolutes_phrictus:12.2471):6.14299,Dasycottus_setiger:18.3901):7.28413,(Cottiusculus_schmidti:16.6209,(Artediellus_fuscimentus:10.5999,Cottiusculus_gonez:10.5999):6.02093):9.05339):0.809633):2.72345):1.28693,((((((Myoxocephalus_thompsonii:0.665801,Triglopsis_quadricornis:0.665801):5.65441,(Myoxocephalus_aenaeus:5.30369,Myoxocephalus_octodecemspinosus:5.30369):1.01652):8.86911,(Myoxocephalus_scorpius:8.37588,((Microcottus_sellaris:4.1286,Myoxocephalus_polyacanthocephalus:4.1286):0.232136,Myoxocephalus_stelleri:4.36074):4.01514):6.81344):2.86588,(Enophrys_bison:13.0093,Taurulus_bubalis:13.0093):5.04592):5.50815,((Gymnocanthus_tricuspis:9.40795,Gymnocanthus_herzensteini:9.40795):12.6566,Icelus_cataphractus:22.0646):1.49879):1.90494,Radulinus_asprellus:25.4683):5.02598):4.26225):1.37392,(((Hemilepidotus_spinosus:8.79185,(Hemilepidotus_hemilepidotus:5.4815,(Hemilepidotus_gilberti:3.18934,(Hemilepidotus_jordani:1.16791,Hemilepidotus_zapus:1.16791):2.02143):2.29216):3.31034):20.3774,(((Hemitripterus_americanus:22.4085,(Blepsias_cirrhosus:21.7136,Hemitripterus_villosus:21.7136):0.694905):3.94965,(Nautichthys_oculofasciatus:14.7887,Nautichthys_pribilovius:14.7887):11.5695):0.208301,(((((Agonus_cataphractus:15.5813,(Sarritor_leptorhynchus:12.5225,((Aspidophoroides_monopterygius:8.5211,(Podothecus_sachi:5.44428,Podothecus_accipenserinus:5.44428):3.07681):2.17853,(Freemanichthys_thompsoni:10.5403,Sarritor_frenatus:10.5403):0.159353):1.82284):3.05882):0.763232,(Agonopsis_vulsa:11.2498,(((Bathyagonus_pentacanthus:3.23695,((Xeneretmus_leiops:0.074269,Bathyagonus_nigripinnis:0.074269):0.972824,Xeneretmus_latifrons:1.04709):2.18986):1.48603,Agonopsis_chiloensis:4.72299):2.65066,Odontopyxis_trispinosa:7.37365):3.87615):5.09472):2.53629,(Tilesina_gibbosa:14.1044,Stellerina_xyosterna:14.1044):4.77642):2.81146,Hypsagonus_quadricornis:21.6923):4.7151,Bathyagonus_alascanus:26.4074):0.159139):2.60279):5.98291,((Marukawichthys_ambulator:15.198,Rhamphocottus_richardsonii:15.198):18.2411,(Scorpaenichthys_marmoratus:21.8615,Leptocottus_armatus:21.8615):11.5776):1.71309):0.97824):1.00078):3.90711):2.65823):3.20871,(Zaniolepis_frenata:8.10296,Zaniolepis_latipinnis:8.10296):38.8023):2.29068):1.94759,Anoplopoma_fimbria:51.1435):3.85785,(Ostracoberyx_dorygenys:29.0573,(Arripis_georgianus:14.7694,(Arripis_trutta:3.77297,Arripis_truttacea:3.77297):10.9964):14.2879):25.9441):8.45976,(((Aulichthys_japonicus:37.4036,Aulorhynchus_flavidus:37.4036):2.61947,(((Apeltes_quadracus:21.6452,Spinachia_spinachia:21.6452):6.87059,(Culaea_inconstans:24.3007,(Pungitius_pungitius:11.3829,Pungitius_sinensis:11.3829):12.9178):4.21514):1.97726,(Gasterosteus_aculeatus:16.5848,Gasterosteus_wheatlandi:16.5848):13.9083):9.53005):3.15011,Hypoptychus_dybowskii:43.1732):20.2879):13.5194,(Normanichthys_crockeri:73.3191,(((Trigla_lyra:53.3639,(((Chelidonichthys_lucerna:6.26951,Chelidonichthys_spinosus:6.26951):10.2652,(Eutrigla_gurnardus:10.0241,((Chelidonichthys_lastoviza:6.54954,Chelidonichthys_obscurus:6.54954):2.71334,Chelidonichthys_cuculus:9.26288):0.76126):6.51054):29.0175,((((Lepidotrigla_cavillone:5.20487,(Lepidotrigla_grandis:5.0191,Lepidotrigla_argus:5.0191):0.185771):7.41117,Lepidotrigla_microptera:12.616):0.16216,Lepidotrigla_papilio:12.7782):0.281787,Lepidotrigla_spinosa:13.06):32.4922):7.81171):1.36825,(Prionotus_scitulus:20.0841,(Bellator_xenisma:13.2331,Prionotus_stephanophrys:13.2331):6.85096):34.6481):1.59683,(Peristedion_gracile:13.8947,Peristedion_miniatum:13.8947):42.4343):16.9901):3.66145):6.19685,((((Pontinus_furcirhinus:12.9078,(Pontinus_kuhlii:2.98674,Pontinus_longispinis:2.98674):9.92106):36.7577,((Sebastolobus_macrochir:14.0164,(Trachyscorpia_cristulata:13.9017,(Sebastolobus_alascanus:0.294448,Sebastolobus_altivelis:0.294448):13.6072):0.114721):14.5401,((Sebastiscus_marmoratus:8.83297,Sebastiscus_albofasciatus:8.83297):10.7248,((Hozukius_emblemarius:13.054,((Helicolenus_dactylopterus:1.7039,Helicolenus_hilgendorfii:1.7039):0.358022,(Helicolenus_lengerichi:1.28594,Helicolenus_avius:1.28594):0.775986):10.9921):2.58829,(Sebastes_matsubarai:9.6321,((Sebastes_proriger:8.27368,(Sebastes_zacentrus:4.30482,(Sebastes_variegatus:3.73287,(Sebastes_wilsoni:2.50339,Sebastes_emphaeus:2.50339):1.22948):0.571952):3.96886):1.25456,(((((((Sebastes_ciliatus:0.488347,Sebastes_variabilis:0.488347):0.528396,((Sebastes_crameri:0.297511,Sebastes_reedi:0.297511):0.543546,Sebastes_polyspinis:0.841058):0.175685):2.91388,Sebastes_baramenuke:3.93063):2.66476,(Sebastes_alutus:5.97968,((Sebastes_viviparus:2.65969,Sebastes_fasciatus:2.65969):0.575986,((Sebastes_mentella:1.45577,Sebastes_marinus:1.45577):0.650936,Sebastes_norvegicus:2.1067):1.12897):2.744):0.61571):1.43539,(((Sebastes_macdonaldi:5.18285,Sebastes_ruberrimus:5.18285):1.76243,(((((Sebastes_diploproa:1.00715,(Sebastes_sinensis:0.495766,(Sebastes_melanosema:0.335889,Sebastes_cortezi:0.335889):0.159877):0.511388):3.31834,(Sebastes_gilli:3.07596,(Sebastes_phillipsi:2.78857,Sebastes_aurora:2.78857):0.287388):1.24953):1.23893,Sebastes_melanostomus:5.56441):0.744906,(Sebastes_elongatus:5.2443,((Sebastes_maliger:2.73358,(((Sebastes_rastrelliger:1.33145,(Sebastes_dallii:1.15249,Sebastes_auriculatus:1.15249):0.178957):0.278356,Sebastes_nebulosus:1.6098):0.481143,(((Sebastes_atrovirens:0.780405,Sebastes_chrysomelas:0.780405):0.539839,Sebastes_carnatus:1.32024):0.65585,Sebastes_caurinus:1.97609):0.114853):0.64263):1.62113,(Sebastes_saxicola:3.23281,Sebastes_semicinctus:3.23281):1.12189):0.889597):1.06502):0.103447,((((Sebastes_mystinus:0.903345,Sebastes_entomelas:0.903345):2.83064,(Sebastes_flavidus:1.65911,(Sebastes_serranoides:0.629573,Sebastes_melanops:0.629573):1.02953):2.07488):0.99702,((Sebastes_pinniger:1.99567,Sebastes_miniatus:1.99567):2.64838,(Sebastes_jordani:3.82697,Sebastes_paucispinis:3.82697):0.817084):0.086954):0.731783,((((Sebastes_moseri:2.01648,Sebastes_rufinanus:2.01648):1.35775,(Sebastes_hopkinsi:0.709252,Sebastes_ovalis:0.709252):2.66498):0.963688,Sebastes_rufus:4.33792):0.890206,((Sebastes_goodei:3.3842,Sebastes_levis:3.3842):1.32418,((Sebastes_serriceps:3.45851,(Sebastes_babcocki:2.48097,(Sebastes_rubrivinctus:2.15002,Sebastes_nigrocinctus:2.15002):0.330954):0.977533):0.683503,(Sebastes_helvomaculatus:2.73362,((Sebastes_rosaceus:1.62326,(((Sebastes_umbrosus:0.456082,Sebastes_lentiginosus:0.456082):0.796145,(Sebastes_constellatus:1.04132,(Sebastes_oculatus:0.823266,Sebastes_capensis:0.823266):0.218058):0.210903):0.125605,(Sebastes_notius:1.24424,(Sebastes_exsul:0.527281,Sebastes_spinorbis:0.527281):0.71696):0.133591):0.245431):0.94838,((Sebastes_ensifer:1.62344,(Sebastes_chlorostictus:0.894049,(Sebastes_eos:0.468586,Sebastes_rosenblatti:0.468586):0.425463):0.729387):0.251289,Sebastes_simulator:1.87472):0.69692):0.161973):1.40839):0.566368):0.519746):0.234669):0.949975):0.532519):0.818676,(((Sebastes_joyneri:1.86581,(Sebastes_thompsoni:1.69858,Sebastes_inermis:1.69858):0.167239):3.89973,((Sebastes_trivittatus:2.93226,(Sebastes_zonatus:1.46339,(Sebastes_ijimae:0.685436,Sebastes_vulpes:0.685436):0.777956):1.46887):1.62668,(((Sebastes_nivosus:2.54615,Sebastes_oblongus:2.54615):0.79573,(Sebastes_koreanus:3.19061,((Sebastes_hubbsi:0.037765,Sebastes_longispinis:0.037765):2.49695,(Sebastes_pachycephalus_chalcogrammus:0.314964,Sebastes_pachycephalus_pachycephalus:0.314964):2.21976):0.655889):0.151267):0.764344,(Sebastes_schlegelii:2.6749,Sebastes_taczanowskii:2.6749):1.43132):0.452725):1.2066):1.41393,(Sebastes_scythropus:6.50983,Sebastes_kiyomatsui:6.50983):0.669635):0.584493):0.266816):0.693428,(Sebastes_glaucus:6.5247,((Sebastes_minor:5.81438,(Sebastes_steindachneri:4.63411,Sebastes_owstoni:4.63411):1.18027):0.509583,(Sebastes_aleutianus:3.27471,Sebastes_melanostictus:3.27471):3.04926):0.200733):2.19951):0.440237,((Sebastes_borealis:2.1731,(Sebastes_flammeus:1.1142,Sebastes_iracundus:1.1142):1.05889):4.46009,Sebastes_brevispinis:6.63319):2.53125):0.363799):0.10386):6.01018):3.91554):8.99868):21.108976):9.88518,((Scorpaenopsis_macrochir:45.5753,((((((Scorpaena_guttata:26.6869,(Scorpaena_plumieri:23.5969,Neomerinthe_hemingwayi:23.5969):3.08999):3.86303,(Scorpaena_maderensis:28.3351,(Scorpaena_brasiliensis:20.2873,Scorpaena_mystes:20.2873):8.04787):2.21482):2.11173,((Scorpaena_porcus:20.7339,Scorpaena_notata:20.7339):5.46955,(Scorpaena_scrofa:10.5373,Scorpaena_elongata:10.5373):15.6662):6.45821):5.39697,(Scorpaena_onaria:21.9644,Scorpaenodes_scaber:21.9644):16.0942):0.819421,Scorpaenopsis_diabolus:38.8781):4.43054,((Iracundus_signifer:34.1561,Taenianotus_triacanthus:34.1561):3.89981,Caracanthus_maculatus:38.0559):5.25269):2.2667):11.3718,(Scorpaenodes_xyris:51.2208,(Dendrochirus_biocellatus:33.5,((Dendrochirus_brachypterus:17.1097,(Pterois_miles:6.15943,Pterois_volitans:6.15943):10.9502):3.12196,((Pterois_radiata:11.0392,(Pterois_antennata:2.53097,Pterois_mombasae:2.53097):8.50825):1.63525,Dendrochirus_zebra:12.6745):7.55714):13.2684):17.7208):5.72626):2.60357):8.73376,((Plectrogenium_nanum:42.2846,((Maxillicosta_whitleyi:18.4848,Neosebastes_pandus:18.4848):20.0661,(Acanthistius_ocellatus:31.0173,(Congiopodus_peruvianus:28.7568,Zanclorhynchus_spinifer:28.7568):2.26052):7.53362):3.7336):2.12498,Bembras_japonica:44.4095):23.8749):14.8929):6.36426):2.11914,(Hoplichthys_citrinus:83.2964,((Gnathanacanthus_goetzeei:51.9688,((Aploactisoma_milesii:41.6882,Aetapcus_maculatus:41.6882):3.15235,((Inimicus_japonicus:44.5768,Synanceia_verrucosa:44.5768):0.12176,Inimicus_sinensis:44.6986):0.14196):7.12833):5.14997,((Ablabys_taenianotus:56.9208,(Centropogon_australis:41.7318,Gymnapistes_marmoratus:41.7318):15.189):0.085031,Notesthes_robusta:57.0059):0.112948):26.1776):8.36434):1.54829):13.3243):8.62173,((((((((Paretroplus_polyactis:7.82044,((Paretroplus_dambabe:6.72031,(Paretroplus_maromandia:5.89463,Paretroplus_maculatus:5.89463):0.825678):0.120473,Paretroplus_menarambo:6.84078):0.979656):0.251289,Paretroplus_kieneri:8.07173):5.35667,(Paretroplus_damii:6.02858,(Paretroplus_nourissati:1.32705,Paretroplus_tsimoly:1.32705):4.70153):7.39982):14.2279,(Etroplus_maculatus:10.0213,(Etroplus_canarensis:5.23841,Etroplus_suratensis:5.23841):4.78291):17.6349):29.39678,((Oxylapia_polli:28.7198,(Ptychochromoides_vondrozo:6.32763,Ptychochromoides_betsileanus:6.32763):22.3922):4.0381,(Katria_katria:18.2006,(Ptychochromis_inornatus:9.56399,(Ptychochromis_grandidieri:4.75302,Ptychochromis_oligacanthus:4.75302):4.81097):8.63666):14.5572):24.2952):14.3336,(((((Astronotus_crassipinnis:0.919305,Astronotus_ocellatus:0.919305):43.401,((((((Mesonauta_egregius:9.06612,(Mesonauta_insignis:2.88788,Mesonauta_festivus:2.88788):6.17824):11.6585,((Uaru_amphiacanthoides:9.20877,Uaru_fernandezyepezi:9.20877):8.86542,((Heros_efasciatus:12.8387,Heros_severus:12.8387):3.57714,(Symphysodon_aequifasciatus:1.28514,Symphysodon_discus:1.28514):15.1307):1.65831):2.65044):2.66222,(((Australoheros_scitulus:2.03267,Australoheros_facetus:2.03267):4.17916,Australoheros_tembe:6.21183):13.37,((((Vieja_tuyrensis:9.79258,Tomocichla_sieboldii:9.79258):3.17427,(((Cryptoheros_sajica:10.6485,((Parachromis_dovii:6.44913,Parachromis_managuensis:6.44913):2.60957,(Parachromis_friedrichsthalii:5.15321,(Parachromis_loisellei:1.94738,Parachromis_motaguensis:1.94738):3.20583):3.90549):1.58984):0.88976,(((Cichlasoma_beani:5.92316,Cichlasoma_istlanum:5.92316):4.22799,((Archocentrus_centrarchus:6.47931,(((Amphilophus_xiloaensis:0.885126,Amphilophus_citrinellus:0.885126):0.666858,Amphilophus_hogaboomorum:1.55198):0.201034,Amphilophus_labiatus:1.75302):4.72629):1.97269,(Amphilophus_lyonsi:5.9251,Cichlasoma_trimaculatum:5.9251):2.52689):1.69916):0.919215,((Theraps_wesseli:9.51124,((Cryptoheros_myrnae:0.252598,Cryptoheros_septemfasciatus:0.252598):1.4744,Amatitlania_nigrofasciata:1.727):7.78424):1.24184,((Cryptoheros_cutteri:3.36909,(Cryptoheros_chetumalensis:0.666777,Cryptoheros_spilurus:0.666777):2.70231):6.57501,((Cryptoheros_nanoluteus:8.43755,Cryptoheros_panamensis:8.43755):1.40224,(Hypsophrys_nicaraguensis:6.53516,Hypsophrys_nematopus:6.53516):3.30463):0.104304):0.808986):0.317284):0.467938):0.523015,(Amphilophus_calobrensis:10.6593,(Cichlasoma_urophthalmus:6.40932,Petenia_splendida:6.40932):4.25002):1.40198):0.905532):4.6484,(((Nandopsis_tetracanthus:4.94049,Cichlasoma_ramsdeni:4.94049):7.93554,Nandopsis_haitiensis:12.876):4.06222,(Caquetaia_umbrifera:15.4657,(Heroina_isonycterina:14.2328,(Caquetaia_myersi:13.4639,(Caquetaia_kraussii:10.745,Caquetaia_spectabilis:10.745):2.71882):0.768942):1.23291):1.47253):0.676995):0.950188,(((((Amphilophus_robertsoni:7.89278,(Amphilophus_diquis:4.90428,(Amphilophus_rostratus:2.62871,Amphilophus_longimanus:2.62871):2.27557):2.98849):0.859047,Amphilophus_altifrons:8.75182):0.829707,((Amphilophus_alfari:4.04487,Amphilophus_bussingi:4.04487):4.52858,Amphilophus_rhytisma:8.57345):1.00808):6.36482,(Amphilophus_macracanthus:15.2124,(Archocentrus_spinosissimus:12.106,Rocio_octofasciata:12.106):3.10634):0.73398):1.81531,((Cichlasoma_atromaculatum:10.3539,Cichlasoma_festae:10.3539):5.35461,((Archocentrus_multispinosus:12.3399,(Tomocichla_tuba:8.46044,Tomocichla_asfraci:8.46044):3.87949):2.18106,(((((Herichthys_minckleyi:5.41421,(Herichthys_cyanoguttatus:2.96762,((Herichthys_carpintis:1.06631,Herichthys_tamasopoensis:1.06631):1.32799,Herichthys_deppii:2.3943):0.573317):2.44659):3.01458,((Herichthys_bartoni:0.450139,Herichthys_labridens:0.450139):4.76513,(Herichthys_pantostictus:2.786,Herichthys_steindachneri:2.786):2.42927):3.21352):1.37963,(((Cichlasoma_bocourti:1.38692,Cichlasoma_pearsei:1.38692):5.73708,(((Vieja_intermedia:4.1048,(Vieja_godmanni:1.90344,Vieja_microphthalma:1.90344):2.20136):1.9318,(Cichlasoma_ufermanni:5.7238,(Theraps_lentiginosus:5.56163,(Amphilophus_nourissati:4.42137,Theraps_irregularis:4.42137):1.14026):0.162174):0.312794):0.471575,Vieja_heterospila:6.50817):0.615821):2.23498,((Theraps_coeruleus:6.17685,(((Vieja_argentea:1.87096,Paraneetroplus_gibbiceps:1.87096):1.10865,(Vieja_regani:2.28608,Paraneetroplus_bulleri:2.28608):0.693526):3.07364,(Vieja_maculicauda:2.59867,(Vieja_melanura:0.380214,Vieja_synspila:0.380214):2.21846):3.45457):0.123598):0.899049,(Protomelas_fenestratus:5.32569,((Vieja_guttulata:3.58689,Vieja_zonata:3.58689):1.17211,((Vieja_hartwegi:0.849074,Vieja_breidohri:0.849074):0.24646,Vieja_bifasciata:1.09553):3.66348):0.56668):1.7502):2.28308):0.449436):2.05177,Cichlasoma_grammodes:11.8602):1.13524,(Cichlasoma_salvini:11.1548,(((Thorichthys_aureus:5.74252,(Thorichthys_meeki:3.22031,Thorichthys_socolofi:3.22031):2.52221):1.16842,((Thorichthys_callolepis:1.0147,Thorichthys_helleri:1.0147):3.11984,(Haplochromis_maculipinna:1.85524,Thorichthys_ellioti:1.85524):2.27931):2.77639):2.01632,(Thorichthys_affinis:2.68514,Thorichthys_pasionis:2.68514):6.24212):2.22756):1.84059):1.52558):1.18755):2.05311):0.803778):1.01636):3.80506):2.70293,((Hypselecara_coryphaenoides:14.2064,Hypselecara_temporalis:14.2064):8.12049,Hoplarchus_psittacus:22.3269):3.7629):3.93915,Pterophyllum_scalare:30.0289):6.90245,(((((Nannacara_anomala:3.12127,Nannacara_aureocephalus:3.12127):3.50432,Nannacara_taenia:6.62559):16.6468,Nannacara_adoketa:23.2724):5.90005,Cleithracara_maronii:29.1724):3.51515,((Aequidens_potaroensis:29.7834,(((Acaronia_nassa:9.62294,Acaronia_vultuosa:9.62294):15.8059,((Bujurquina_vittata:12.9356,((Bujurquina_peregrinabunda:4.83384,(Bujurquina_apoparuana:0.962685,Bujurquina_hophrys:0.962685):3.87115):5.45995,Bujurquina_syspilus:10.2938):2.6418):8.512,((Aequidens_biseriatus:11.6201,(Aequidens_sapayensis:9.73527,Aequidens_rivulatus:9.73526):1.88481):2.8707,((Aequidens_latifrons:3.03731,Aequidens_pulcher:3.03731):4.27327,Aequidens_coeruleopunctatus:7.31058):7.1802):6.9568):3.98124):2.27857,(Laetacara_curviceps:7.50453,(Laetacara_dorsigera:1.05924,Laetacara_thayeri:1.05924):6.44529):20.2029):2.07605):0.892102,(((((Aequidens_metae:1.06259,Aequidens_diadema:1.06259):11.443,Aequidens_tubicen:12.5056):1.70291,Aequidens_michaeli:14.2085):6.03392,(((((Cichlasoma_pusillum:3.16871,(Cichlasoma_portalegrense:1.37524,Cichlasoma_dimerus:1.37524):1.79347):5.92417,(Cichlasoma_boliviense:6.75338,((Cichlasoma_amazonarum:3.07043,Cichlasoma_bimaculatum:3.07043):0.266127,(Cichlasoma_taenia:1.26749,Cichlasoma_orinocense:1.26749):2.06907):3.41682):2.3395):0.76844,Cichlasoma_araguaiense:9.86132):3.02765,Aequidens_patricki:12.889):3.42963,Aequidens_tetramerus:16.3186):3.9238):1.11719,Aequidens_chimantanus:21.3596):9.31595):2.01205):4.24379):7.38896):4.84506,((((Apistogramma_hoignei:27.5086,((Apistogrammoides_pucallpaensis:24.4783,(Apistogramma_regani:15.9285,Apistogramma_caetei:15.9285):8.54978):2.98639,(Apistogramma_agassizii:18.4195,(Apistogramma_iniridae:13.5119,Apistogramma_bitaeniata:13.5119):4.90764):9.04515):0.043963):17.1885,((((Satanoperca_leucosticta:7.68726,(Satanoperca_pappaterra:4.35506,Satanoperca_mapiritensis:4.35506):3.3322):16.6698,(Satanoperca_daemon:11.4933,Satanoperca_jurupari:11.4933):12.8637):3.81671,Satanoperca_acuticeps:28.1738):15.1897,Taeniacara_candidi:43.3635):1.33368):2.44949,(((((Biotodoma_cupido:15.8799,Biotodoma_wavrini:15.8799):19.0797,((Geophagus_steindachneri:28.4326,((Geophagus_grammepareius:11.4993,Geophagus_taeniopareius:11.4993):5.06226,((Geophagus_argyrostictus:7.05924,Geophagus_harreri:7.05924):7.11079,(Geophagus_dicrozoster:8.5436,((Geophagus_megasema:0.126843,Geophagus_abalios:0.126843):5.70895,(Geophagus_proximus:2.81123,Geophagus_surinamensis:2.81123):3.02456):2.70781):5.62643):2.39151):11.8711):5.39583,(Mikrogeophagus_altispinosus:27.2205,Mikrogeophagus_ramirezi:27.2205):6.60796):1.13115):2.39411,(((Gymnogeophagus_gymnogenys:10.114,(Gymnogeophagus_balzanii:8.84767,Gymnogeophagus_labiatus:8.84767):1.26637):3.95253,(Gymnogeophagus_meridionalis:12.1847,(Gymnogeophagus_rhabdotus:8.9332,Gymnogeophagus_setequedas:8.9332):3.2515):1.88187):18.5011,Geophagus_brasiliensis:32.5677):4.78603):7.525181,(Guianacara_owroewefi:4.85337,Guianacara_stergiosi:4.85337):40.0256):1.48234,((((((Crenicichla_compressiceps:15.439,(Crenicichla_notophthalmus:1.01457,Crenicichla_wallacii:1.01457):14.4245):2.29113,Crenicichla_regani:17.7302):5.27449,((Crenicichla_lugubris:10.282,Crenicichla_lenticulata:10.282):8.32866,(((Crenicichla_alta:5.09989,Crenicichla_menezesi:5.09989):4.61253,(Crenicichla_sveni:7.70256,Crenicichla_lepidota:7.70256):2.00986):5.74633,Crenicichla_multispinosa:15.4587):3.15191):4.39401):3.12059,(Crenicichla_macrophthalma:23.7401,(((Crenicichla_empheres:2.09512,((Crenicichla_celidochilus:0.691148,(Crenicichla_minuano:0.560152,Crenicichla_tendybaguassu:0.560152):0.130996):0.11609,Crenicichla_missioneira:0.807239):1.28788):14.5019,((Crenicichla_vittata:7.26996,Crenicichla_iguassuensis:7.26996):1.64898,(Crenicichla_scottii:6.26294,Crenicichla_punctata:6.26294):2.656):7.67803):4.58989,(Crenicichla_semifasciata:14.0915,(Crenicichla_reticulata:10.9111,Crenicichla_geayi:10.9111):3.18043):7.09533):2.55321):2.38518):3.91498,(((Teleocichla_proselytus:3.0761,Teleocichla_cinderella:3.0761):11.7644,Teleocichla_centrarchus:14.8405):7.76086,Teleocichla_monogramma:22.6013):7.43891):11.9033,Acarichthys_heckelii:41.9435):4.41777):0.785397):1.25145,((Chaetobranchus_semifasciatus:26.9956,Chaetobranchopsis_orbicularis:26.9956):0.133047,Chaetobranchus_flavescens:27.1286):21.2695):0.767294):2.91774,((Cichla_jariina:8.44512,(Cichla_mirianae:6.66405,(Cichla_thyrorus:1.97984,(Cichla_vazzoleri:1.22049,Cichla_pinima:1.22049):0.759347):4.68421):1.78107):4.83047,((Cichla_orinocensis:2.98333,(Cichla_kelberi:2.46191,(Cichla_monoculus:2.29475,Cichla_ocellaris:2.29475):0.16716):0.521419):4.63784,Cichla_intermedia:7.62117):5.65442):38.80757):9.10489,(Heterochromis_multidens:54.3263,(((((((Tilapia_rendalli:15.0053,((((Tristramella_simonis_simonis:5.05404,Iranocichla_hormuzensis:5.05404):3.20659,Sarotherodon_caudomarginatus:8.26062):1.11609,((((Sarotherodon_galilaeus_multifasciatus:3.70805,Sarotherodon_galilaeus_galilaeus:3.70805):0.338431,((Stomatepia_mongo:1.43537,(Stomatepia_pindu:1.1601,Stomatepia_mariae:1.1601):0.275274):0.724329,(((Pungu_maclareni:1.33372,(Konia_dikume:0.819033,Konia_eisentrauti:0.819033):0.514692):0.55278,((Sarotherodon_linnellii:0.654599,Sarotherodon_caroli:0.654599):0.729915,(Sarotherodon_steinbachi:1.03784,Sarotherodon_lohbergeri:1.03784):0.346676):0.50199):0.134085,Myaka_myaka:2.02059):0.13911):1.88679):0.77224,(Oreochromis_aureus:3.85314,Oreochromis_mossambicus:3.85314):0.965586):0.954683,Sarotherodon_galilaeus_sanagaensis:5.77341):3.6033):1.27287,Sarotherodon_melanotheron_melanotheron:10.6496):4.35576):0.485348,((((Oreochromis_andersonii:6.12405,(Oreochromis_amphimelas:5.76185,(((Alcolapia_latilabris:0.249731,(Alcolapia_ndalalani:0.175357,Alcolapia_alcalica:0.175357):0.074374):3.42366,Oreochromis_tanganicae:3.67339):0.750283,Oreochromis_karongae:4.42367):1.33818):0.362197):1.50763,Oreochromis_niloticus:7.63168):1.17098,(Oreochromis_niloticus_baringoensis:7.80372,Oreochromis_esculentus:7.80372):0.998946):3.94778,Sarotherodon_mvogoi:12.7504):2.74025):5.04078,(((Tilapia_nyongana:3.18599,Tilapia_zillii:3.18599):5.55213,((((Tilapia_rheophila:1.33311,Tilapia_louka:1.33311):1.7296,Tilapia_dageti:3.0627):0.192985,Tilapia_guineensis:3.25569):3.86968,Tilapia_tholloni:7.12537):1.61275):9.65971,((Tilapia_joka:16.4306,((((((Hemibates_stenosoma:7.64492,Xenotilapia_ornatipinnis:7.64492):3.14899,(Bathybates_minor:8.48677,((((Bathybates_vittatus:4.59101,Bathybates_leo:4.59101):0.966326,Bathybates_ferox:5.55734):0.427086,(Bathybates_graueri:4.71192,Bathybates_fasciatus:4.71192):1.2725):1.5614,Bathybates_hornii:7.54582):0.940951):2.30713):1.19567,(Trematocara_macrostoma:4.58352,Trematocara_unimaculatum:4.58352):7.40606):2.71308,(((((((Neolamprologus_cylindricus:6.20964,(((Chalinochromis_popelini:3.44077,Chalinochromis_brichardi:3.44077):0.684518,Julidochromis_ornatus:4.12528):1.93764,Neolamprologus_leleupi:6.06292):0.14672):2.12265,((Neolamprologus_furcifer:7.09237,(((Lamprologus_mocquardi:2.58609,(Lamprologus_werneri:1.04782,Lamprologus_congoensis:1.04782):1.53827):3.68441,(Lepidiolamprologus_cunningtoni:3.06705,Neolamprologus_tetracanthus:3.06705):3.20345):0.673247,Neolamprologus_modestus:6.94374):0.14863):0.851573,(Neolamprologus_longior:7.19078,((Neolamprologus_mondabu:5.50898,(Telmatochromis_temporalis:4.19278,((Telmatochromis_bifrenatus:1.24927,Telmatochromis_dhonti:1.24927):2.71397,((Neolamprologus_pulcher:2.75674,(Telmatochromis_burgeoni:1.90009,Neolamprologus_christyi:1.90009):0.856659):0.982851,((Julidochromis_marlieri:3.07604,Julidochromis_regani:3.07604):0.370192,(Neolamprologus_helianthus:2.05814,(Neolamprologus_brichardi:1.53082,(Neolamprologus_splendens:1.32876,(Neolamprologus_gracilis:1.04186,Neolamprologus_marunguensis:1.04186):0.286905):0.202059):0.527317):1.38809):0.293365):0.22364):0.229543):1.3162):0.10589,Telmatochromis_vittatus:5.61487):1.5759):0.753171):0.388345):0.475796,Variabilichromis_moorii:8.80809):1.0568,(((((((Altolamprologus_calvus:5.831,Altolamprologus_compressiceps:5.831001):1.55209,(Lepidiolamprologus_profundicola:6.27703,(Lepidiolamprologus_elongatus:4.89041,((Lamprologus_callipterus:3.06804,Lamprologus_ocellatus:3.06804):1.26883,(Neolamprologus_meeli:2.13239,Lepidiolamprologus_attenuatus:2.13239):2.20448):0.553547):1.38662):1.10606):0.486684,(Lamprologus_lemairii:6.64589,Neolamprologus_leloupi:6.64589):1.22389):0.393419,(Neolamprologus_multifasciatus:3.38701,Neolamprologus_similis:3.38701):4.87619):0.452419,(Lamprologus_ornatipinnis:4.6788,Lamprologus_signatus:4.6788):4.03681):0.275134,Neolamprologus_brevis:8.99075):0.652661,(Neolamprologus_olivaceous:6.7642,(Neolamprologus_savoryi:5.19108,Lamprologus_tigripictilis:5.19108):1.57312):2.87921):0.221478):0.727084,Neolamprologus_tretocephalus:10.592):0.893369,Neolamprologus_toae:11.4853):1.92773,(((Grammatotria_lemairii:9.29874,((Xenotilapia_papilio:7.50274,(((Xenotilapia_spiloptera:3.40883,Xenotilapia_tenuidentata:3.40883):1.17268,Xenotilapia_bathyphila:4.58151):0.143108,Xenotilapia_ochrogenys:4.72461):2.77813):0.161388,((Xenotilapia_flavipinnis:3.98865,(Xenotilapia_sima:2.47221,Xenotilapia_melanogenys:2.47221):1.51644):3.30918,(Xenotilapia_leptura:5.86209,(Xenotilapia_rotundiventralis:4.77493,(Xenotilapia_longispinis:1.21551,(Xenotilapia_nigrolabiata:1.01416,Xenotilapia_caudafasciata:1.01416):0.20135):3.55942):1.08716):1.43574):0.366303):1.63461):0.417966,((Callochromis_macrops:3.71029,(Callochromis_melanostigma:2.18026,Callochromis_pleurospilus:2.18026):1.53003):5.02938,(((Ectodus_descampsii:4.01621,((Lestradea_perspicax:2.80613,Aulonocranus_dewindti:2.80613):0.101299,Cunningtonia_longiventralis:2.90743):1.10878):0.491853,Lestradea_stappersii:4.50806):2.03245,(((Ophthalmotilapia_boops:2.24819,(Ophthalmotilapia_heterodonta:1.35781,Ophthalmotilapia_nasuta:1.35781):0.890381):1.69466,(Cardiopharynx_schoutedeni:3.20894,Ophthalmotilapia_ventralis:3.20894):0.733913):0.156547,Cyathopharynx_furcifer:4.0994):2.44111):2.19916):0.977039):3.20375,(((((Paracyprichromis_nigripinnis:0.567289,Paracyprichromis_brieni:0.567289):5.64569,(Cyprichromis_zebra:4.05834,((Cyprichromis_microlepidotus:2.50414,(Cyprichromis_jumbo:1.72074,Cyprichromis_leptosoma:1.72074):0.783405):0.452539,(Cyprichromis_pavo:2.54418,Cyprichromis_zonatus:2.54418):0.412508):1.10165):2.15464):3.79818,((Benthochromis_tricoti:1.4113,Benthochromis_melanoides:1.4113):7.16861,((Haplotaxodon_trifasciatus:3.90704,((Plecodus_elaviae:1.75331,Plecodus_paradoxus:1.75331):1.71227,Haplotaxodon_microlepis:3.46558):0.441457):0.723805,((Perissodus_microlepis:2.27504,Plecodus_straeleni:2.27504):1.54456,(Xenochromis_hecqui:3.26072,(Perissodus_eccentricus:1.91391,Plecodus_multidentatus:1.91391):1.34681):0.558883):0.811236):3.94907):1.43125):0.952092,((((Limnochromis_auritus:4.1053,(Baileychromis_centropomoides:3.58076,(Gnathochromis_permaxillaris:2.81861,Limnochromis_staneri:2.81861):0.762151):0.524533):1.98873,Greenwoodochromis_christyi:6.09403):0.90715,Triglachromis_otostigma:7.00118):1.34623,(Greenwoodochromis_bellcrossi:3.25658,(Limnochromis_abeelei:1.66357,Cyphotilapia_frontosa:1.66357):1.59301):5.09083):2.61585):1.2704,(((((Orthochromis_polyacanthus:8.86458,(((((Sargochromis_carlottae:4.19217,((Sargochromis_coulteri:1.05557,(Serranochromis_altus:0.779602,Chetia_brevis:0.779602):0.275966):1.95862,(Pharyngochromis_acuticeps:2.23364,Serranochromis_angusticeps:2.23364):0.780548):1.17798):0.298711,((Chetia_flaviventris:3.98521,(((Serranochromis_thumbergi:1.43604,(Serranochromis_stappersi:1.34975,(Thoracochromis_albolabris:0.833654,Thoracochromis_buysi:0.833654):0.516093):0.086294):1.65971,Chetia_brevicauda:3.09575):0.172664,Sargochromis_mellandi:3.26841):0.716795):0.241371,Serranochromis_macrocephalus:4.22658):0.264305):0.636269,Sargochromis_giardi:5.12715):1.2951,(Ctenochromis_oligacanthus:0.671398,Ctenochromis_polli:0.671398):5.75085):1.8069,(Schwetzochromis_neodon:6.45128,(Thoracochromis_brauschi:0.426258,Cyclopharynx_fwae:0.426258):6.02502):1.77787):0.635441):0.852482,((Pseudocrenilabrus_multicolor_multicolor:1.12721,Pseudocrenilabrus_nicholsi:1.12721):2.71364,(Orthochromis_machadoi:2.21079,Pseudocrenilabrus_philander_philander:2.21079):1.63006):5.87621):0.070459,Astatoreochromis_alluaudi:9.78753):0.710856,((((Ctenochromis_pectoralis:5.72078,(Orthochromis_malagaraziensis:1.92903,Orthochromis_mazimeroensis:1.92903):3.79175):1.74298,(((((Haplochromis_ishmaeli:0.11394,Haplochromis_simpsoni:0.11394):0.119256,Haplochromis_degeni:0.233196):0.148785,(Haplochromis_piceatus:0.199035,Haplochromis_pyrrhocephalus:0.199035):0.182946):6.79498,Astatotilapia_burtoni:7.17697):0.215801,(Astatotilapia_bloyeti:6.52587,(Haplochromis_squamipinnis:3.87664,(((((Haplochromis_azureus:0.823219,Haplochromis_nyererei:0.823219):0.129207,Haplochromis_brownae:0.952427):1.60948,Haplochromis_velifer:2.56191):0.112293,Haplochromis_phytophagus:2.6742):0.121493,Haplochromis_rudolfianus:2.79569):1.08094):2.64924):0.866896):0.070991):1.31791,(Haplochromis_paludinosus:5.60829,((Dimidiochromis_strigatus:4.53874,(Maylandia_estherae:4.34959,(((((Diplotaxodon_macrops:0.990017,Pallidochromis_tokolosh:0.990017):2.05429,(Astatotilapia_calliptera:2.09229,Tropheops_tropheops:2.09229):0.952021):0.091813,((Rhamphochromis_longiceps:1.81966,Rhamphochromis_esox:1.81966):1.14891,(Diplotaxodon_greenwoodi:2.7443,Rhamphochromis_woodi:2.7443):0.224263):0.167554):0.813738,(Labeotropheus_trewavasae:1.8166,Maylandia_zebra:1.8166):2.13326):0.223227,Aristochromis_christyi:4.17309):0.176501):0.189152):0.17915,(Cyrtocara_moorii:3.39404,(Labidochromis_caeruleus:3.05475,((Nimbochromis_livingstonii:1.28613,Nimbochromis_venustus:1.28613):1.58937,(((Aulonocara_stuartgranti:0.612831,Placidochromis_polli:0.612831):0.266351,Otopharynx_brooksi:0.879182):1.20009,(Copadichromis_borleyi:0.232825,Nimbochromis_fuscotaeniatus:0.232825):1.84644):0.796224):0.179253):0.339295):1.32385):0.890402):3.17338):1.3562,((((((Simochromis_babaulti:3.1039,(Ctenochromis_horei:1.65824,Limnotilapia_dardennii:1.65824):1.44567):0.673061,(Pseudosimochromis_curvifrons:3.53104,Gnathochromis_pfefferi:3.53104):0.245921):1.55218,((Lobochilotes_labiatus:4.25058,Simochromis_diagramma:4.25058):0.970121,(Petrochromis_trewavasae_trewavasae:5.12539,(Petrochromis_polyodon:2.46722,Petrochromis_orthognathus:2.46722):2.65817):0.095312):0.108448):0.718978,Petrochromis_ephippium:6.04813):1.12918,Petrochromis_famula:7.1773):2.07197,(((Tropheus_moorii:2.50313,Tropheus_duboisi:2.50313):1.48288,(Tropheus_polli:2.03329,(Tropheus_annectens:0.707884,Tropheus_kasabae:0.707884):1.32541):1.95272):1.35978,(Melanochromis_auratus:3.67701,Tropheus_brichardi:3.67701):1.66878):3.90348):0.888597):0.360515):0.908113,((Tanganicodus_irsacae:2.09785,(Spathodus_marlieri:1.46949,Eretmodus_cyanostictus:1.46949):0.62836):4.94147,Spathodus_erythrodon:7.03932):4.36718):0.827154):0.686807):0.492616):1.28958):0.064899,Boulengerochromis_microlepis:14.7676):0.376198,Tilapia_mariae:15.1438):1.28686):0.102214,(((Gobiocichla_wonderi:12.6658,(Steatocranus_irvinei:10.8084,Tilapia_busumana:10.8084):1.85741):0.899487,Gobiocichla_ethelwynnae:13.5653):0.138768,Tilapia_brevimanus:13.704):2.82878):1.86501):2.13364):4.19242,(((Chilochromis_duponti:15.4895,(Tilapia_bilineata:13.2069,((Tilapia_sparrmanii:1.30101,Tilapia_guinasana:1.30101):8.10513,Tilapia_ruweti:9.40614):3.80077):2.28259):1.82815,(Steatocranus_casuarius:3.50346,(((Steatocranus_tinanti:2.05858,Steatocranus_bleheri:2.05858):0.177407,Steatocranus_ubanguiensis:2.23599):0.094043,(Steatocranus_gibbiceps:1.59435,Steatocranus_glaber:1.59435):0.735682):1.17344):13.8142):3.40616,(Oreochromis_malagarasi:13.7797,Tilapia_buttikoferi:13.7797):6.94413):4.00006):4.73958,Etia_nguti:29.4635):4.91629,(Hemichromis_bimaculatus:31.3812,((Hemichromis_guttatus:18.1736,(Hemichromis_fasciatus:10.4808,Hemichromis_elongatus:10.4808):7.69274):13.1167,(((Pelmatochromis_nigrofasciatus:15.2434,Pterochromis_congicus:15.2434):6.27901,Pelmatochromis_buettikoferi:21.5224):7.58709,((Serranochromis_robustus_robustus:26.6477,Teleogramma_depressa:26.6477):0.136825,(((Pelvicachromis_humilis:17.1443,Pelvicachromis_pulcher:17.1443):0.071783,Nanochromis_parilus:17.2161):1.37492,Tylochromis_pulcher:18.591):8.19347):2.32499):2.18074):0.090935):2.99857):9.67906,(Tylochromis_leonensis:5.26533,Tylochromis_polylepis:5.26533):38.7935):10.2675):6.8617):10.1986):37.7998,((((((((Marosatherina_ladigesi:73.0864,(((Labidesthes_sicculus:33.0551,((Atherinella_panamensis:22.3649,Membras_martinica:22.3649):6.11059,((Chirostoma_humboldtianum:18.5403,((Menidia_menidia:6.59594,Chirostoma_estor:6.59594):9.82717,Chirostoma_lucius:16.4231):2.11724):2.01555,Chirostoma_promelas:20.5559):7.91962):4.57961):31.8217,((Leuresthes_tenuis:14.3614,Atherinops_affinis:14.3614):18.3292,Odontesthes_regia:32.6907):32.1862):0.152145,(((((Hypoatherina_tsurugae:44.2184,(Atherinomorus_stipes:27.8274,Hypoatherina_harringtonensis:27.8274):16.3911):4.96138,((Teramulus_waterloti:29.3085,(Atherinomorus_vaigiensis:19.3347,Atherinomorus_lacunosus:19.3347):9.97376):8.04765,(Atherinomorus_endrachtensis:30.54,Hypoatherina_temminckii:30.54):6.81608):11.8237):8.71036,((Atherina_boyeri:25.8588,(Atherina_presbyter:10.852,Atherina_hepsetus:10.852):15.0067):30.1991,(Atherion_elymus:55.7108,((((Leptatherina_presbyteroides:16.0275,Leptatherina_wallacei:16.0275):7.68938,(Atherinosoma_elongata:2.89165,Atherinosoma_microstoma:2.89165):20.8252):3.1064,((Kestratherina_brevirostris:0.98452,Kestratherina_esox:0.98452):20.7274,Atherinason_hepsetoides:21.7119):5.11136):23.4467,((Craterocephalus_honoriae:29.1211,Craterocephalus_mugiloides:29.1211):9.15826,((((Craterocephalus_stercusmuscarum_fulvus:6.64055,Craterocephalus_stercusmuscarum_stercusmuscarum:6.64055):1.85399,(Craterocephalus_randi:6.26994,((Craterocephalus_lentiginosus:4.50075,(Craterocephalus_dalhousiensis:0.385473,Craterocephalus_gloveri:0.385473):4.11528):0.929523,Craterocephalus_nouhuysi:5.43028):0.839663):2.2246):18.54,(Craterocephalus_stramineus:22.3919,(Craterocephalus_capreoli:14.5196,Craterocephalus_pauciradiatus:14.5196):7.87235):4.64262):5.78203,((Craterocephalus_helenae:13.9344,Craterocephalus_marianae:13.9344):10.3074,((((Craterocephalus_eyresii:0.511789,Craterocephalus_centralis:0.511789):8.13236,(Craterocephalus_amniculus:5.27777,Craterocephalus_fluviatilis:5.27777):3.36638):5.22813,(Craterocephalus_marjoriae:11.371,Craterocephalus_cuneiceps:11.371):2.5013):4.87043,Craterocephalus_munroi:18.7427):5.4991):8.57476):5.46282):11.9906):5.44076):0.34707):1.83233):0.136412,(((Pseudomugil_gertrudae:41.6146,Pseudomugil_signifer:41.6146):2.06485,Pseudomugil_mellis:43.6795):1.68074,((((Rheocles_lateralis:3.93085,Rheocles_wrightae:3.93085):1.03673,Rheocles_alaotrensis:4.96758):25.7884,(((Bedotia_longianalis:6.39051,((Bedotia_tricolor:0.223596,Bedotia_geayi:0.223596):5.2395,Bedotia_madagascariensis:5.4631):0.927411):1.82733,(Bedotia_marojejy:4.1277,Bedotia_masoala:4.1277):4.09014):9.26155,(Rheocles_derhami:6.64947,Rheocles_vatosoa:6.64947):10.8299):13.2766):13.7799,(((((((Melanotaenia_affinis:3.75472,Glossolepis_ramuensis:3.75472):14.2769,((Melanotaenia_catherinae:10.2564,(Melanotaenia_batanta:1.7354,Melanotaenia_fredericki:1.7354):8.521):6.09346,(((Melanotaenia_lacustris:1.63275,Melanotaenia_monticola:1.63275):6.42588,(Melanotaenia_herbertaxelrodi:4.73309,(((Melanotaenia_goldiei:2.49967,Melanotaenia_mubiensis:2.49967):0.581009,Melanotaenia_trifasciata:3.08068):1.04957,(Melanotaenia_lakamora:1.17097,Melanotaenia_kamaka:1.17097):2.95928):0.602834):3.32554):4.9181,((Melanotaenia_duboulayi:5.34061,(Melanotaenia_fluviatilis:4.01654,Melanotaenia_eachamensis:4.01654):1.32407):5.32265,((Melanotaenia_ogilbyi:8.75069,(Melanotaenia_pygmaea:4.69392,((Melanotaenia_australis:1.06114,Melanotaenia_nigrans:1.06114):2.92775,(Melanotaenia_exquisita:3.18278,Melanotaenia_gracilis:3.18278):0.806104):0.705035):4.05677):0.624558,(((Melanotaenia_caerulea:4.86805,(((Melanotaenia_splendida_rubrostriata:1.52633,(Melanotaenia_splendida_inornata:1.17273,Melanotaenia_splendida_tatei:1.17273):0.353597):1.67032,Melanotaenia_parkinsoni:3.19665):1.06763,Melanotaenia_sexlineata:4.26428):0.60377):0.948168,Melanotaenia_sylvatica:5.81622):1.64518,Melanotaenia_maccullochi:7.4614):1.91386):1.288):2.31347):3.37313):1.68178):0.072115,(Melanotaenia_japenensis:9.10144,((Melanotaenia_praecox:7.1356,(Glossolepis_incisus:6.0871,Glossolepis_multisquamata:6.0871):1.0485):1.84268,Chilatherina_bleheri:8.97828):0.123158):9.00232):8.55931,Rhadinocentrus_ornatus:26.6631):4.77301,Cairnsichthys_rhombosomoides:31.4361):8.47732,Iriatherina_werneri:39.9134):4.52311,Melanotaenia_splendida_splendida:44.4365):0.099384):0.824346):12.6664):0.11284,Iso_natalensis:58.1394):6.88955):8.05734):20.6729,Neostethus_bicornis:93.7592):0.728855,(((((((Strongylura_strongylura:29.1315,(Strongylura_anastomella:15.3744,Strongylura_leiura:15.3744):13.7571):8.05668,((Strongylura_krefftii:26.4192,(((Tylosurus_acus_melanotus:1.71372,Tylosurus_pacificus:1.71372):4.07355,(Tylosurus_acus_imperialis:3.29387,Tylosurus_acus_rafale:3.29387):2.4934):11.9767,(Ablennes_hians:17.6079,(Tylosurus_crocodilus:13.5355,(Tylosurus_punctulatus:4.29893,Tylosurus_gavialoides:4.29893):9.2366):4.07238):0.156072):8.65526):5.83291,Strongylura_incisa:32.2521):4.93603):2.45842,Xenentodon_cancila:39.6466):10.2048,((((((Strongylura_hubbsi:24.0152,Tylosurus_acus_acus:24.0152):8.23885,(Strongylura_scapularis:32.1386,(Strongylura_marina:7.42447,Strongylura_fluviatilis:7.42447):24.7142):0.115397):4.0595,(((Potamorrhaphis_eigenmanni:2.91872,Potamorrhaphis_guianensis:2.91872):5.24946,Potamorrhaphis_petersi:8.16818):20.869,(Belonion_dibranchodon:9.92746,Belonion_apodion:9.92746):19.1097):7.27636):4.4781,(Pseudotylosurus_angusticeps:22.4965,Pseudotylosurus_microps:22.4965):18.2951):1.07682,(Strongylura_timucu:8.45514,Strongylura_senegalensis:8.45514):33.4133):4.81238,(Platybelone_argalus:45.1614,((Strongylura_notata_forsythia:1.52116,Strongylura_notata_notata:1.52116):36.886,((Cololabis_adocetus:5.03229,Cololabis_saira:5.03229):25.813,((Belone_svetovidovi:4.58981,Belone_belone:4.58981):3.91956,Petalichthys_capensis:8.50937):22.3359):7.56191):6.75419):1.51942):3.1706):6.55057,((Dermogenys_collettei:7.40139,Dermogenys_pusilla:7.40139):35.9888,((Nomorhamphus_ravnaki:16.6437,Nomorhamphus_weberi:16.6437):21.6688,Hemirhamphodon_pogonognathus:38.3125):5.07774):13.0118):18.232,(((((Parexocoetus_hillianus:8.19509,Parexocoetus_brachypterus:8.19509):19.3246,Parexocoetus_mento:27.5196):12.0914,(((Exocoetus_volitans:10.332,(Exocoetus_peruvianus:5.139,(Exocoetus_obtusirostris:3.38413,Exocoetus_monocirrhus:3.38413):1.75487):5.19296):12.1987,(((Cheilopogon_agoo:12.0483,((Cheilopogon_pinnatibarbatus_pinnatibarbatus:10.7606,Hirundichthys_marginatus:10.7606):1.10206,(Hirundichthys_albimaculatus:6.30149,(Hirundichthys_speculiger:4.0059,Hirundichthys_affinis:4.0059):2.29559):5.56114):0.18566):3.22263,Hirundichthys_rondeletii:15.2709):2.85856,((((Cheilopogon_exsiliens:2.35279,(Cheilopogon_xenopterus:1.89578,(Cheilopogon_abei:1.08735,Cheilopogon_dorsomacula:1.08735):0.808425):0.457012):3.83836,((Cheilopogon_cyanopterus:0.745963,Cheilopogon_spilonotopterus:0.745963):3.54258,Cheilopogon_atrisignis:4.28854):1.90261):8.09028,(((Prognichthys_sealei:4.56584,Prognichthys_tringa:4.56584):3.98089,(Prognichthys_occidentalis:1.80433,(Prognichthys_gibbifrons:0.550118,Prognichthys_glaphyrae:0.550118):1.25421):6.7424):3.42576,((Cypselurus_callopterus:3.57813,Cypselurus_poecilopterus:3.57813):7.01585,(Cypselurus_angusticeps:0.827595,Cypselurus_hexazona:0.827595):9.76638):1.37851):2.30894):0.979823,((Cheilopogon_pinnatibarbatus_californicus:4.35649,((Cheilopogon_melanurus:0.331026,Cheilopogon_furcatus:0.331026):3.90147,Cheilopogon_doederleinii:4.2325):0.123992):1.15072,(Cheilopogon_unicolor:0.805999,Cheilopogon_antoncichi:0.805999):4.70121):9.75404):2.86823):4.40121):12.5424,(Fodiator_rostratus:1.30296,Fodiator_acutus:1.30296):33.7701):4.538):9.97369,(Euleptorhamphus_viridis:37.8596,(Hemiramphus_far:15.2067,((Oxyporhamphus_micropterus_similis:5.8598,Oxyporhamphus_micropterus_micropterus:5.8598):8.81858,(Hemiramphus_brasiliensis:11.2848,Hemiramphus_balao:11.2848):3.39361):0.528309):22.6529):11.7252):21.7856,((Chriodorus_atherinoides:38.9773,Hyporhamphus_unifasciatus:38.9773):8.06861,((Hyporhamphus_quoyi:5.94859,Hyporhamphus_melanochir:5.94859):38.2929,((Hyporhamphus_sajori:24.8949,Hyporhamphus_regularis_regularis:24.8949):6.4191,Arrhamphus_sclerolepis_sclerolepis:31.314):12.9275):2.80442):24.3245):3.26357):17.7738,((Oryzias_mekongensis:49.4223,(Oryzias_latipes:28.6852,(Oryzias_curvinotus:11.2978,Oryzias_luzonensis:11.2978):17.3874):20.7372):9.41139,(((Oryzias_minutillus:31.2094,Oryzias_dancena:31.2094):7.55354,(Oryzias_hubbsi:16.8908,Oryzias_javanicus:16.8908):21.8721):10.9871,(Xenopoecilus_oophorus:30.3311,((Oryzias_celebensis:9.69614,(((Oryzias_profundicola:3.43733,Oryzias_marmoratus:3.43733):0.1408,Oryzias_matanensis:3.57813):2.49027,Oryzias_nigrimas:6.0684):3.62774):7.70486,Xenopoecilus_sarasinorum:17.401):12.9301):19.4189):9.08371):33.574):2.08027):5.55257,(((((Fundulus_majalis:4.96216,Fundulus_similis:4.96216):28.3204,(((Lucania_goodei:2.11367,Lucania_parva:2.11367):23.5556,((Fundulus_kansae:2.06935,Fundulus_zebrinus:2.06935):21.5778,(((Fundulus_notatus:7.5912,(Fundulus_olivaceus:6.90536,Fundulus_euryzonus:6.90536):0.685841):12.5098,(Fundulus_sciadicus:19.5916,(((Fundulus_lineolatus:9.73643,(Fundulus_escambiae:4.55587,Fundulus_nottii:4.55587):5.18056):1.01025,(Fundulus_dispar:1.26346,Fundulus_blairae:1.26346):9.48322):7.59508,(Fundulus_cingulatus:8.90065,Fundulus_rubrifrons:8.90065):9.44112):1.24988):0.509363):1.84572,((Fundulus_lima:14.0237,Fundulus_chrysotus:14.0237):6.91625,(Adinia_xenica:16.4096,Fundulus_luciae:16.4096):4.53029):1.00681):1.70045):2.02212):3.18583,((Fundulus_julisia:19.9633,Fundulus_seminolis:19.9633):4.50371,((((Fundulus_jenkinsi:13.6408,((Fundulus_relictus:0.254665,Fundulus_bermudae:0.254665):6.69324,Fundulus_grandis:6.94791):6.69285):4.01434,(Fundulus_confluentus:3.9495,Fundulus_pulvereus:3.9495):13.7056):2.6237,(Fundulus_diaphanus_diaphanus:2.84237,Fundulus_rathbuni:2.84237):17.4364):1.7134,(Fundulus_catenatus:7.03391,Fundulus_stellifer:7.03391):14.9583):2.47482):4.38809):4.42747):27.7118,(((Profundulus_guatemalensis:7.89558,Profundulus_punctatus:7.89558):33.6227,Profundulus_labialis:41.5182):3.22244,(Crenichthys_baileyi_baileyi:24.9392,(((Allodontichthys_polylepis:4.70177,((Allodontichthys_hubbsi:2.20552,Allodontichthys_tamazulae:2.20552):1.80088,Allodontichthys_zonistius:4.0064):0.695368):9.28951,((Ilyodon_whitei:0.601861,(Ilyodon_xantusi:0.14923,Ilyodon_furcidens:0.14923):0.45263):11.4926,Xenotaenia_resolanae:12.0945):1.89682):5.40379,(((Ataeniobius_toweri:15.417,(((((Allotoca_dugesii:4.76494,Allotoca_goslinei:4.76494):1.19634,(Allotoca_zacapuensis:3.84363,((Allotoca_meeki:0.767197,Allotoca_diazi:0.767197):1.03271,Allotoca_catarinae:1.79991):2.04372):2.11765):6.34378,Allotoca_regalis:12.3051):1.43355,((Skiffia_lermae:5.09544,(Skiffia_francesae:0.408669,Skiffia_multipunctata:0.408669):4.68677):7.26473,(Skiffia_bilineata:11.6023,(Girardinichthys_multiradiatus:8.4112,Girardinichthys_viviparus:8.4112):3.19107):0.757889):1.37844):0.284614,Hubbsina_turneri:14.0232):1.39375):0.755513,((Goodea_atripinnis:1.36165,Goodea_gracilis:1.36165):13.6619,((Xenotoca_eiseni:6.90218,Xenotoca_melanosoma:6.90218):5.12642,((((Alloophorus_robustus:5.9933,Xenotoca_variata:5.9933):0.593547,(Ameca_splendens:5.5738,Chapalichthys_encaustus:5.5738):1.01305):2.8631,(Zoogoneticus_quitzeoensis:7.77051,Zoogoneticus_tequila:7.77051):1.67945):0.998292,Xenoophorus_captivus:10.4482):1.58036):2.99497):1.14891):2.60804,(Characodon_audax:1.98835,Characodon_lateralis:1.98835):16.7922):0.614547):5.54415):19.8015):16.2537):5.67707,((((Anableps_anableps:39.1303,(Jenynsia_lineata:0.135884,Jenynsia_maculata:0.135884):38.9944):8.99843,Oxyzygonectes_dovii:48.1287):8.60808,(Fluviphylax_pygmaeus:54.7744,((Brachyrhaphis_punctifer:35.3965,Xenodexia_ctenolepis:35.3965):10.5694,((((((((Poecilia_wingei:3.87235,(Poecilia_obscura:0.533612,Poecilia_reticulata:0.533612):3.33874):13.9761,(((Micropoecilia_bifurca:6.06392,Micropoecilia_branneri:6.06392):4.73477,Micropoecilia_parae:10.7987):2.75509,Micropoecilia_picta:13.5538):4.29467):5.14456,(((Poecilia_latipinna:9.85125,Poecilia_latipunctata:9.85125):3.47384,(Poecilia_caucana:11.9819,(Poecilia_butleri:5.5975,Poecilia_mexicana:5.5975):6.38438):1.34321):6.981,((Pamphorichthys_araguaiensis:6.29839,(Pamphorichthys_hollandi:1.7784,Pamphorichthys_minor:1.7784):4.51999):12.6975,(Limia_melanogaster:13.0118,(Limia_vittata:7.98612,(Limia_dominicensis:6.44712,Limia_tridens:6.44712):1.539):5.02571):5.98408):1.31019):2.68693):6.73953,(Cnesterodon_decemmaculatus:10.9671,Cnesterodon_hypselurus:10.9671):18.7655):4.2136,((((Pseudopoecilia_festae:26.65,(Priapichthys_panamensis:25.6656,(Heterandria_formosa:24.3073,(Alfaro_cultratus:22.4312,(((((Brachyrhaphis_episcopi:13.107,Brachyrhaphis_holdridgei:13.107):2.10444,((Brachyrhaphis_rhabdophora:8.86221,Brachyrhaphis_terrabensis:8.86221):1.76896,Brachyrhaphis_roseni:10.6312):4.58028):1.33198,Brachyrhaphis_hartwegi:16.5434):1.54102,Phallichthys_amates:18.0844):1.93791,((Phallichthys_quadripunctatus:13.7802,Phallichthys_tico:13.7802):4.40623,(Xenophallus_umbratilis:16.6694,((Brachyrhaphis_parismina:0.476837,Brachyrhaphis_cascajalensis:0.476837):13.6413,(Priapichthys_puetzi:8.40234,Priapichthys_annectens:8.40234):5.71578):2.55125):1.51707):1.83591):2.40882):1.87613):1.35834):0.984396):2.76212,(((Poeciliopsis_monacha:14.7986,Poeciliopsis_viriosa:14.7986):4.91247,((((Poeciliopsis_scarlli:5.03495,Poeciliopsis_turrubarensis:5.03495):9.33789,((Poeciliopsis_presidionis:6.56469,Poeciliopsis_turneri:6.56469):5.67754,((Poeciliopsis_catemaco:2.38695,Poeciliopsis_gracilis:2.38695):0.41652,Poeciliopsis_hnilickai:2.80347):9.43876):2.1306):2.66932,(Poeciliopsis_baenschi:7.82947,(Poeciliopsis_latidens:4.83378,Poeciliopsis_fasciata:4.83378):2.99569):9.21269):1.75432,((Poeciliopsis_prolifica:4.56967,(Poeciliopsis_occidentalis:2.93342,Poeciliopsis_lucida:2.93342):1.63626):2.70645,Poeciliopsis_infans:7.27612):11.5204):0.914569):7.86326,((Poeciliopsis_paucimaculata:16.9267,(Poeciliopsis_elongata:14.4517,Poeciliopsis_retropinna:14.4517):2.47499):9.17843,(Neoheterandria_elegans:13.6034,Neoheterandria_tridentiger:13.6034):12.5017):1.46918):1.83785):1.49905,((((((((((Gambusia_hispaniolae:10.1237,(Gambusia_rhizophorae:4.36393,Gambusia_punctata:4.36393):5.75981):2.04735,(Gambusia_melapleura:5.76128,Gambusia_wrayi:5.76128):6.40981):1.4104,(((Gambusia_geiseri:5.34595,Gambusia_heterochir:5.34595):4.26561,(Gambusia_holbrooki:4.77751,Gambusia_affinis:4.77751):4.83405):2.64234,(Gambusia_atrora:9.74206,((Gambusia_hurtadoi:6.50893,Gambusia_vittata:6.50893):2.44618,(Gambusia_panuco:5.0932,Gambusia_marshi:5.0932):3.86191):0.786949):2.51185):1.32758):0.10719,(Gambusia_yucatana:8.95021,((Gambusia_manni:2.12183,Gambusia_puncticulata:2.12183):5.85088,Gambusia_nicaraguensis:7.97271):0.9775):4.73847):1.83008,(Gambusia_eurystoma:2.26704,Gambusia_sexradiata:2.26704):13.2517):2.29681,(Gambusia_luma:16.2393,(Heterophallus_rachovii:7.71713,Heterophallus_milleri:7.71713):8.52218):1.57626):3.62853,Belonesox_belizanus:21.4441):5.06612,((Heterandria_bimaculata:2.58354,Heterandria_jonesii:2.58354):22.1783,(((Xiphophorus_birchmanni:6.871,((Xiphophorus_multilineatus:1.03557,Xiphophorus_nigrensis:1.03557):4.28837,Xiphophorus_pygmaeus:5.32394):1.54706):0.168474,(((Xiphophorus_continens:4.10249,Xiphophorus_nezahualcoyotl:4.10249):1.31426,Xiphophorus_montezumae:5.41676):0.57783,(Xiphophorus_cortezi:3.21401,Xiphophorus_malinche:3.21401):2.78058):1.04488):1.2785,(((Xiphophorus_mayae:3.03434,Xiphophorus_signum:3.03434):1.38264,(Xiphophorus_alvarezi:1.98656,Xiphophorus_hellerii:1.98656):2.43042):2.80996,((((Xiphophorus_maculatus:4.44547,(Xiphophorus_milleri:3.67166,((Xiphophorus_meyeri:1.22533,(Xiphophorus_gordoni:0.638404,Xiphophorus_couchianus:0.638404):0.586929):2.0565,(Xiphophorus_evelynae:3.05533,Xiphophorus_variatus:3.05533):0.2265):0.389828):0.773811):0.460427,Xiphophorus_andersi:4.9059):0.34539,Xiphophorus_xiphidium:5.25129):0.245855,Xiphophorus_clemenciae:5.49714):1.72979):1.09104):16.4438):1.74842):0.999239,(Carlhubbsia_kidderi:1.54607,Carlhubbsia_stuarti:1.54607):25.9634):1.18333,((Priapella_compressa:4.37219,(Priapella_chamulae:3.15208,(Priapella_intermedia:1.88155,Priapella_olmecae:1.88155):1.27053):1.22011):18.0511,Scolichthys_greenwayi:22.4233):6.26947):2.21842):1.53682,(Quintana_atrizona:23.9801,(Girardinus_denticulatus:15.61595,(((Girardinus_microdactylus:6.68128,Girardinus_metallicus:6.68128):2.95749,Girardinus_creolus:9.63877):1.78357,(Girardinus_falcatus:5.31111,Girardinus_uninotatus:5.31111):6.11124):4.19361):8.36416):8.4679):1.49812):1.66155,Phalloptychus_januarius:35.6077):0.300276,Phalloceros_caudimaculatus:35.908):4.09799,Tomeurus_gracilis:40.006):5.95991):8.80852):1.96239):5.33104,((Valencia_hispanica:23.2488,Valencia_letourneuxi:23.2488):33.7246,(((((Cualac_tessellatus:30.5311,((((Cyprinodon_maya:4.68603,(Cyprinodon_alvarezi:1.83563,Cyprinodon_veronicae:1.83563):2.85041):6.11152,(Cyprinodon_artifrons:9.53361,(((((Cyprinodon_meeki:6.52252,Cyprinodon_nazas:6.52252):0.685017,(Cyprinodon_atrorus:0.871782,Cyprinodon_bifasciatus:0.871782):6.33575):0.699528,((Cyprinodon_macrolepis:0.832739,Cyprinodon_eximius:0.832739):4.4412,Cyprinodon_pachycephalus:5.27394):2.63312):1.16291,((((Cyprinodon_fontinalis:3.23508,(Cyprinodon_nevadensis_nevadensis:2.85658,Cyprinodon_radiosus:2.85658):0.378497):0.410514,Cyprinodon_macularius:3.64559):0.569327,(Cyprinodon_pisteri:1.43675,Cyprinodon_albivelis:1.43675):2.77817):1.01991,Cyprinodon_diabolis:5.23483):3.83514):0.37214,(((Cyprinodon_elegans:3.88206,(Cyprinodon_bovinus:1.52073,Cyprinodon_pecosensis:1.52073):2.36132):1.78821,Cyprinodon_rubrofluviatilis:5.67027):0.872439,((Cyprinodon_dearborni:2.59721,Cyprinodon_tularosa:2.59721):2.09202,(Cyprinodon_bondi:3.75218,Cyprinodon_variegatus_variegatus:3.75218):0.937055):1.85347):2.8994):0.091502):1.26394):5.94385,Megupsilon_aporus:16.7414):10.5928,Jordanella_floridae:27.3342):3.19695):4.88772,(Garmanella_pulchra:26.8136,Floridichthys_carpio:26.8136):8.6052):19.072,((Orestias_imarpe:13.0466,(Orestias_agassizii:5.37129,Orestias_gilsoni:5.37129):7.6753):7.78587,(Orestias_ispi:4.50233,(Orestias_luteus:0.614019,Orestias_silustani:0.614019):3.88831):16.3301):33.6584):0.102569,Cubanichthys_pengelleyi:54.5935):1.28971,((((Aphanius_dispar_richardsoni:6.99262,(Aphanius_dispar_dispar:2.07974,Aphanius_ginaonis:2.07974):4.91288):7.73558,Aphanius_sirhani:14.7282):11.2703,Aphanius_mento:25.9985):10.0174,(((Aphanius_saourensis:6.01573,Aphanius_iberus:6.01573):19.5159,(((Aphanius_asquamatus:18.6453,Aphanius_danfordii:18.6453):0.148806,Aphanius_anatoliae_anatoliae:18.7941):3.7412,(Aphanius_fasciatus:20.2278,(Aphanius_isfahanensis:7.24717,((Lebias_persicus:4.22856,Aphanius_sophiae:4.22856):0.13041,Aphanius_vladykovi:4.35897):2.8882):12.9807):2.30746):2.99639):1.11125,Aphanius_chantrei:26.6429):9.37305):19.8672):1.09025):5.09439):4.60363):26.8796,((((Pachypanchax_omalonotus:46.506,Pachypanchax_playfairii:46.506):23.5544,(Aplocheilus_panchax:45.6196,((Aplocheilus_blockii:11.7813,Aplocheilus_parvus:11.7813):21.2547,Aplocheilus_lineatus:33.036):12.5836):24.4407):13.4276,(((((Aphyosemion_guineense:54.0767,((((Scriptaphyosemion_brueningi:8.47918,Scriptaphyosemion_liberiense:8.47918):14.315,((Scriptaphyosemion_schmitti:16.0377,(Scriptaphyosemion_bertholdi:13.2065,Scriptaphyosemion_chaytori:13.2065):2.83121):2.50543,((Scriptaphyosemion_geryi:11.4481,Scriptaphyosemion_etzeli:11.4481):5.41929,Scriptaphyosemion_roloffi:16.8674):1.6758):4.25103):8.0025,(Scriptaphyosemion_banforense:24.717,Scriptaphyosemion_guignardi:24.717):6.07974):14.9558,((Callopanchax_monroviae:31.0529,((Callopanchax_sidibei:15.713,Callopanchax_toddi:15.713):9.28848,Callopanchax_occidentalis:25.0015):6.05136):5.85568,Epiplatys_singa:36.9086):8.8439):8.32421):2.88957,((Epiplatys_multifasciatus:27.6673,Epiplatys_sexfasciatus_sexfasciatus:27.6673):17.9883,(((Nimbapanchax_melanopterygius:5.01837,Epiplatys_maeseni:5.01837):13.2149,(Nimbapanchax_viridis:7.88054,Nimbapanchax_jeanpoli:7.88054):10.3527):9.71103,Nimbapanchax_petersi:27.9443):17.7112):11.3107):3.11322,Epiplatys_roloffi:60.0795):3.99365,Epiplatys_chaperi:64.0731):11.7804,((Foerschichthys_flavipinnis:57.1589,((((((Fundulopanchax_robertsoni:22.0651,(Fundulopanchax_filamentosus:18.4638,Fundulopanchax_walkeri:18.4638):3.60125):9.88613,((((Nothobranchius_thierryi:13.4823,Nothobranchius_kiyawensis:13.4823):2.41748,(Nothobranchius_kafuensis:10.9575,Nothobranchius_kirki:10.9575):4.94232):9.55859,(Fundulopanchax_oeseri:14.8997,Fundulopanchax_scheeli:14.8997):10.5587):4.20375,((Fundulopanchax_cinnamomeus:23.0021,(Fundulopanchax_sjostedti:19.9128,Fundulopanchax_mirabilis:19.9128):3.08933):3.79739,(Fundulopanchax_gardneri_gardneri:20.2817,Fundulopanchax_ndianus:20.2817):6.51776):2.86264):2.28908):1.38267,((Fundulopanchax_amieti:22.6236,Fundulopanchax_fallax:22.6236):7.9815,(Aphyosemion_deltaense:6.49075,Fundulopanchax_gularis:6.49075):24.1143):2.7288):9.57227,(Aphyosemion_franzwerneri:32.4236,(Aphyosemion_calliurum:14.2695,Aphyosemion_celiae:14.2695):18.1541):10.4826):1.26806,(((Aphyosemion_campomaanense:13.1429,Aphyosemion_heinemanni:13.1429):1.7948,(Aphyosemion_ahli:10.8533,Aphyosemion_edeanum:10.8533):4.08446):13.1794,Aphyosemion_australe:28.1172):16.057):8.00929,((Aphyosemion_herzogi:38.4112,((((Aphyosemion_striatum:13.0154,Aphyosemion_gabunense_gabunense:13.0154):13.8125,(Aphyosemion_louessense:13.9382,Aphyosemion_ogoense:13.9382):12.8897):2.54354,(Aphyosemion_primigenium:9.60936,Aphyosemion_exigoideum:9.60936):19.7621):3.78629,(Aphyosemion_alpha:23.4257,((Aphyosemion_lugens:3.79954,Aphyosemion_melinoeides:3.79954):14.3248,(((Aphyosemion_loennbergii:5.22451,(Aphyosemion_poliaki:3.84294,((((Aphyosemion_splendopleure:0.364349,Chromaphyosemion_koungueense:0.364349):0.108314,Aphyosemion_omega:0.472662):0.533082,Chromaphyosemion_punctulatum:1.00574):0.788056,Aphyosemion_volcanum:1.7938):2.04914):1.38157):4.6233,(Aphyosemion_kouamense:7.97077,(Aphyosemion_erythron:5.35842,((Aphyosemion_ecucuense:3.16645,Aphyosemion_malumbresi:3.16645):1.00667,Chromaphyosemion_melanogaster:4.17312):1.1853):2.61235):1.87705):1.82809,((Aphyosemion_bitaeniatum:7.76492,Aphyosemion_bivittatum:7.76492):3.09627,Aphyosemion_riggenbachi:10.8612):0.814714):6.44846):5.30137):9.732):5.25351):5.17408,((((Aphyosemion_elberti:0.082371,Aphyosemion_bualanum:0.082371):5.60855,Aphyosemion_exiguum:5.69092):11.4336,Aphyosemion_bamilekorum:17.1245):22.6678,(((Aphyosemion_congicum:13.7441,(Aphyosemion_cognatum:9.00042,Aphyosemion_decorsei:9.00042):4.74363):0.154207,((Aphyosemion_christyi:5.58808,Aphyosemion_elegans:5.58808):1.40116,(Aphyosemion_rectogoense:6.25236,Aphyosemion_lamberti:6.25236):0.736877):6.90902):14.901,((Aphyosemion_labarrei:26.5151,(Aphyosemion_punctatum:12.1248,Aphyosemion_wildekampi:12.1248):14.3903):2.14106,(((Aphyosemion_etsamense:9.13223,(Aphyosemion_mimbon:7.56197,Aphyosemion_cameronense:7.56197):1.57026):4.44895,Aphyosemion_maculatum:13.5812):11.3898,(Fundulopanchax_batesii:23.3075,(Aphyosemion_coeleste:19.2273,((Aphyosemion_citrineipinnis:8.02584,Aphyosemion_ocellatum:8.02584):2.31453,Aphyosemion_aureum:10.3404):8.88691):4.08025):1.66349):3.68518):0.143023):10.9932):3.79292):8.5982):4.97542):5.18158,Fenerbahce_formosus:62.3405):13.513):7.63448):5.58987,(((Kryptolebias_brasiliensis:72.223,((Rivulus_rectocaudatus:60.8586,(Rivulus_cylindraceus:58.6286,(((((((((Kryptolebias_marmoratus:35.67,Moema_piriana:35.67):0.452116,((Rivulus_immaculatus:28.2268,(Rivulus_amphoreus:20.0773,(Rivulus_deltaphilus:7.50591,Rivulus_stagnatus:7.50591):12.5714):8.14952):4.87601,((Rivulus_jucundus:18.2963,Rivulus_atratus:18.2963):7.49269,(Rivulus_ophiomimus:18.734,Rivulus_rubrolineatus:18.734):7.05504):7.3138):3.0193):0.237354,(Rivulus_uroflammeus:31.0017,(((Rivulus_magdalenae:21.2617,Rivulus_chucunaque:21.2617):4.49146,Rivulus_hildebrandi:25.7532):2.78078,((Rivulus_tenuis:19.389,Rivulus_birkhahni:19.389):4.81076,((Rivulus_isthmensis:6.77278,Rivulus_fuscolineatus:6.77278):11.829,Rivulus_weberi:18.6018):5.59796):4.3342):2.4677):5.35782):3.0414,(Rivulus_violaceus:14.6032,(Rivulus_punctatus:11.1727,Rivulus_apiamici:11.1727):3.43042):24.7977):1.25079,Rivulus_hartii:40.6517):2.26004,((((Aphyolebias_peruensis:8.57731,Moema_staecki:8.57731):14.4657,(Neofundulus_paraguayensis:22.1466,((Pterolebias_longipinnis:3.90107,Pterolebias_phasianus:3.90107):17.2026,(Trigonectes_balzanii:15.4358,Trigonectes_rubromarginatus:15.4358):5.66792):1.04289):0.896435):1.18494,(((Micromoema_xiphophora:14.0907,Terranatos_dolichopterus:14.0907):0.12107,((Rachovia_maculipinnis:12.7879,(Gnatholebias_zonatus:5.64414,Pterolebias_hoignei:5.64414):7.1438):0.117292,(Austrofundulus_transilis:9.85828,Llanolebias_stellifer:9.85828):3.04695):1.30652):3.83333,Renova_oscari:18.0451):6.18289):16.0471,((Rivulus_luelingi:16.0004,Rivulus_santensis:16.0004):4.73659,Rivulus_janeiroensis:20.737):19.5381):2.6366):2.04218,Pituna_compacta:44.9539):2.59034,Plesiolebias_aruana:47.5442):8.64198,Rivulus_roloffi:56.1862):2.4424):2.22996):3.53912,((Rivulus_agilae:23.9022,(Rivulus_strigatus:8.17978,Rivulus_geayi:8.17978):15.7224):24.8123,((Rivulus_mahdiaensis:35.4739,Rivulus_lyricauda:35.4739):5.45845,(Rivulus_frenatus:27.0073,Rivulus_xiphidius:27.0073):13.925):7.78218):15.6832):7.8253):4.72039,(Kryptolebias_caudomarginatus:8.97354,Kryptolebias_ocellatus:8.97354):67.9698):1.29904,(Nematolebias_whitei:68.6588,(Leptolebias_aureoguttatus:46.4285,Notholebias_minimus:46.4285):22.2303):9.5836):10.8354):4.4732):6.48957):3.70911,((((Gyrinomimus_grahami:16.0522,Gyrinomimus_bruuni:16.0522):15.85635,((Cetostoma_regani:7.37407,Ditropichthys_storeri:7.37407):24.3794,Gyrinomimus_myersi:31.7535):0.155131):0.134796,Ataxolepis_apus:32.0434):56.0012,(((Denariusa_bandata:46.826,((Ambassis_productus:37.1645,Ambassis_agrammus:37.1645):0.084823,(Parambassis_ranga:3.70309,Parambassis_wolffii:3.70309):33.5463):9.57668):0.090114,Ambassis_agassizii:46.9162):21.6461,Ambassis_marianus:68.5622):19.4824):15.7051):1.39118,(((Pseudochromis_flavivertex:48.8447,(Pseudochromis_bitaeniatus:48.0483,Cypho_purpurascens:48.0483):0.796451):52.4678,(Opistognathus_macrognathus:98.1622,((((Tripterygion_delaisi:40.2966,(Tripterygion_tripteronotum:34.4319,Tripterygion_melanurum:34.4319):5.86474):2.57792,Forsterygion_lapillum:42.8746):47.0807,(((((Lipophrys_pholis:18.7628,Paralipophrys_trigloides:18.7628):4.45473,Coryphoblennius_galerita:23.2176):46.928,Blennius_ocellaris:70.1455):3.99965,((Aidablennius_sphynx:64.7885,(Lipophrys_bauchotae:36.7481,(((Lipophrys_adriaticus:10.4075,Lipophrys_dalmatinus:10.4075):8.41237,(Lipophrys_caboverdensis:5.53851,Lipophrys_velifer:5.53851):13.2814):7.23023,(Lipophrys_canevae:8.70509,Lipophrys_nigriceps:8.70509):17.3451):10.698):28.0404):6.81557,((((((((Parablennius_rouxi:9.63962,(Parablennius_zvonimiri:7.41743,Parablennius_tentacularis:7.41743):2.22218):6.63149,(Parablennius_pilicornis:11.3068,(Parablennius_marmoreus:11.1331,Parablennius_salensis:11.1331):0.173724):4.96428):27.5012,(Parablennius_ruber:12.357,Parablennius_gattorugine:12.357):31.4153):6.1027,(Salaria_economidisi:9.14598,Salaria_fluviatilis:9.14598):40.729):2.63751,(Salaria_pavo:40.1036,(Scartella_caboverdiana:9.00578,Scartella_cristata:9.00578):31.0978):12.409):6.97791,(Parablennius_sanguinolentus:53.5245,(((Meiacanthus_anema:1.98594,Meiacanthus_smithi:1.98594):2.85273,Meiacanthus_grammistes:4.83867):45.8454,(Parablennius_incognitus:2.00758,Parablennius_parvicornis:2.00758):48.6765):2.84038):5.96599):4.47032,(Chasmodes_saburrae:51.1962,Hypsoblennius_hentz:51.1962):12.7646):4.42497,(Ophioblennius_atlanticus:40.2727,(Salarias_fasciatus:36.7009,Ophioblennius_steindachneri:36.7009):3.57179):28.113):3.21838):2.54108):8.71098,(Ecsenius_bicolor:36.6736,Ecsenius_midas:36.6736):46.1826):7.09906):6.44786,(((Aspasma_minima:74.6259,(Diplecogaster_bimaculata_bimaculata:66.6664,(((Apletodon_incognitus:6.57506,Apletodon_dentatus_dentatus:6.57506):53.4661,((Opeatogenys_gracilis:52.4047,(Gouania_willdenowi:52.3278,Lepadogaster_candolii:52.3278):0.076916):3.48629,(Discotrema_monogrammum:5.34397,Discotrema_crinophilum:5.34397):50.547):4.15014):1.90946,Lepadogaster_lepadogaster:61.9506):4.71578):7.95954):7.49512,((Gobiesox_rhessodon:19.6761,Gobiesox_maeandricus:19.6761):29.8994,Gobiesox_barbatulus:49.5755):32.5456):10.135,((Blennius_normani:66.2141,(Gillellus_semicinctus:66.0929,((Acanthemblemaria_exilispinus:14.7887,(((Acanthemblemaria_paula:2.93409,Acanthemblemaria_aspera:2.93409):6.13079,Acanthemblemaria_spinosa:9.06488):3.60999,Acanthemblemaria_betinensis:12.6749):2.11381):18.3548,Chaenopsis_alepidota_alepidota:33.1435):32.9494):0.121234):12.3146,((((Auchenionchus_microcirrhis:26.8455,Neoclinus_blanchardi:26.8455):49.3631,(Paraclinus_integripinnis:56.4171,(Malacoctenus_triangulatus:34.936,(Labrisomus_multiporosus:8.60543,Labrisomus_nuchipinnis:8.60543):26.3306):21.4811):19.7916):0.159906,Alloclinus_holderi:76.3686):0.152104,(Clinitrachus_argentatus:70.2842,(Gibbonsia_elegans:31.5985,Heterostichus_rostratus:31.5985):38.6857):6.23646):2.00812):13.7272):4.14709):1.75911):3.15036):0.511766,Gramma_loreto:101.824):3.31657):2.08903,((Agonostomus_telfairii:58.52,(((Aldrichetta_forsteri:20.0159,Liza_falcipinnis:20.0159):26.6213,((Mugil_soiuy:24.5609,(Liza_parsia:3.39102,Liza_tade:3.39102):21.1699):0.170531,((Liza_abu:18.2273,((((Liza_grandisquamis:10.0588,Oedalechilus_labeo:10.0588):2.03873,Liza_aurata:12.0976):0.093407,(Liza_dumerili:11.2487,Liza_ramada:11.2487):0.94228):2.18113,Liza_saliens:14.3721):3.85521):4.13905,(Liza_macrolepis:17.5983,Liza_affinis:17.5983):4.76808):2.36507):21.9057):8.85892,((Mugil_trichodon:26.3391,(Liza_argentea:20.3217,(Mugil_curema:7.54997,Mugil_gyrans:7.54997):12.7717):6.01738):8.9571,(((Mugil_liza:0.257887,Mugil_platanus:0.257887):33.4247,Mugil_incilis:33.6826):0.129816,(Mugil_capurrii:18.3882,Mugil_bananensis:18.3882):15.4242):1.48378):20.1999):3.02393):36.9866,((Assessor_flavissimus:84.4835,Calloplesiops_altivelis:84.4835):0.167059,((((Abudefduf_declivifrons:11.977,(Abudefduf_concolor:2.43269,Abudefduf_taurus:2.43269):9.54432):15.1736,((Abudefduf_septemfasciatus:9.07181,(Abudefduf_notatus:8.03491,Abudefduf_sordidus:8.03491):1.0369):12.7614,(Abudefduf_whitleyi:14.9235,(Abudefduf_bengalensis:11.5821,(Abudefduf_vaigiensis:10.7925,((Abudefduf_sparoides:8.21396,Abudefduf_margariteus:8.21396):1.98528,(Abudefduf_sexfasciatus:4.99484,(Abudefduf_lorenzi:4.07142,(((Abudefduf_hoefleri:0.877965,Abudefduf_troschelii:0.877965):1.80156,Abudefduf_saxatilis:2.67953):1.06027,Abudefduf_abdominalis:3.7398):0.331622):0.923418):5.2044):0.593253):0.789574):3.3414):6.90975):5.31743):23.689,((Lepidozygus_tapeinosoma:44.8837,(((Chromis_cyanea:25.1593,(Chromis_multilineata:14.089,(Chromis_atrilobata:10.196,Azurina_hirundo:10.196):3.89302):11.0702):6.67114,(((Chromis_atripectoralis:9.5131,Chromis_viridis:9.5131):9.56448,Chromis_ternatensis:19.0776):9.20978,(((Chromis_notata:9.66652,Chromis_flavomaculata:9.66652):13.0872,(Chromis_chrysura:17.3865,(Chromis_fumea:5.30363,Chromis_nitida:5.30363):12.0828):5.36729):2.29835,((Chromis_limbata:5.92595,(Chromis_alta:2.72024,Chromis_chromis:2.72024):3.2057):11.1096,(Chromis_punctipinnis:16.1813,(Chromis_alpha:15.705,((Chromis_xanthura:0.856835,Chromis_opercularis:0.856835):13.68,(Chromis_analis:11.802,((Chromis_xanthopterygia:7.20423,Chromis_weberi:7.20423):2.33307,(Chromis_caudalis:0.425964,Chromis_xanthochira:0.425964):9.11134):2.26474):2.73475):1.1682):0.476334):0.854264):8.01651):3.23528):3.54303):6.10756,((Chromis_atripes:10.957,(((Chromis_iomelas:7.60073,(Chromis_retrofasciata:7.14436,Chromis_agilis:7.14436):0.456373):0.956209,(Chromis_ovatiformis:3.31045,Chromis_amboinensis:3.31045):5.24649):0.748573,Chromis_margaritifer:9.30551):1.65146):17.8142,((Dascyllus_flavicaudus:12.784,(Dascyllus_marginatus:11.1547,(Dascyllus_carneus:5.27777,((Dascyllus_albisella:1.39461,Dascyllus_trimaculatus:1.39461):3.36905,Dascyllus_reticulatus:4.76367):0.514101):5.87689):1.62929):4.88236,(Dascyllus_aruanus:10.0449,Dascyllus_melanurus:10.0449):7.62143):11.1049):9.16678):6.9457):3.82013,((((Chrysiptera_unimaculata:17.2671,(Chrysiptera_glauca:17.1581,Chrysiptera_brownriggii:17.1581):0.109003):14.8941,(Chrysiptera_galba:29.6124,(Cheiloprion_labiatus:28.7566,(Pomachromis_richardsoni:26.1206,(((Chrysiptera_oxycephala:5.35913,Chrysiptera_springeri:5.35913):1.7165,Chrysiptera_hemicyanea:7.07563):12.597,(((Chrysiptera_taupou:5.95931,Chrysiptera_cyanea:5.95931):3.93824,Chrysiptera_rex:9.89755):8.52242,(Chrysiptera_rollandi:11.503,Chrysiptera_talboti:11.503):6.91693):1.25266):6.44795):2.63602):0.855853):2.5488):1.38006,((Dischistodus_melanotus:11.9774,((Dischistodus_perspicillatus:5.43664,Dischistodus_prosopotaenia:5.43664):5.19592,Dischistodus_chrysopoecilus:10.6326):1.34486):5.24069,Dischistodus_pseudochrysopoecilus:17.2181):16.3232):2.32634,(((((Chrysiptera_kuiteri:14.7344,Amblypomacentrus_clarus:14.7344):10.2998,Chrysiptera_annulata:25.0341):5.40391,(((((Pomacentrus_philippinus:13.6358,Pomacentrus_australis:13.6358):3.64654,((((Pomacentrus_moluccensis:0.471551,Pomacentrus_amboinensis:0.471551):9.3124,(Pomacentrus_albicaudatus:0.635927,Pomacentrus_adelus:0.635927):9.14803):3.92141,(Pomacentrus_trilineatus:10.5003,(Pomacentrus_burroughi:2.28949,Pomacentrus_grammorhynchus:2.28949):8.21077):3.20511):1.55419,(((Pomacentrus_smithi:8.33047,(Pomacentrus_stigma:6.90081,(Pomacentrus_brachialis:4.82993,(Pomacentrus_nigromanus:1.37086,Pomacentrus_alexanderae:1.37086):3.45907):2.07088):1.42966):1.08077,(Pomacentrus_nigromarginatus:5.60191,Pomacentrus_lepidogenys:5.60191):3.80933):2.71651,(((Pomacentrus_milleri:0.71479,Pomacentrus_nagasakiensis:0.71479):2.45257,Pomacentrus_chrysurus:3.16736):5.66479,Pomacentrus_reidi:8.83215):3.29561):3.1318):2.02279):1.47635,(Pomacentrus_bankanensis:13.2796,Pomacentrus_vaiuli:13.2796):5.47912):3.76174,((Pomacentrus_leptus:13.4408,(Pomacentrus_auriventris:4.11068,Pomacentrus_coelestis:4.11068):9.33015):4.11032,Pomacentrus_pavo:17.5512):4.96928):6.60648,((Pristotis_obtusirostris:6.38447,Teixeirichthys_jordani:6.38447):18.4667,(((Neopomacentrus_sindensis:10.9603,Neopomacentrus_miryae:10.9603):6.30202,(Pomacentrus_fuscidorsalis:12.9403,Neopomacentrus_nemurus:12.9403):4.32196):3.18977,((Neopomacentrus_taeniurus:9.82644,Neopomacentrus_filamentosus:9.82644):4.56219,(Neopomacentrus_azysron:0.114539,Neopomacentrus_cyanomos:0.114539):14.2741):6.06342):4.3991):4.27577):1.31112):1.1388,((Premnas_biaculeatus:19.8709,(Amphiprion_ocellaris:5.02352,Amphiprion_percula:5.02352):14.8474):3.21714,((((((Amphiprion_nigripes:3.6147,Amphiprion_chagosensis:3.6147):5.74119,((Amphiprion_akindynos:5.96615,(Amphiprion_latezonatus:5.86931,Amphiprion_mccullochi:5.86931):0.09684):2.92219,(Amphiprion_chrysopterus:0.931864,Amphiprion_leucokranos:0.931864):7.95648):0.467557):0.706639,((Amphiprion_allardi:9.02349,Amphiprion_chrysogaster:9.02349):0.861771,(Amphiprion_clarkii:8.15648,((Amphiprion_perideraion:3.53987,Amphiprion_sandaracinos:3.53987):2.5281,Amphiprion_akallopisos:6.06796):2.08852):1.72878):0.177271):0.332638,((Amphiprion_melanopus:1.03127,Amphiprion_rubrocinctus:1.03127):3.21888,Amphiprion_frenatus:4.25015):6.14502):1.19109,(Amphiprion_sebae:4.52042,Amphiprion_polymnus:4.52042):7.06584):0.395958,(Amphiprion_bicinctus:0.319292,Amphiprion_omanensis:0.319292):11.6629):11.1059):8.48875):1.8618,(Hemiglyphidodon_plagiometopon:25.4857,(((Amblyglyphidodon_curacao:7.14288,Amblyglyphidodon_leucogaster:7.14288):3.88249,Amblyglyphidodon_aureus:11.0254):14.1025,((Acanthochromis_polyacanthus:7.89532,(Altrichthys_azurelineatus:3.75668,Altrichthys_curatus:3.75668):4.13863):16.0053,(Neoglyphidodon_oxyodon:20.8668,(Neoglyphidodon_polyacanthus:17.242,(Neoglyphidodon_melas:13.5967,(Neoglyphidodon_thoracotaeniatus:5.9214,Neoglyphidodon_nigroris:5.9214):7.67526):3.64535):3.6248):3.03385):1.22723):0.357794):7.95294):2.42902):12.8361):2.13584):4.85214,((Mecaenichthys_immaculatus:22.7175,Parma_microlepis:22.7175):22.3907,(Parma_oligolepis:36.5834,(((Stegastes_imbricatus:15.2451,(Stegastes_planifrons:13.798,(Stegastes_partitus:11.4007,((Stegastes_leucostictus:0.924675,Stegastes_variabilis:0.924675):2.90933,(Stegastes_diencaeus:0.114801,Stegastes_adustus:0.114801):3.7192):7.56671):2.39726):1.44714):14.749,((Stegastes_nigricans:20.6256,Stegastes_lividus:20.6256):8.19571,Plectroglyphidodon_lacrymatus:28.8213):1.17281):3.86251,((Plectroglyphidodon_dickii:24.2094,(((Stegastes_apicalis:1.8927,Stegastes_obreptus:1.8927):16.105,(Stegastes_altus:5.28939,Stegastes_fasciolatus:5.28939):12.7083):3.53498,Plectroglyphidodon_leucozonus:21.5327):2.67675):6.33304,((Hypsypops_rubicundus:12.6425,(Abudefduf_luridus:8.63572,Similiparma_hermani:8.63572):4.00682):14.814,(Microspathodon_chrysurus:10.0578,Microspathodon_dorsalis:10.0578):17.3988):3.08586):3.31415):2.72676):8.52483):10.5836):28.9588):10.856):11.7233):1.46199,((((((Embiotoca_jacksoni:2.35932,Embiotoca_lateralis:2.35932):12.4904,((Rhacochilus_toxotes:11.3034,((Phanerodon_atripes:2.26581,Phanerodon_furcatus:2.26581):6.3965,Rhacochilus_vacca:8.66231):2.64109):1.40399,(Zalembius_rosaceus:10.7704,Brachyistius_frenatus:10.7704):1.93696):2.14238):2.75664,Hypsurus_caryi:17.6064):3.11532,(Neoditrema_ransonnetii:8.79389,(Ditrema_viride:1.82296,(Ditrema_temminckii_temminckii:0.683179,Ditrema_temminckii_pacificum:0.683179):1.13979):6.97093):11.9278):3.86845,(((Cymatogaster_aggregata:2.46277,Hyperprosopon_anale:2.46277):12.6509,Hysterocarpus_traskii_traskii:15.1137):5.33618,Micrometrus_minimus:20.4499):4.14029):11.3188,(Hyperprosopon_argenteum:14.9978,(Amphistichus_rhodoterus:8.28511,Amphistichus_argenteus:8.28511):6.71267):20.9112):72.7829):0.494456):4.79794,(((((Nematistius_pectoralis:70.2738,(Mene_maculata:58.2221,((Tetrapturus_angustirostris:23.1207,((((Makaira_indica:4.04914,((Makaira_mazara:0.840711,Makaira_nigricans:0.840711):1.86289,Istiophorus_platypterus:2.70361):1.34554):1.25389,(Tetrapturus_albidus:1.08422,Tetrapturus_audax:1.08422):4.21882):0.178919,Istiophorus_albicans:5.48195):2.9928,(Tetrapturus_belone:6.2129,(Tetrapturus_georgii:1.8648,Tetrapturus_pfluegeri:1.8648):4.3481):2.26185):14.646):19.7239,Xiphias_gladius:42.8446):15.3775):12.0516):8.41734,((((((((Remora_brachyptera:11.3716,Remora_osteochir:11.3716):2.27968,(Remora_australis:10.5106,Remora_remora:10.5106):3.14068):4.90205,Remorina_albescens:18.5533):1.77409,(Phtheirichthys_lineatus:8.32768,(Echeneis_neucratoides:4.13583,Echeneis_naucrates:4.13583):4.19185):11.9997):26.4228,Rachycentron_canadum:46.7502):10.0673,(Coryphaena_equiselis:8.46388,Coryphaena_hippurus:8.46388):48.3536):10.9583,((Seriolina_nigrofasciata:21.784,((((Seriola_rivoliana:0.525138,Seriola_carpenteri:0.525138):9.92233,Seriola_fasciata:10.4475):3.30002,(((Seriola_quinqueradiata:5.84717,Seriola_lalandi:5.84717):3.83993,Seriola_zonata:9.6871):2.87957,Seriola_dumerili:12.5667):1.18082):4.07105,Naucrates_ductor:17.8185):3.96542):37.4953,((((Parastromateus_niger:10.1761,Uraspis_helvola:10.1761):15.7468,(((Alectis_ciliaris:21.2461,(Alectis_indica:15.2751,Alectis_alexandrinus:15.2751):5.97094):1.51016,(Selene_orstedii:21.6565,((Selene_brownii:12.0488,((Selene_setapinnis:3.22555,Selene_peruviana:3.22555):7.62784,(Selene_brevoortii:5.78475,Selene_vomer:5.78475):5.06864):1.19541):7.72501,Carangoides_otrynter:19.7738):1.88271):1.09971):2.28841,((Carangoides_malabaricus:0.141863,Carangoides_chrysophrys:0.141863):20.001,Atropus_atropos:20.1429):4.90177):0.878292):5.14228,(((((Hemicaranx_leucurus:0.779298,Hemicaranx_zelotes:0.779298):19.3557,(Chloroscombrus_chrysurus:9.59504,Chloroscombrus_orqueta:9.59504):10.54):4.68499,((Alepes_djedaba:1.92616,Alepes_kleinii:1.92616):21.0156,(Atule_mate:16.4532,Selaroides_leptolepis:16.4532):6.48851):1.87826):2.47043,((Caranx_melampygus:7.82219,(Caranx_ignobilis:3.39463,(Caranx_hippos:2.32513,Caranx_sexfasciatus:2.32513):1.06949):4.42756):15.6318,(((Caranx_caninus:1.75124,Caranx_vinctus:1.75124):3.68517,Caranx_latus:5.4364):16.8807,((Carangoides_bartholomaei:11.4047,Carangoides_ruber:11.4047):7.75847,(Caranx_caballus:2.38723,Caranx_crysos:2.38723):16.776):3.15394):1.13684):3.83647):2.45135,(((Pseudocaranx_wrighti:4.98117,Carangoides_equula:4.98117):4.2927,Pseudocaranx_dentex:9.27387):16.402,(((Decapterus_punctatus:17.8041,(Caranx_rhonchus:15.819,(Decapterus_tabl:14.201,((Decapterus_kurroides:5.76471,Decapterus_akaadsi:5.76471):4.84038,(Decapterus_macrosoma:9.16437,((Decapterus_muroadsi:6.58544,Decapterus_macarellus:6.58544):1.9954,(Decapterus_maruadsi:4.63367,Decapterus_russelli:4.63367):3.94717):0.583531):1.44072):3.59596):1.618):1.98504):1.43437,(((Trachurus_murphyi:1.58758,Trachurus_symmetricus:1.58758):3.34992,(Trachurus_picturatus:0.746684,Trachurus_trachurus:0.746684):4.19082):3.18152,((Trachurus_mediterraneus:6.84823,(((Trachurus_japonicus:1.8104,Trachurus_novaezelandiae:1.8104):0.754461,Trachurus_declivis:2.56486):3.79963,(Trachurus_lathami:2.16398,Trachurus_trecae:2.16398):4.20051):0.48374):0.962729,Trachurus_capensis:7.81096):0.308059):11.1194):4.24884,(Selar_boops:15.3009,(Pseudocaranx_chilensis:8.36553,Selar_crumenophthalmus:8.36553):6.93542):8.18635):2.18859):4.06591):1.32342):1.15141,Gnathanodon_speciosus:32.2166):27.0626):8.49653):4.02656,(Lichia_amia:62.9655,(((Trachinotus_carolinus:14.5503,((Trachinotus_blochii:10.1846,Trachinotus_falcatus:10.1846):2.63388,(Trachinotus_goreensis:6.55747,(Trachinotus_goodei:2.74588,Trachinotus_rhodopus:2.74588):3.81159):6.26104):1.73175):5.15812,(Trachinotus_ovatus:15.0879,Trachinotus_teraia:15.0879):4.62049):36.1405,((Oligoplites_saurus:11.119,Oligoplites_altus:11.119):24.6129,(Scomberoides_lysan:3.13001,Scomberoides_commersonnianus:3.13001):32.6019):20.1169):7.1166):8.83688):6.88875):3.30652,(((((Centropomus_viridis:23.2464,(Centropomus_undecimalis:20.5533,Centropomus_poeyi:20.5533):2.69304):4.2229,Centropomus_nigrescens:27.4693):1.8375,(Centropomus_mexicanus:4.67956,Centropomus_parallelus:4.67956):24.6272):6.2013,(((Centropomus_robalito:9.89045,Centropomus_ensiferus:9.89045):8.39139,(Centropomus_armatus:8.58913,Centropomus_unionensis:8.58913):9.69271):11.5999,(Centropomus_medius:9.0971,Centropomus_pectinatus:9.0971):20.7846):5.62634):40.0385,(Leptobrama_muelleri:65.8199,((((Sphyraena_barracuda:13.6375,Sphyraena_guachancho:13.6375):27.5962,Sphyraena_forsteri:41.2337):19.6838,((Sphyraena_obtusata:35.7961,(Sphyraena_pinguis:21.7826,Sphyraena_iburiensis:21.7826):14.0135):21.0625,((Sphyraena_flavicauda:23.2485,Sphyraena_chrysotaenia:23.2485):25.8411,(((Sphyraena_sphyraena:20.3561,Sphyraena_idiastes:20.3561):1.02182,Sphyraena_viridensis:21.3779):7.14001,(Sphyraena_argentea:14.9799,Sphyraena_borealis:14.9799):13.5381):20.5716):7.76895):4.05892):1.5088,Sphyraena_putnamae:62.4262):3.39362):9.72672):6.45105):26.5346,(((Toxotes_chatareus:48.8022,Toxotes_lorentzi:48.8022):49.7411,((Eleutheronema_tetradactylum:47.9946,((Pentanemus_quinquarius:19.2014,Polydactylus_plebeius:19.2014):0.091268,Polydactylus_macrochir:19.2927):28.7019):27.2309,Polydactylus_approximans:75.2255):23.3178):8.63135,((Lates_calcarifer:54.3691,Lates_niloticus:54.3691):51.2189,((Psettodes_belcheri:39.8849,Psettodes_erumei:39.8849):64.261,((((Ancylopsetta_ommata:87.7914,(Cyclopsetta_chittendeni:71.5395,((Arnoglossus_thori:28.6848,(Arnoglossus_laterna:3.78102,Arnoglossus_imperialis:3.78102):24.9038):23.0411,((Bothus_lunatus:27.4108,((Bothus_podas:9.2032,Bothus_ocellatus:9.2032):16.1499,Bothus_robinsi:25.3531):2.05764):20.02385,((Laeops_kitaharae:35.2822,Lophonectes_gallus:35.2822):4.04337,Crossorhombus_kobensis:39.3256):8.10907):4.29128):19.8136):16.2518):2.00468,((((Xystreurys_rasile:35.8444,Xystreurys_liolepis:35.8444):42.5283,(((Citharichthys_macrops:23.7565,((Citharichthys_xanthostigma:0.110966,Citharichthys_sordidus:0.110966):17.9808,Etropus_microstomus:18.0918):5.66472):0.142159,(Citharichthys_stigmaeus:17.5399,(Etropus_crossotus:17.3953,Etropus_longimanus:17.3953):0.144583):6.35881):29.6803,Syacium_papillosum:53.5789):24.7938):3.37346,(Syacium_micrurum:81.6123,(Paralichthys_olivaceus:71.0006,((Paralichthys_lethostigma:18.4303,(Paralichthys_dentatus:12.8972,Paralichthys_squamilentus:12.8972):5.53306):44.4237,((Paralichthys_californicus:43.2589,((Pseudorhombus_cinnamoneus:31.4066,((Pseudorhombus_arsius:23.2865,(Tephrinectes_sinensis:6.5844,Pseudorhombus_pentophthalmus:6.5844):16.7021):0.79145,Tarphops_oligolepis:24.078):7.32866):5.91868,Hippoglossina_oblonga:37.3253):5.93361):6.83864,Paralichthys_patagonicus:50.0976):12.7565):8.14659):10.6117):0.13382):0.121232,((((Dexistes_rikuzenius:38.6807,((Hypsopsetta_guttulata:24.2517,(Pleuronichthys_cornutus:18.9175,((Pleuronichthys_ritteri:3.45542,Pleuronichthys_coenosus:3.45542):9.23481,(Pleuronichthys_verticalis:7.98576,Pleuronichthys_decurrens:7.98576):4.70448):6.22726):5.33425):11.2505,((((Microstomus_kitt:12.3216,((Embassichthys_bathybius:6.06583,Microstomus_achne:6.06583):4.45839,Microstomus_pacificus:10.5242):1.79733):1.94486,(Tanakius_kitaharae:9.58433,(Glyptocephalus_zachirus:6.8841,(Glyptocephalus_stelleri:1.86135,Glyptocephalus_cynoglossus:1.86135):5.02276):2.70023):4.68208):4.66265,((((((Hippoglossoides_dubius:2.23272,(Hippoglossoides_elassodon:1.07414,Hippoglossoides_robustus:1.07414):1.15858):1.56367,Hippoglossoides_platessoides:3.79639):4.65761,((Limanda_sakhalinensis:4.11478,Cleisthenes_herzensteini:4.11478):0.284738,(Limanda_aspera:2.79581,Limanda_limanda:2.79581):1.60371):4.05449):3.59858,(((Pleuronectes_platessa:7.34128,((Pseudopleuronectes_americanus:4.77004,(Platichthys_flesus:3.05742,Platichthys_stellatus:3.05742):1.71262):0.076307,Liopsetta_pinnifasciata:4.84635):2.49493):1.41629,(Limanda_proboscidea:7.58332,(Pleuronectes_quadrituberculatus:6.95612,((((Kareius_bicoloratus:2.22749,Psettichthys_melanostictus:2.22749):1.9901,Isopsetta_isolepis:4.2176):1.12456,Parophrys_vetulus:5.34216):1.44836,(Lepidopsetta_polyxystra:3.5259,Lepidopsetta_bilineata:3.5259):3.26462):0.165606):0.627194):1.17425):2.65367,(Limanda_ferruginea:9.4981,((Pseudopleuronectes_obscurus:0.500886,(Pseudopleuronectes_schrenki:0.29813,Pseudopleuronectes_yokohamae:0.29813):0.202756):3.80286,Pseudopleuronectes_herzensteini:4.30374):5.19436):1.91314):0.641345):4.98942,(Clidoderma_asperrimum:15.5422,((Eopsetta_grigorjewi:5.98535,Eopsetta_jordani:5.98535):7.8988,(Hippoglossus_hippoglossus:4.4057,Hippoglossus_stenolepis:4.4057):9.47845):1.65802):1.49984):1.58001,Lyopsetta_exilis:18.622):0.307041):3.04542,(Verasper_moseri:10.0137,Verasper_variegatus:10.0137):11.9608):13.5277):3.17846):15.497,(Atheresthes_evermanni:0.162896,Atheresthes_stomias:0.162896):54.0147):26.1211,Peltorhamphus_novaezeelandiae:80.2987):1.45637,(Poecilopsetta_plinthus:67.4212,(Ammotretis_rostratus:45.4488,Rhombosolea_tapirina:45.4488):21.9725):14.3339):0.11229):7.92865):11.1398,((((Catathyridium_jenynsii:22.7141,Gymnachirus_texae:22.7141):25.6466,((Achirus_lineatus:29.5124,(Achirus_declivis:13.5019,Hypoclinemus_mentalis:13.5019):16.0105):12.201,Trinectes_paulistanus:41.7134):6.64737):50.1947,Trinectes_maculatus:98.5554):0.081501,((((Scophthalmus_rhombus:23.9139,(Psetta_maeotica:0.257187,Psetta_maxima:0.257187):23.6567):22.1119,(Zeugopterus_punctatus:35.3274,(Phrynorhombus_norvegicus:25.5847,(Lepidorhombus_boscii:14.202,Lepidorhombus_whiffiagonis:14.202):11.3826):9.74268):10.6984):10.6573,Scophthalmus_aquosus:56.6831):38.0433,(((Cynoglossus_browni:36.5175,(((Cynoglossus_canariensis:20.9003,Cynoglossus_zanzibarensis:20.9003):5.46322,Cynoglossus_semilaevis:26.3636):7.70326,Cynoglossus_senegalensis:34.0668):2.45064):18.1156,((Symphurus_tessellatus:10.3812,(Symphurus_plagiusa:0.078596,Symphurus_plagusia:0.078596):10.3026):41.7956,Symphurus_thermophilus:52.1768):2.45628):36.6208,(((((Heteromycteris_japonicus:71.2734,((Zebrias_quagga:33.4721,(Aesopia_cornuta:22.9565,Zebrias_zebra:22.9565):10.5156):18.6558,(Pseudaesopia_japonica:7.42645,Zebrias_crossolepis:7.42645):44.7015):19.1455):3.64279,((Austroglossus_pectoralis:70.1093,(((Solea_solea:20.5433,Synapturichthys_kleinii:20.5433):6.04068,((Pegusa_cadenati:15.2927,Pegusa_lascaris:15.2927):9.87727,Solea_senegalensis:25.17):1.41395):13.3828,(Dicologlossa_hexophthalma:20.4787,(Dicologlossa_cuneata:16.3452,((((Microchirus_ocellatus:10.7505,Monochirus_hispidus:10.7505):0.082659,Microchirus_variegatus:10.8331):1.08438,(Bathysolea_profundicola:8.18525,Microchirus_boscanion:8.18525):3.73224):3.12369,Microchirus_azevia:15.0412):1.30399):4.13348):19.4881):30.1425):4.72622,Achiroides_leucorhynchos:74.8355):0.08067):5.96111,(Aseraggodes_kaianus:3.49731,Aseraggodes_kobensis:3.49731):77.38):3.23894,Synaptura_lusitanica_lusitanica:84.1162):2.54482,Buglossidium_luteum:86.6611):4.59281):3.47252):3.91055):2.29893):2.20884,((Plagiopsetta_glossa:16.6415,Samariscus_xenicus:16.6415):81.044,(Citharoides_macrolepis:86.1475,(Citharus_linguatula:86.0574,Lepidoblepharon_ophthalmolepis:86.0574):0.090069):11.5381):5.45914):1.00127):1.44205):1.58663):1.35753):4.09933,((Polycentropsis_abbreviata:77.2891,((Macrognathus_zebrinus:37.1747,((Mastacembelus_mastacembelus:24.1876,(Mastacembelus_erythrotaenia:7.72501,Mastacembelus_armatus:7.72501):16.4626):8.24747,((Mastacembelus_taiaensis:26.6635,(Mastacembelus_cryptacanthus:23.676,(((Mastacembelus_frenatus:3.49601,(Mastacembelus_vanderwaali:3.23081,Mastacembelus_stappersii:3.23081):0.265201):5.22289,Mastacembelus_shiranus:8.7189):11.1295,((Mastacembelus_albomaculatus:2.82708,Mastacembelus_tanganicae:2.82708):11.4819,((Mastacembelus_moorii:10.2162,Mastacembelus_ophidium:10.2162):2.31158,(((Mastacembelus_flavidus:7.52927,(Mastacembelus_ellipsifer:6.23445,(Mastacembelus_plagiostomus:2.58129,Mastacembelus_zebratus:2.58129):3.65316):1.29482):2.88421,(Mastacembelus_platysoma:8.85005,Mastacembelus_micropectus:8.85005):1.56343):1.28744,Mastacembelus_cunningtoni:11.7009):0.826861):1.78124):5.53938):3.82762):2.98742):0.674072,(Mastacembelus_brachyrhinus:6.44627,Mastacembelus_signatus:6.44627):20.8913):5.09754):4.73968):28.2942,((Monopterus_albus:53.2527,(Ophisternon_aenigmaticum:18.0359,Synbranchus_marmoratus:18.0359):35.2168):0.125276,Indostomus_paradoxus:53.378):12.091):11.8202):6.62158,(((((((((Badis_kyar:11.3281,(Badis_badis:2.68718,Badis_kanabos:2.68718):8.64094):1.50996,(Badis_assamensis:3.01065,Badis_blosyrus:3.01065):9.82742):8.22848,(Badis_siamensis:11.4045,(Badis_khwae:7.03152,Badis_ruber:7.03152):4.37299):9.66205):0.387602,(Badis_corycaeus:4.52995,Badis_pyema:4.52995):16.9242):27.9207,(Nandus_oxyrhynchus:27.775,(Nandus_nebulosus:21.6762,Nandus_nandus:21.6762):6.09884):21.5998):3.20003,(Dario_dario:13.5574,Dario_hysginon:13.5574):39.0175):23.598,Monocirrhus_polyacanthus:76.1729):0.137146,(Pristolepis_marginata:9.19684,Pristolepis_fasciata:9.19684):67.1132):1.46354,((((Osphronemus_exodon:19.7768,(Osphronemus_goramy:16.5375,Osphronemus_septemfasciatus:16.5375):3.23932):48.8365,(((Ctenops_nobilis:47.4874,((Parasphaerichthys_ocellatus:35.1488,Parasphaerichthys_lineatus:35.1488):8.28451,((Sphaerichthys_acrostoma:11.6367,Sphaerichthys_vaillanti:11.6367):12.7103,(Sphaerichthys_selatanensis:13.9305,Sphaerichthys_osphromenoides:13.9305):10.4165):19.0863):4.05406):14.1586,(((((Trichopsis_schalleri:11.6682,Trichopsis_pumila:11.6682):2.08329,Trichopsis_vittata:13.7515):36.7112,(((Parosphromenus_paludicola:20.9123,Parosphromenus_ornaticauda:20.9123):5.50655,(Parosphromenus_anjunganensis:9.796,Parosphromenus_deissneri:9.796):16.6228):22.2641,(Betta_macrostoma:44.8709,((Betta_unimaculata:14.0176,(Betta_patoti:12.63,Betta_ocellata:12.63):1.38756):26.7925,(Betta_simorum:38.6738,((Betta_albimarginata:33.9108,(Betta_prima:20.549,(((Betta_breviobesus:12.9094,(((Betta_anabatoides:6.03586,((Betta_pi:2.57582,Betta_waseri:2.57582):1.3998,Betta_hipposideros:3.97562):2.06024):2.08695,Betta_chloropharynx:8.12281):3.9172,(((Betta_simplex:0.050409,Betta_falx:0.050409):5.23184,Betta_picta:5.28225):3.78217,(Betta_fusca:5.43096,Betta_pugnax:5.43096):3.63346):2.97559):0.869367):2.02514,Betta_edithae:14.9345):2.21778,Betta_dimidiata:17.1523):3.39667):13.3618):2.58114,((Betta_smaragdina:14.1697,(Betta_imbellis:5.65809,Betta_splendens:5.65809):8.51165):19.1346,((Betta_miniopinna:19.7654,(Betta_coccina:8.49261,(Betta_tussyae:7.08263,((Betta_burdigala:3.5443,Betta_uberis:3.5443):2.15648,(Betta_brownorum:2.18041,Betta_rutilans:2.18041):3.52036):1.38186):1.40998):11.2728):6.346,(Betta_foerschi:13.7157,Betta_strohi:13.7157):12.3957):7.19292):3.18761):2.18186):2.13621):4.06089):3.81198):1.77979):2.73258,((((Macropodus_erythropterus:0.900987,Macropodus_spechti:0.900987):21.2736,Macropodus_hongkongensis:22.1745):7.32752,Macropodus_opercularis:29.5021):19.2213,((Pseudosphromenus_dayi:30.4749,Pseudosphromenus_cupanus:30.4749):7.48504,Malpulutta_kretseri:37.96):10.7634):4.47186):6.23853,((Colisa_lalia:30.6989,((Colisa_labiosa:22.3648,Colisa_fasciata:22.3648):2.78547,Colisa_chuna:25.1502):5.54867):19.154,(Trichogaster_leerii:29.2097,(Trichogaster_pectoralis:18.8622,(Trichogaster_microlepis:16.0716,Trichogaster_trichopterus:16.0716):2.79059):10.3475):20.6432):9.58083):2.21219):4.66741,(Belontia_signata:45.4002,Belontia_hasselti:45.4002):20.9132):2.29987):2.81023,((((Sandelia_capensis:39.4061,((((Microctenopoma_damasi:10.4742,(Microctenopoma_nanum:8.13799,Microctenopoma_ansorgii:8.13799):2.33618):3.58449,Microctenopoma_fasciolatum:14.0587):17.6913,Ctenopoma_muriei:31.7499):3.0358,(Ctenopoma_nebulosum:23.7864,(Ctenopoma_kingsleyae:17.2572,((Ctenopoma_acutirostre:2.46724,Ctenopoma_ocellatum:2.46724):7.68502,Ctenopoma_petherici:10.1523):7.10489):6.52928):10.9993):4.62034):2.82416,(Ctenopoma_nigropannosum:6.00271,Ctenopoma_pellegrini:6.00271):36.2275):17.1494,Anabas_testudineus:59.3797):9.37141,Helostoma_temminkii:68.7511):2.67242):5.01227,(Parachanna_obscura:71.2747,((Channa_lucius:33.8378,(Channa_diplogramma:19.884,(Channa_pleurophthalma:17.7562,Channa_micropeltes:17.7562):2.12776):13.9538):13.3031,((Channa_maculata:27.8116,Channa_asiatica:27.8116):14.8038,(((Channa_punctata:21.6082,(((Channa_orientalis:4.81082,Channa_gachua:4.81082):4.61726,Channa_bleheri:9.42808):2.3531,Channa_aurantimaculata:11.7812):9.82704):11.3795,(Channa_striata:23.6929,Channa_melasoma:23.6929):9.29483):3.91767,(Channa_marulioides:22.6993,Channa_marulia:22.6993):14.2062):5.70993):4.52549):24.1339):5.16105):1.33779):6.13717):28.7208):1.3528):1.17081):1.21581):1.53884,(Lepidogobius_lepidus:110.479,((Pterois_lunulata:54.3558,((((Platycephalus_bassensis:20.0284,Elates_ransonnettii:20.02843):4.99621,Platycephalus_richardsoni:25.0246):24.6319,Grammoplites_scaber:49.6565):0.099315,Kurtus_gulliveri:49.7558):4.59996):52.6186,((((Milyeringa_brooksi:3.44087,Milyeringa_veritas:3.44087):77.0536,((((Odontobutis_hikimius:30.6437,((Odontobutis_haifengensis:15.3406,Odontobutis_sinensis:15.3406):1.9405,Odontobutis_yaluensis:17.2811):13.3626):6.77953,Odontobutis_obscura:37.4232):23.3504,Perccottus_glenii:60.7736):10.743,Micropercops_swinhonis:71.5166):8.97786):6.62111,((Protogobius_attiti:36.1733,Rhyacichthys_aspro:36.1733):47.4843,(((((((Bostrychus_sinensis:31.5597,Ophiocara_porocephala:31.5597):5.64722,(Oxyeleotris_nullipora:32.326,(Oxyeleotris_urophthalmoides:27.7997,(Oxyeleotris_marmorata:26.471,(Oxyeleotris_lineolata:12.034,Oxyeleotris_selheimi:12.034):14.437):1.32864):4.52636):4.88086):13.7799,Kribia_nana:50.9868):6.47906,((Butis_butis:24.8845,Butis_melanostigma:24.8845):4.36784,Butis_koilomatodon:29.2523):28.2135):1.10296,Butis_amboinensis:58.5688):16.2113,(((Mogurnda_adspersa:2.73772,Mogurnda_mogurnda:2.73772):36.8269,(Ratsirakia_legendrei:32.8057,Tateurndina_ocellicauda:32.8057):6.75893):11.1518,((((Guavina_micropus:29.6235,(Dormitator_latifrons:13.4165,Dormitator_maculatus:13.4165):16.207):10.4135,(Gobiomorus_dormitor:29.008,Hemieleotris_latifasciata:29.008):11.0289):5.88323,(((Eleotris_fusca:18.8667,Eleotris_melanosoma:18.8667):18.2638,((Eleotris_picta:0.814715,Eleotris_pisonis:0.814715):33.3852,(Eleotris_amblyopsis:30.6106,((Eleotris_sandwicensis:2.56406,Eleotris_acanthopoma:2.56406):23.1997,Erotelis_smaragdus:25.7637):4.84688):3.58935):2.93051):6.34803,(((Hypseleotris_compressa:9.73907,Hypseleotris_aurea:9.73907):3.74561,(Hypseleotris_galii:10.1086,Hypseleotris_klunzingeri:10.1086):3.37606):28.2724,((Eleotris_oxycephala:33.9546,Calumia_godeffroyi:33.9546):5.776,(Gobiomorphus_australis:34.5543,(Gobiomorphus_coxii:32.0408,((Philypnodon_macrostomus:19.9764,Philypnodon_grandiceps:19.9764):11.1856,(Gobiomorphus_hubbsi:19.4886,((Gobiomorphus_basalis:2.23522,Gobiomorphus_cotidianus:2.23522):4.85553,(Gobiomorphus_breviceps:5.64941,(Gobiomorphus_gobioides:3.57449,Gobiomorphus_huttoni:3.57449):2.07492):1.44134):12.3979):11.6734):0.87871):2.51358):5.17628):2.0265):1.72137):2.44172):3.48454,(Leptophilypnus_fluviatilis:31.6916,Leptophilypnus_panamensis:31.6916):17.7131):1.31161):24.0638):6.30163,((((Evorthodus_minutus:59.4709,(Ctenogobius_saepepallens:51.2854,(Oxyurichthys_tentacularis:36.6958,(Lentipes_concolor:22.084,(Ctenogobius_shufeldti:21.8289,Ctenogobius_sagittula:21.8289):0.255026):14.6118):14.5896):8.18551):7.79737,((Sicydium_plumieri:20.0241,Sicydium_crenilabrum:20.0241):7.94515,(Stiphodon_elegans:24.6235,(Sicyopterus_stimpsoni:16.8904,(Sicyopterus_japonicus:10.372,Sicyopterus_lagocephalus:10.372):6.51843):7.73314):3.34567):39.299):3.29527,(((Gobiopterus_semivestitus:57.9782,(Pseudapocryptes_elongatus:51.3121,((Knipowitschia_caucasica:28.4958,(Gobiusculus_flavescens:25.8719,(((Pomatoschistus_pictus:23.5011,((((Pomatoschistus_microps:5.88008,(Pomatoschistus_tortonesei:2.46915,Pomatoschistus_knerii:2.46915):3.41093):8.46568,Pomatoschistus_canestrinii:14.3458):3.52455,((Knipowitschia_punctatissima:12.6441,((Pomatoschistus_bathi:5.25697,Pomatoschistus_quagga:5.25697):6.33102,(Knipowitschia_panizzae:6.09183,Knipowitschia_milleri:6.09183):5.49616):1.05609):1.78823,Economidichthys_pygmaeus:14.4323):3.43798):3.4771,Pomatoschistus_minutus:21.3474):2.15365):0.107564,Pomatoschistus_marmoratus:23.6086):0.110844,Pseudaphya_ferreri:23.7195):2.15243):2.62392):12.0616,(Deltentosteus_quadrimaculatus:17.3673,Buenia_affinis:17.3673):23.1901):10.7548):6.66604):0.099855,Crystallogobius_linearis:58.078):11.5321,((((((Boleophthalmus_pectinirostris:23.9832,Scartelaos_histophorus:23.9832):7.56534,(Taenioides_limicola:24.9537,Odontamblyopus_rubicundus:24.9537):6.59484):7.86211,((Periophthalmus_magnuspinnatus:0.520863,Periophthalmus_modestus:0.520863):30.2206,(Periophthalmus_barbarus:23.445,Periophthalmus_argentilineatus:23.445):7.29646):8.66917):11.3718,Awaous_guamensis:50.7825):9.56947,(Coryphopterus_personatus:44.1289,(Oligolepis_acutipennis:40.4876,(Sicyopterus_longifilis:21.6878,Stiphodon_ornatus:21.6878):18.79985):3.64129):16.2231):7.682,(((Sagamia_geneionema:40.8645,((Pterogobius_virgo:14.474,Pterogobius_zacalles:14.474):20.4463,(Pterogobius_elapoides:14.9574,Pterogobius_zonoleucus:14.9574):19.9629):5.94426):21.2101,((((Redigobius_bikolanus:40.3939,Eugnathogobius_oligactis:40.3939):14.4775,Gobiopterus_brachypterus:54.8713):6.19157,(Rhinogobiops_nicholsii:52.7767,((Tridentiger_barbatus:45.8072,(Tridentiger_nudicervicus:45.7291,(Tridentiger_bifasciatus:32.545,Tridentiger_trigonocephalus:32.545):13.184):0.078119):3.14388,(Tridentiger_kuroiwae:11.0047,(Tridentiger_brevispinis:4.57672,Tridentiger_obscurus:4.57672):6.42799):37.9464):3.82561):8.2862):0.360427,((Acanthogobius_flavimanus:16.7645,Synechogobius_hasta:16.7645):39.6381,Mugilogobius_rivulus:56.4026):5.02069):0.651249):2.28844,((((Rhinogobius_rubromaculatus:21.774,Rhinogobius_candidianus:21.774):19.4268,Rhinogobius_giurinus:41.2009):20.6481,((Leucopsarion_petersii:46.8019,((((Brachygobius_kabiliensis:12.4449,Brachygobius_doriae:12.4449):4.93081,Brachygobius_xanthomelas:17.3757):16.3471,(Pandaka_lidwilli:4.82341,Pandaka_trimaculata:4.82341):28.8994):11.986,Eutaeniichthys_gilli:45.7088):1.09307):6.97116,(((Gymnogobius_isaza:8.85983,Gymnogobius_urotaenia:8.85983):26.0413,((Gillichthys_seta:16.7482,Gillichthys_mirabilis:16.7482):15.5686,((((((Clariger_cosmurus:5.92233,Clariger_exilis:5.92233):7.00164,Astrabe_flavimaculata:12.924):2.03855,(Luciogobius_koma:11.9826,Luciogobius_saikaiensis:11.9826):2.97995):5.36986,((Luciogobius_pallidus:16.5406,((Luciogobius_parvulus:8.18717,Luciogobius_platycephalus:8.18717):6.52996,(Luciogobius_elongatus:11.6371,Luciogobius_adapel:11.6371):3.08):1.82348):1.88015,Luciogobius_grandis:18.4208):1.91162):4.70438,Luciogobius_guttatus:25.0368):4.03448,Chaenogobius_gulosus:29.0713):3.24559):2.58432):4.30136,(Typhlogobius_californiensis:37.2831,((Quietula_y-cauda:0.060731,Clevelandia_ios:0.060731):25.3973,Lethops_connectens:25.458):11.8251):1.9194):14.5705):8.07597):2.42658,((Mugilogobius_chulae:24.9032,Mugilogobius_abei:24.9032):9.68557,Mugilogobius_parvus:34.5888):29.6868):0.087429):3.67096):1.5762):0.953352):5.04369,(((((((Valenciennea_strigata:52.2171,Amblyeleotris_guttata:52.2171):5.35348,Exyrias_puntang:57.5706):7.6958,(((Eviota_prasina:54.7441,(Acentrogobius_pflaumii:47.3945,(Cerdale_floridana:25.3659,(Microdesmus_retropinnis:20.7036,Microdesmus_longipinnis:20.7036):4.66234):22.0286):7.34954):6.78431,((((Koumansetta_hectori:42.1485,(((Gobiodon_quinquestrigatus:17.647,Gobiodon_rivulatus:17.647):8.99969,(Gobiodon_reticulatus:24.9411,((((Gobiodon_citrinus:11.1163,Gobiodon_okinawae:11.1163):1.97107,(Gobiodon_acicularis:6.9108,Gobiodon_ceramensis:6.9108):6.17659):8.99296,(Gobiodon_axillaris:16.5143,Gobiodon_unicolor:16.5143):5.56602):0.09529,(Gobiodon_heterospilos:12.095,(Gobiodon_histrio:2.43785,Ptereleotris_zebra:2.43785):9.65713):10.0807):2.76545):1.70563):1.69385,Gobiodon_brochus:28.3406):13.8079):9.05871,((Ptereleotris_heteroptera:32.6666,Ptereleotris_evides:32.6666):18.4677,((Pleurosicya_micheli:32.1746,Pleurosicya_prognatha:32.1746):11.9325,(Bryaninops_ridens:17.2905,Bryaninops_natans:17.2905):26.8166):7.02716):0.072967):3.9902,Ptereleotris_calliura:55.1974):4.30384,Eviota_guttata:59.5013):2.02714):1.34745,Pseudogobius_olorum:62.87581):2.39051):3.14309,(((Bathygobius_fuscus:40.3659,(((Bathygobius_soporator:27.7254,Bathygobius_cocosensis:27.7254):0.13951,Vanderhorstia_mertensi:27.8649):12.3471,((Lesueurigobius_friesii:20.6808,Lesueurigobius_suerii:20.6808):11.8091,Aphia_minuta:32.4899):7.72203):0.153949):20.8607,Gunnellichthys_monostigma:61.2267):4.73742,((((Microgobius_carri:23.6053,(Microgobius_thalassinus:17.7937,((Microgobius_microlepis:11.9752,(Microgobius_brevispinis:9.97294,Microgobius_gulosus:9.97294):2.0023):2.12176,Microgobius_emblematicus:14.097):3.69667):5.81167):0.167991,Microgobius_erectus:23.7733):30.8031,(Bollmannia_boqueronensis:9.3674,(Bollmannia_marginalis:9.10346,(Bollmannia_chlamydes:6.56661,Bollmannia_communis:6.56661):2.53685):0.263942):45.209):9.94376,((((((Thorogobius_macrolepis:43.356,Chromogobius_zebratus:43.356):5.49854,(Vanneaugobius_canariensis:40.192,Zebrus_zebrus:40.192):8.66259):0.071225,(((((((Gobius_vittatus:17.5727,(Gobius_couchi:17.4761,Gobius_fallax:17.4761):0.096578):4.20694,(Zosterisessor_ophiocephalus:19.5931,Gobius_bucchichi:19.5931):2.18652):11.066,(Gobius_auratus:5.89447,Gobius_xanthocephalus:5.89447):26.9512):3.74248,(Gobius_geniporus:22.7824,Gobius_cruentatus:22.7824):13.8057):0.641335,Kraemeria_cunicularia:37.2295):1.02643,Gobius_niger:38.2559):6.76531,((Neogobius_caspius:23.0022,(Neogobius_melanostomus:19.3681,(Neogobius_fluviatilis:10.9314,Neogobius_pallasi:10.9314):8.43664):3.63413):12.7203,(((Ponticola_syrman:13.1533,(Babka_gymnotrachelus:10.7895,((Neogobius_ratan:6.69037,(Ponticola_eurycephalus:2.80663,(Ponticola_gorlap:2.3611,Ponticola_kessleri:2.3611):0.445528):3.88374):1.06377,((Ponticola_cyrius:3.263,(Neogobius_rhodioni:1.48256,Neogobius_platyrostris:1.48256):1.78044):0.803293,Neogobius_cephalargoides:4.06629):3.68784):3.0354):2.36381):6.21093,(Mesogobius_batrachocephalus:15.3235,(Proterorhinus_marmoratus:4.16625,Proterorhinus_semipellucidus:4.16625):11.1573):4.04074):13.952,(Caspiosoma_caspium:15.6642,((Benthophilus_stellatus:1.10362,Benthophilus_mahmudbejovi:1.10362):5.02165,(Benthophilus_magistri:3.42941,Benthophilus_granulosus:3.42941):2.69587):9.53891):17.6521):2.40618):9.29877):3.90456):4.83377,(Vanneaugobius_pruvoti:49.0548,((Padogobius_nigricans:35.1711,(Gobius_cobitis:20.7748,Gobius_paganellus:20.7748):14.3963):11.2957,Padogobius_bonelli:46.4667):2.58807):4.70478):2.28522,Glossogobius_olivaceus:56.0448):6.52581,((((Gobulus_birdsongi:26.9542,Nes_longus:26.9542):12.3319,Aboma_etheostoma:39.2861):16.0113,(Psilotris_batrachodes:41.2756,Chriolepis_zebra:41.2756):14.0219):4.44327,(Favonigobius_reichei:59.6635,(((Barbulifer_ceuthoecus:37.5135,Aruma_histrio:37.5135):8.11794,(((((((Enypnias_aceras:14.5784,Gobiosoma_paradoxum:14.5784):5.98968,(Gobiosoma_robustum:17.4325,(Gobiosoma_ginsburgi:15.6089,Gobiosoma_bosc:15.6089):1.82359):3.13557):0.130479,Enypnias_seminudus:20.6986):3.42095,(Gobiosoma_nudum:20.0142,Gobiosoma_spilotum:20.0142):4.10526):3.64309,(Gobiosoma_homochroma:18.3055,Gobiosoma_hildebrandi:18.30551):9.45708):6.80872,Gobiosoma_chiquita:34.5713):5.71011,(Amblygobius_nocturnus:28.2371,Ptereleotris_microlepis:28.2371):12.0443):5.35006):3.77907,(((Elacatinus_puncticulatus:29.8307,((Elacatinus_randalli:13.2119,(Elacatinus_figaro:10.9639,(((Elacatinus_atronasus:6.63361,(Elacatinus_evelynae:3.94378,Elacatinus_oceanops:3.94378):2.68983):0.819833,Elacatinus_genie:7.45344):1.98499,(Elacatinus_illecebrosus:8.02158,Elacatinus_prochilos:8.02158):1.41685):1.52542):2.24808):5.09703,((((Elacatinus_chancei:3.59323,Elacatinus_lori:3.59323):1.04096,Elacatinus_horsti:4.63419):1.35627,Elacatinus_louisae:5.99046):3.38527,Elacatinus_xanthiprora:9.37573):8.93323):11.5218):6.57809,(Elacatinus_dilepis:23.4049,(Elacatinus_saucrus:8.72443,Elacatinus_macrodon:8.72443):14.6804):13.004):6.4764,(((((Evermannichthys_metzelaari:7.1956,Risor_ruber:7.1956):20.6051,Elacatinus_pallens:27.8007):4.42778,Elacatinus_gemmatus:32.2285):6.39641,(Elacatinus_multifasciatus:32.126,Ginsburgellus_novemlineatus:32.126):6.49886):1.56159,(Elacatinus_janssi:34.5772,((Elacatinus_digueti:6.74587,(Elacatinus_nesiotes:0.43571,Elacatinus_inornatus:0.43571):6.31016):8.72491,Elacatinus_limbaughi:15.4708):19.1064):5.60927):2.69877):6.52533):10.2529):0.077202):2.82991):1.94959):1.44388):2.44538):2.47993,(((Callogobius_bifasciatus:37.5737,Callogobius_sclateri:37.5737):12.2319,Ctenogobiops_feroculus:49.8055):0.960013,Glossogobius_celebius:50.7656):20.1238):1.9183,((Amblygobius_phalaena:64.1813,Trimma_avidori:64.1813):6.57263,((Favonigobius_lateralis:55.863,(Lophogobius_cyprinoides:39.8435,(Coryphopterus_dicrus:31.1309,Eucyclogobius_newberryi:31.1309):8.71254):16.0196):8.12792,((Drombus_triangularis:29.4459,Drombus_ocyurus:29.4459):17.8564,Acentrogobius_viridipunctatus:47.3023):16.6887):6.76295):2.05378):1.46603,((Paragobiodon_xanthosoma:13.1059,Paragobiodon_echinocephalus:13.1059):49.3355,(Gnatholepis_anjerensis:30.9473,(Asterropteryx_semipunctata:15.3938,(Gnatholepis_cauerensis_cauerensis:4.05897,Gnatholepis_thompsoni:4.05897):11.3348):15.5536):31.4941):11.8323):1.3335):5.47454):2.57582):3.458):15.0157,(Fowleria_aurita:71.1043,(((Apogon_doederleini:30.2432,Apogon_semilineatus:30.2432):30.8013,(((Apogon_smithi:44.4138,((Siphamia_versicolor:29.4256,Apogonichthyoides_pharaonis:29.4256):9.9596,Apogon_queketti:39.3852):5.02859):1.19878,((Apogon_imberbis:2.75337,Apogon_pacificus:2.75337):3.66759,(Apogon_atradorsatus:6.2778,Apogon_guadalupensis:6.2778):0.143163):39.1916):12.5678,((((Archamia_biguttata:8.38552,Archamia_fucata:8.38552):39.5509,((Apogon_maculatus:30.3367,Apogon_exostigma:30.3367):8.01787,Apogon_kallopterus:38.3546):9.5818):0.247797,((Apogon_aureus:10.3864,Apogon_apogonides:10.3864):0.97042,Cheilodipterus_macrodon:11.3569):36.8274):5.04717,(Ostorhinchus_leslie:12.3353,Ostorhinchus_luteus:12.3353):40.8961):4.94899):2.86409):0.194248,(Apogon_quadrifasciatus:36.7159,Sphaeramia_nematoptera:36.7159):24.5228):9.86558):31.027):4.84309):3.50484):7.43052):2.10306,(((Halobatrachus_didactylus:41.2782,Porichthys_plectrodon:41.2782):0.116247,Opsanus_pardus:41.3945):75.7835,(((((Corythoichthys_intestinalis:37.4396,Corythoichthys_haematopterus:37.4396):59.5074,(((Haliichthys_taeniophorus:82.6857,((Stigmatopora_argus:3.28279,Stigmatopora_nigra:3.28279):71.1863,((Vanacampus_margaritifer:63.8815,((Syngnathus_leptorhynchus:19.6953,((Syngnathus_auliscus:16.0149,(Syngnathus_typhle:1.89376,Syngnathus_taenionotus:1.89376):14.1211):3.57851,Syngnathus_exilis:19.5934):0.101898):43.2979,(Idiotropiscis_lumnitzeri:58.2871,((Hippocampus_bargibanti:34.2635,Hippocampus_camelopardalis:34.2635):0.103069,(((Hippocampus_comes:15.6364,Hippocampus_barbouri:15.6364):5.85261,(Hippocampus_whitei:17.2558,(Hippocampus_abdominalis:7.71671,Hippocampus_breviceps:7.71671):9.53909):4.23325):5.89949,((((Hippocampus_sindonis:10.8867,Hippocampus_coronatus:10.8867):9.10856,Hippocampus_mohnikei:19.9952):1.98753,Hippocampus_trimaculatus:21.9827):5.27446,(Hippocampus_angustus:22.5562,((((Hippocampus_fisheri:6.54503,((Hippocampus_kuda:4.35375,(Hippocampus_capensis:4.11322,Hippocampus_fuscus:4.11322):0.240524):1.33912,(Hippocampus_reidi:1.71491,Hippocampus_algiricus:1.71491):3.97796):0.852164):0.998679,Hippocampus_ingens:7.5437):8.65315,(((Hippocampus_hippocampus:6.03595,(Hippocampus_erectus:0.454848,Hippocampus_patagonicus:0.454848):5.5811):5.2462,Hippocampus_zosterae:11.2822):2.86022,Hippocampus_guttulatus:14.1424):2.05447):1.99859,(Hippocampus_kelloggi:14.0635,(Hippocampus_spinosissimus:3.05344,Hippocampus_queenslandicus:3.05344):11.0101):4.13194):4.36079):4.70097):0.13134):6.97804):23.9205):4.70611):0.888307):1.13627,Hippichthys_penicillus:65.0178):9.45132):8.2166):5.89927,(((Vanacampus_poecilolaemus:21.2591,(Pugnaso_curtirostris:19.8244,Kaupus_costatus:19.8244):1.43463):52.6293,((Syngnathus_fuscus:18.3157,Syngnathus_scovelli:18.3157):17.7125,((Syngnathus_floridae:5.65766,Syngnathus_louisianae:5.65766):26.0305,(((Syngnathus_rostellatus:2.70229,Syngnathus_abaster:2.70229):15.0744,(Nerophis_lumbriciformis:17.5318,Syngnathus_acus:17.5318):0.244903):7.88814,Syngnathus_schlegeli:25.6648):6.02339):4.34001):37.8601):7.56947,((Entelurus_aequoreus:29.712,Nerophis_ophidion:29.712):39.6711,((Doryrhamphus_dactyliophorus:45.88,Doryrhamphus_excisus_excisus:45.88):11.4617,Microphis_brachyurus_brachyurus:57.3418):12.0414):12.0747):7.12719):4.85825,((Urocampus_carinirostris:72.071,Syngnathoides_biaculeatus:72.071):14.2889,(((Solegnathus_hardwickii:8.5919,Solegnathus_lettiensis:8.5919):2.04195,Solegnathus_dunckeri:10.6338):21.7252,(Phycodurus_eques:19.7492,Phyllopteryx_taeniolatus:19.7492):12.6099):54.0009):7.08327):3.50385):15.0716,((((Lesueurina_platycephala:72.5327,((((Upeneichthys_stotti:14.2961,(Upeneichthys_vlamingii:5.73716,Upeneichthys_lineatus:5.73716):8.55897):42.576,(Upeneus_sulphureus:53.3928,((Mullus_barbatus_ponticus:5.18356,Mullus_barbatus:5.18356):37.6624,((Mullus_surmuletus:6.24831,Pseudupeneus_maculatus:6.24831):27.8983,Pseudupeneus_prayensis:34.1466):8.69933):10.5469):3.47936):5.08193,Upeneus_tragula:61.9541):10.4312,(Upeneus_pori:53.5632,(Pseudupeneus_grandisquamis:40.2426,Upeneus_moluccensis:40.2426):13.3206):18.8221):0.147367):21.3443,((Champsodon_atridorsalis:89.5856,Champsodon_snyderi:89.5856):0.077982,Draconetta_xenica:89.6636):4.21336):8.39754,(Dactyloptena_orientalis:24.3008,Dactylopterus_volitans:24.3008):77.9737):5.80149,((Aulostomus_chinensis:105.801,Aulostomus_maculatus:105.801):0.085023,(Aeoliscus_strigatus:105.769,Macroramphosus_scolopax:105.769):0.11738):2.19):3.94264):2.24292,((Fistularia_commersonii:21.8882,(Fistularia_corneta:21.7389,Fistularia_petimba:21.7389):0.149272):81.5311,((Callionymus_schaapii:59.9243,(Synchiropus_ocellatus:39.9175,(Callionymus_lyra:39.7819,Callionymus_maculatus:39.7819):0.135584):20.0068):43.4283,(Callionymus_bairdi:46.2989,Tonlesapia_tsukawakii:46.2989):57.0537):0.06671):10.8423):2.85022,(Parataeniophorus_brevis:107.456,Pegasus_volitans:107.456):9.65571):0.06623):2.83479):3.23041):6.05909):2.53584):1.94777):7.05405,(((Regalecus_glesne:53.6963,(Desmodema_lorum:46.2297,((Trachipterus_jacksonensis:8.17351,Trachipterus_trachypterus:8.17351):33.2373,(Trachipterus_arcticus:34.3873,Zu_cristatus:34.3873):7.02342):4.81897):7.46654):34.735,((Metavelifer_multiradiatus:2.58283,Velifer_hypselopterus:2.58283):61.1976,(Lampris_guttatus:63.6698,Lampris_immaculatus:63.6698):0.110602):24.6509):23.5082,(Lophotus_capellei:111.824,Lophotus_lacepede:111.824):0.115908):28.9005):3.47825,(Polymixia_nobilis:26.0121,((Polymixia_japonica:17.5637,Polymixia_lowei:17.5637):0.167603,Polymixia_berndti:17.7313):8.28076):118.306):7.68178,(((((Zenopsis_conchifer:29.2029,Zeus_faber:29.2029):29.648,((Grammicolepis_brachiusculus:30.924,Xenolepidichthys_dalgleishi:30.924):0.161696,((Cyttus_australis:15.6547,(Allocyttus_folletti:15.4503,(((Allocyttus_verrucosus:3.0799,(Neocyttus_helgae:3.00958,Neocyttus_rhomboidalis:3.00958):0.070327):2.64966,Pseudocyttus_maculatus:5.72956):1.26842,Allocyttus_niger:6.99799):8.45227):0.204441):12.0641,Cyttus_traversi:27.7188):3.36682):27.7652):25.1491,Zenopsis_nebulosa:84.0):56.1745,((Muraenolepis_marmorata:97.6768,(((((((Phycis_blennoides:10.7799,Phycis_chesteri:10.7799):7.52531,(((Urophycis_floridana:4.87582,Urophycis_regia:4.87582):3.08835,Urophycis_chuss:7.96416):2.81153,Urophycis_tenuis:10.7757):7.52955):16.6304,Phycis_phycis:34.9356):27.4031,(((((Gadus_ogac:15.7601,(((Gadus_morhua:3.76126,(Arctogadus_borisovi:3.22529,(Melanogrammus_aeglefinus:2.36198,Merlangius_merlangus:2.36198):0.863317):0.535965):1.83793,Theragra_chalcogramma:5.59919):6.00145,Gadus_macrocephalus:11.6006):4.15948):16.9504,((Boreogadus_saida:10.2324,(Pollachius_pollachius:9.70177,Pollachius_virens:9.70177):0.530628):12.2139,(Microgadus_tomcod:12.9825,((Eleginus_gracilis:2.3952,Eleginus_nawaga:2.3952):2.86709,Microgadus_proximus:5.26229):7.72024):9.46374):10.2643):3.50577,(Gadiculus_argenteus:32.9108,((Micromesistius_australis:4.47895,Micromesistius_poutassou:4.47895):24.9258,((Trisopterus_minutus:11.0802,Trisopterus_esmarkii:11.0802):4.91955,Trisopterus_luscus:15.9997):13.405):3.50606):3.30546):15.3902,(((((Molva_macrophthalma:7.48499,Molva_dypterygia:7.48499):7.48052,Molva_molva:14.9655):11.9698,Brosme_brosme:26.9353):7.78824,Lota_lota:34.7235):16.7344,(Ciliata_mustela:13.5997,Ciliata_septentrionalis:13.5997):37.8583):0.148573):3.1938,(Gaidropsarus_mediterraneus:30.962,((Enchelyopus_cimbrius:21.185,(Gaidropsarus_argentatus:1.93397,Gaidropsarus_ensis:1.93397):19.251):4.08165,Gaidropsarus_biscayensis:25.2667):5.69536):23.8383):7.53835):7.64282,(((Steindachneria_argentea:48.5152,(Macruronus_magellanicus:34.6374,Macruronus_novaezelandiae:34.6374):13.8778):15.4073,Euclichthys_polynemus:63.9225):2.64468,(((((Merluccius_merluccius:5.94628,Merluccius_capensis:5.94628):2.7349,(Merluccius_paradoxus:4.84933,Merluccius_polli:4.84933):3.83184):7.6234,(Merluccius_bilinearis:10.6321,(Merluccius_australis:7.96571,(((Merluccius_productus:1.4584,(Merluccius_angustimanus:1.26634,Merluccius_hernandezi:1.26634):0.192059):1.78947,Merluccius_gayi_gayi:3.24786):3.75336,(Merluccius_albidus:5.98074,Merluccius_hubbsi:5.98074):1.02048):0.964494):2.66634):5.67252):46.2248,((Melanonus_gracilis:8.15627,Melanonus_zugmayeri:8.15627):50.641,((((Lotella_rhacina:32.9804,(Pseudophycis_barbata:13.4555,Pseudophycis_bachus:13.4555):19.5249):14.3921,((((Antimora_microlepis:0.9089,Antimora_rostrata:0.9089):10.3818,(Lepidion_eques:3.53013,Lepidion_ensiferus:3.53013):7.76061):20.5691,Halargyreus_johnsonii:31.8599):12.4865,(Physiculus_fulvus:17.4225,(Gadella_jordani:6.54903,Physiculus_japonicus:6.54903):10.8734):26.9239):3.0261):0.631118,(Laemonema_barbatulum:0.105272,Laemonema_goodebeanorum:0.105272):47.8983):0.10332,(Laemonema_longipes:39.9696,Mora_moro:39.9696):8.13731):10.6904):3.73211):3.14818,((((((Malacocephalus_laevis:22.083,Malacocephalus_occidentalis:22.083):18.8501,(((((((((Coryphaenoides_subserrulatus:2.39636,Coryphaenoides_serrulatus:2.39636):10.2306,((Coryphaenoides_cinereus:3.64342,(Albatrossia_pectoralis:1.22069,Coryphaenoides_acrolepis:1.22069):2.42273):1.60509,Coryphaenoides_longifilis:5.24851):7.37848):1.98147,(Coryphaenoides_zaniophorus:10.6504,((Coryphaenoides_guentheri:7.63815,(Coryphaenoides_paramarshalli:2.69037,Coryphaenoides_marshalli:2.69037):4.94779):2.47604,(Coryphaenoides_dossenus:8.83,Coryphaenoides_alateralis:8.83):1.28419):0.536252):3.95802):1.49612,Coryphaenoides_nasutus:16.1046):0.143523,Coryphaenoides_rupestris:16.2481):2.82772,(Coryphaenoides_marginatus:18.7995,Coryphaenoides_filifer:18.7995):0.276307):12.7739,((Macrourus_berglax:5.0508,Macrourus_carinatus:5.0508):14.9347,((((Coelorinchus_caelorhincus:2.1818,Coelorinchus_geronimo:2.1818):1.97356,Coelorinchus_polli:4.15536):8.34272,Coelorinchus_caribbaeus:12.4981):4.72584,(Coelorinchus_scaphopsis:16.9701,((((((Coelorinchus_multispinulosus:5.72903,Coelorinchus_formosanus:5.72903):0.129261,(Coelorinchus_kamoharai:4.41335,Coelorinchus_longissimus:4.41335):1.44494):4.2969,(((((Coelorinchus_productus:4.04878,Coelorinchus_anatirostris:4.04878):0.214637,(Coelorinchus_japonicus:2.77417,Coelorinchus_smithi:2.77417):1.48924):2.17697,Coelorinchus_hubbsi:6.44038):0.068351,(Coelorinchus_longicephalus:4.67946,Coelorinchus_macrochir:4.67946):1.82927):1.62557,(Coelorinchus_jordani:5.31141,Coelorinchus_kishinouyei:5.31141):2.82289):2.02089):2.21275,((Coelorinchus_acanthiger:5.75377,Coelorinchus_kermadecus:5.75377):6.00357,(Coelorinchus_oliverianus:11.0626,(Coelorinchus_kaiyomaru:8.96934,Coelorinchus_innotabilis:8.96934):2.09326):0.694736):0.610606):2.16818,Coelorinchus_matamua:14.5361):1.02695,((Coelorinchus_parvifasciatus:5.04628,Coelorinchus_fasciatus:5.04628):3.66441,(Coelorinchus_bollonsi:2.68439,(Coelorinchus_aspercephalus:1.67266,Coelorinchus_biclinozonalis:1.67266):1.01173):6.02631):6.85238):1.40701):0.253831):2.76162):11.8642):1.8998,Coryphaenoides_yaquinae:33.7495):4.29872,(((Mesobius_antipodum:27.39446,(((Nezumia_duodecim:10.3722,(Nezumia_africana:2.4622,Nezumia_micronychodon:2.4622):7.91005):1.0486,(Nezumia_aequalis:5.21107,Nezumia_milleri:5.21107):6.20978):1.72854,(Nezumia_liolepis:8.34571,Sphagemacrurus_pumiliceps:8.34571):4.80368):14.2451):4.53878,Lucigadus_nigromaculatus:31.9333):2.3216,((Hymenocephalus_italicus:5.77143,Hymenocephalus_longiceps:5.77143):22.8788,Ventrifossa_garmani:28.6503):5.6046):3.79337):2.88481):15.1476,(((Bathygadus_favosus:6.13987,Bathygadus_macrops:6.13987):2.43583,Bathygadus_melanobranchus:8.57569):9.98439,(Gadomus_colletti:0.123063,Gadomus_dispar:0.123063):18.437):37.5206):1.99654,Bathygadus_antrodes:58.0772):4.87866,((Trachyrincus_scabrus:12.372,Squalogadus_modificatus:12.372):5.364,Trachyrincus_murrayi:17.736):45.2199):2.61884,Hymenocephalus_striatissimus_striatissimus:65.5747):0.102887):0.889598):3.41432):2.71991,(Lyconus_brachycolus:1.52372,Lyconus_pinnatus:1.52372):71.1777):1.40654,Raniceps_raninus:74.108):23.5689):24.8874,Bregmaceros_cantori:122.564):17.6103):7.04051,(Limnichthys_fasciatus:121.878,(Chologaster_cornuta:71.8118,(Aphredoderus_sayanus:71.7106,(Percopsis_omiscomaycus:71.6206,Percopsis_transmontana:71.6206):0.089935):0.101263):50.0659):25.3373):4.78501):4.19561,(((Ateleopus_japonicus:1.69845,Ateleopus_purpureus:1.69845):3.15473,Ateleopus_tanabensis:4.85318):2.97744,Ijimaia_antillarum:7.83062):148.365):0.067795,(((((Lobianchia_dofleini:32.651,Lobianchia_gemellarii:32.651):28.5742,((Lampanyctus_macdonaldi:23.1617,Nannobrachium_lineatum:23.1617):36.1403,(((((Bolinichthys_longipes:21.71231,(Lampadena_urophaos_urophaos:14.1681,Lampadena_luminosa:14.1681):7.54422):2.31185,(Notoscopelus_caudispinosus:20.8821,(Scopelopsis_multipunctatus:19.0293,Notoscopelus_kroyeri:19.0293):1.8528):3.14205):7.23865,(Taaningichthys_bathyphilus:31.0369,Lampanyctodes_hectoris:31.0369):0.225932):17.256,(((Triphoturus_nigrescens:25.168,Triphoturus_mexicanus:25.168):16.3733,(Stenobrachius_leucopsarus:8.81125,(((Nannobrachium_ritteri:7.89692,(Lampanyctus_tenuiformis:0.381089,Lampanyctus_festivus:0.381089):7.51583):0.225653,Stenobrachius_nannochir:8.12257):0.256198,Nannobrachium_atrum:8.37877):0.432478):32.73):6.87769,((Lampichthys_procerus:41.4588,(Hygophum_hygomii:37.1123,(Notolychnus_valdiviae:35.1187,((((Hygophum_benoiti:9.0516,Hygophum_proximum:9.0516):7.35355,(Myctophum_punctatum:15.3291,Myctophum_asperum:15.3291):1.07605):2.83512,Protomyctophum_thompsoni:19.2403):6.71228,Benthosema_glaciale:25.9526):9.16613):1.99358):4.34656):1.67303,((Diaphus_dumerilii:29.1634,(Diaphus_mollis:24.4129,(Diaphus_watasei:16.0471,Diaphus_luetkeni:16.0471):8.36577):4.75051):1.80181,Diaphus_effulgens:30.9652):12.1667):5.28709):0.099897):0.147841,Gymnoscopelus_nicholsi:48.6667):10.6353):1.92322):13.2258,(Diaphus_theta:35.4166,(Diaphus_gigas:20.8121,Diaphus_perspicillatus:20.8121):14.6045):39.0344):30.8284,(Neoscopelus_macrolepidotus:22.1362,Scopelengys_tristis:22.1362):83.1432):46.5261,((((Synodus_ulae:85.086,(((Synodus_kaianus:37.7631,(Synodus_lacertinus:37.6649,Synodus_variegatus:37.6649):0.098249):17.612,((Trachinocephalus_myops:30.1019,(Synodus_lucioceps:29.0691,Synodus_foetens:29.0691):1.03278):6.52625,(Synodus_saurus:15.5615,Synodus_intermedius:15.5615):21.0667):18.747):16.9463,Synodus_hoshinonis:72.3215):12.7646):36.5374,Saurida_elongata:121.623):0.129152,(Harpadon_microchir:45.5311,(Saurida_undosquamis:30.1957,Saurida_wanieso:30.1957):15.3354):76.2215):2.54156,(((((Ahliesaurus_berryi:41.6737,(Scopelosaurus_harryi:18.6639,Scopelosaurus_lepidus:18.6639):23.0097):17.8037,((Benthalbella_dentata:21.624,Benthalbella_macropinna:21.624):18.32727,((Chlorophthalmus_agassizi:26.9742,((Chlorophthalmus_nigromarginatus:7.61872,Chlorophthalmus_acutifrons:7.61872):17.7596,Chlorophthalmus_albatrossis:25.3783):1.59592):10.8851,Parasudis_truculenta:37.8593):2.09193):19.5261):22.7188,((Lycengraulis_grossidens:24.886,Evermannella_indica:24.886):50.0782,((((Paralepis_coregonoides:39.0423,Macroparalepis_johnfitchi:39.0423):13.3883,Magnisudis_atlantica:52.4306):15.736203,((Lestidiops_jayakari_jayakari:35.0646,(Lestidium_atlanticum:20.7224,Lestrolepis_intermedia:20.7224):14.3421):14.3436,(Lestidiops_ringens:11.4252,Stemonosudis_macrura:11.4252):37.983):18.7587):2.1732,(Anotopterus_pharao:61.1992,(Omosudis_lowii:50.5213,(Alepisaurus_ferox:28.639,Alepisaurus_brevirostris:28.639):21.8823):10.6778):9.14091):4.62423):7.23178):17.8039,((Gigantura_chuni:33.4259,Gigantura_indica:33.4259):45.6792,(((Hime_japonica:40.574,Latropiscis_purpurissatus:40.574):13.962904,Bathysaurus_ferox:54.5369):19.2787,((Bathypterois_phenax:15.6224,Bathypterois_dubius:15.6224):11.4727,Bathypterois_grallator:27.0951):46.7205):5.28952):20.8949):18.5632,(Pseudotrichonotus_altivelis:98.121,Paraulopus_oblongus:98.121):20.4421):5.73099):27.5113):4.45793):22.3546,((((((Esox_masquinongy:33.0896,(Esox_lucius:11.5344,Esox_reichertii:11.5344):21.5552):13.2901,(Esox_americanus_vermiculatus:6.11721,(Esox_americanus_americanus:3.51527,Esox_niger:3.51527):2.60194):40.2625):38.6203,((Dallia_pectoralis:74.5831,(Umbra_krameri:23.674,(Umbra_limi:2.59707,Umbra_pygmaea:2.59707):21.0769):50.9091):10.2972,Novumbra_hubbsi:84.8803):0.119702):35.2832,(((Prosopium_cylindraceum:25.2854,Prosopium_coulterii:25.2854):13.481,((Stenodus_leucichthys:10.5179,((Coregonus_artedi:2.58048,Coregonus_autumnalis:2.58048):5.596,((((Coregonus_chadary:0.865561,Coregonus_ussuriensis:0.865561):3.32097,Coregonus_baicalensis:4.18653):0.494403,(Coregonus_nasus:4.48749,(Coregonus_clupeaformis:3.88758,(((Coregonus_albula:0.854128,Coregonus_lavaretus:0.854128):0.64666,((Coregonus_muksun:0.72018,Coregonus_widegreni:0.72018):0.354305,Coregonus_oxyrinchus:1.07449):0.426303):1.45541,Coregonus_baunti:2.9562):0.931387):0.599907):0.193443):2.08296,((Coregonus_peled:0.443679,Coregonus_sardinella:0.443679):6.17141,Coregonus_tugun_tugun:6.61509):0.148807):1.41259):2.34137):8.96261,Prosopium_williamsoni:19.4805):19.2859):16.1448,((Thymallus_thymallus:9.885,Thymallus_arcticus_arcticus:9.885):38.2337,((((Oncorhynchus_kisutch:6.65398,Oncorhynchus_tshawytscha:6.65398):4.34485,((Oncorhynchus_clarkii_clarkii:4.1893,Oncorhynchus_mykiss:4.1893):4.60983,(Oncorhynchus_nerka:7.55821,((Oncorhynchus_gorbuscha:2.82596,Oncorhynchus_keta:2.82596):3.50134,Oncorhynchus_masou_masou:6.3273):1.23092):1.24092):2.1997):9.51211,((Hucho_perryi:15.8657,(Salmo_labrax:5.80765,(((Salmo_platycephalus:0.547607,(Salmo_marmoratus:0.316997,Salmo_carpio:0.316997):0.23061):2.27174,Salmo_trutta_fario:2.81934):1.25628,(Salmo_salar:2.60055,((Salmo_obtusirostris:0.4457,Salmo_ohridanus:0.4457):2.02875,Salmo_trutta:2.47445):0.126101):1.47507):1.73203):10.0581):2.71582,(((Salvelinus_drjagini:6.34829,((((((Salvelinus_namaycush:3.02118,((Salvelinus_leucomaenis_pluvius:0.370899,Salvelinus_leucomaenis_leucomaenis:0.370899):0.119766,Salvelinus_leucomaenis_imbrius:0.490664):2.53052):0.901276,Salvelinus_malma_miyabei:3.92246):0.902118,((Salvelinus_boganidae:3.70642,Salvelinus_elgyticus:3.70642):0.347484,Salvelinus_taranetzi:4.0539):0.770677):0.642108,Salvelinus_neiva:5.46668):0.167368,((Salvelinus_kronocius:3.50595,Salvelinus_schmidti:3.50595):1.65926,Salvelinus_albus:5.16521):0.468843):0.187199,Salvelinus_malma_malma:5.82125):0.527035):0.809883,Salvelinus_alpinus_alpinus:7.15817):2.10121,Salvelinus_fontinalis:9.25938):9.32217):1.92939):3.60061,(Brachymystax_lenok:11.5224,(Hucho_bleekeri:2.67397,Hucho_hucho:2.67397):8.84841):12.5892):24.0071):6.79244):65.3721):38.761,((((Dolicholagus_longirostris:84.8765,Lipolagus_ochotensis:84.8765):7.14167,Nansenia_longicauda:92.0182):31.8432,(((Pseudobathylagus_milleri:12.1539,Bathylagus_euryops:12.1539):16.5374,(Leuroglossus_stilbius:10.8661,Bathylagoides_wesethi:10.8661):17.8251):5.54289,(Microstoma_microstoma:10.0759,Nansenia_candida:10.0759):24.1583):89.6273):0.138578,((Argentina_sialis:15.6775,Argentina_striata:15.6775):0.148196,(Argentina_sphyraena:12.9419,Argentina_silus:12.9419):2.88376):108.1743):35.0442):10.4138,(((((((Salangichthys_microdon:19.8526,((Salanx_cuvieri:3.70521,Hemisalanx_brachyrostralis:3.70521):11.989,(Salanx_reevesii:8.37398,Salanx_ariakensis:8.37398):7.32027):4.15839):9.13134,(Salangichthys_ishikawae:28.5029,Protosalanx_chinensis:28.5029):0.481081):14.9238,Plecoglossus_altivelis_altivelis:43.9078):15.0922,((Hypomesus_olidus:17.7557,((Hypomesus_pretiosus:11.1523,((Hypomesus_nipponensis:0.333723,Hypomesus_chishimaensis:0.333723):4.65116,Hypomesus_transpacificus:4.98489):6.16737):2.84381,Hypomesus_japonicus:13.9961):3.75967):8.91594,(((Mallotus_villosus:14.7611,Allosmerus_elongatus:14.7611):4.24304,(((Spirinchus_thaleichthys:3.84047,Spirinchus_starksi:3.84047):6.64886,Spirinchus_lanceolatus:10.4893):4.50781,Thaleichthys_pacificus:14.9971):4.00702):2.8051,(Osmerus_eperlanus:11.5323,(Osmerus_mordax_dentex:3.85119,Osmerus_mordax:3.85119):7.68116):10.2769):4.86241):32.3283):48.6821,(Prototroctes_maraena:44.0373,((Retropinna_semoni:6.78038,Retropinna_tasmanica:6.78038):15.9349,(Stokellia_anisodon:4.28967,Retropinna_retropinna:4.28967):18.4256):21.322):63.6449):29.8995,(((((Bonapartia_pedaliota:65.9744,Margrethia_obtusirostra:65.9744):26.8786,(((Gonostoma_elongatum:37.9301,Gonostoma_longipinnis:37.9301):21.8275,Sigmops_bathyphilus:59.7576):18.5094,(Cyclothone_acclinidens:46.8297,(Cyclothone_pseudopallida:28.1934,(Cyclothone_microdon:4.01818,Cyclothone_parapallida:4.01818):24.1752):18.6363):31.4374):14.586):5.03671,Diplophos_taenia:97.8897):3.88473,Triplophos_hemingi:101.774):5.14755,(((Chauliodus_danae:15.9735,Chauliodus_sloani:15.9735):66.742,((((((Trigonolampa_miriceps:39.7884,(((Thysanactis_dentex:28.9808,(Leptostomias_gladiator:18.8395,Leptostomias_longibarba:18.8395):10.1413):2.28383,(Odontostomias_micropogon:27.4052,Flagellostomias_boureei:27.4052):3.85942):5.34076,(((Idiacanthus_fasciola:32.6963,(Photonectes_braueri:25.639,Photonectes_margarita:25.639):7.05731):0.842061,(Tactostoma_macropus:33.0902,Echiostoma_barbatum:33.0902):0.448217):1.31026,((Photostomias_guernei:30.3197,((((Eustomias_jimcraddocki:4.07082,Eustomias_filifer:4.07082):12.1351,Eustomias_furcifer:16.2059):4.59142,(Melanostomias_bartonbeani:11.999,Eustomias_polyaster:11.999):8.79832):9.4593,(Malacosteus_niger:26.5759,(Pachystomias_microdon:22.8254,(Aristostomias_polydactylus:9.96942,(Aristostomias_tittmanni:5.1605,Aristostomias_scintillans:5.1605):4.80892):12.856):3.75055):3.68074):0.063036):0.740414,((Bathophilus_vaillanti:7.81382,Bathophilus_pawneei:7.81382):21.2932,Grammatostomias_flagellibarba:29.107):1.95315):3.78851):1.75673):3.18302):0.693194,Neonesthes_capensis:40.4816):1.33813,Chirostomias_pliopterus:41.8197):1.49858,Astronesthes_gemmifer:43.3183):8.93824,(Heterophotus_ophistoma:36.71,((Borostomias_elucens:23.7646,Stomias_boa:23.7646):2.10916,Rhadinesthes_decimus:25.8737):10.8362):15.5466):14.0561,(Idiacanthus_antrostomus:51.24,Stomias_atriventer:51.24):15.0727):16.4028):8.08912,(((Vinciguerria_poweriae:76.0577,(Polymetme_thaeocoryla:34.7845,Yarrella_blackfordi:34.7845):41.2731):11.1771,(Vinciguerria_nimbaria:77.771,(Ichthyococcus_ovatus:66.3126,Phosichthys_argenteus:66.3126):11.4584):9.4638):0.089819,(((((((Maurolicus_australis:10.5596,Maurolicus_muelleri:10.5596):28.8207,Argyropelecus_aculeatus:39.3803):7.96311,Argyropelecus_gigas:47.3434):11.6549,((Sternoptyx_obscura:0.53017,Sternoptyx_pseudobscura:0.53017):36.7268,Argyropelecus_sladeni:37.257):21.7413):16.3498,(Polyipnus_clarus:40.1242,Polyipnus_kiwiensis:40.1242):35.2238):10.1666,Valenciennellus_tripunctulatus:85.5146):1.71507,((Polyipnus_matsubarai:69.221,Argyropelecus_affinis:69.221):17.8916,Sternoptyx_pseudodiaphana:87.1125):0.117141):0.094916):3.48):16.1174):30.6596):15.0404,((((Neochanna_cleaveri:63.421,(((((Galaxias_argenteus:20.7555,Galaxias_fasciatus:20.7555):11.4627,((((Galaxias_paucispondylus:17.3671,Galaxias_fontanus:17.3671):0.12458,(((Galaxias_johnstoni:12.3938,(Galaxias_prognathus:10.8512,Galaxias_postvectis:10.8512):1.5426):1.18423,(Galaxias_brevipinnis:10.1621,((Galaxias_anomalus:7.06545,(Galaxias_gollumoides:5.72469,(Galaxias_depressiceps:3.80955,Galaxias_vulgaris:3.80955):1.91514):1.34076):1.52292,(Galaxias_eldoni:6.14076,Galaxias_pullus:6.14076):2.44761):1.57371):3.41594):2.67036,Galaxias_divergens:16.2484):1.24333):2.46385,Galaxias_cobitinis:19.9556):0.142093,Galaxias_neocaledonicus:20.0977):12.1205):6.17505,(Galaxias_auratus:2.75488,Galaxias_truttaceus:2.75488):35.6383):4.31821,((Paragalaxias_julianus:11.052,Paragalaxias_mesotes:11.052):24.8271,(Galaxias_olidus:32.004,(Lovettia_sealii:24.0714,(Neochanna_heleios:23.9443,Galaxias_parvus:23.9443):0.127083):7.93259):3.87512):6.83229):14.4912,(((Neochanna_burrowsius:26.2136,Neochanna_diversus:26.2136):20.7594,(((Brachygalaxias_bullocki:11.3229,Brachygalaxias_gothei:11.3229):25.0331,(Galaxiella_nigrostriata:16.9952,(Galaxiella_munda:14.1304,Galaxiella_pusilla:14.1304):2.86473):19.3608):7.30885,Neochanna_apoda:43.6648):3.30815):4.54337,Galaxias_zebratus:51.5163):5.6863):6.21841):27.847,Aplochiton_zebra:91.2681):0.19169,Lepidogalaxias_salamandroides:91.4598):32.3547,Galaxias_maculatus:123.814):28.8076):16.836):9.16):13.8599,(((Jenkinsia_lamprotaenia:67.5175,((Spratelloides_delicatulus:16.434,Spratelloides_robustus:16.434):35.1092,Spratelloides_gracilis:51.5432):15.9743):25.2987,((((((Sierrathrissa_leonensis:39.3911,(((((Limnothrissa_miodon:5.58075,Stolothrissa_tanganicae:5.58075):13.5287,Potamothrissa_obtusirostris:19.1095):5.76571,Microthrissa_royauxi:24.8752):2.88016,(Pellonula_leonensis:16.5088,(Odaxothrissa_vittata:0.919035,Pellonula_vorax:0.919035):15.5897):11.2466):2.51503,Microthrissa_congica:30.2704):9.1207):13.3595,(((((Ethmalosa_fimbriata:29.5567,(Sardinella_albella:21.7462,Sardinella_maderensis:21.7462):7.8105):0.127313,((Amblygaster_clupeoides:2.33082,Sardinella_aurita:2.33082):0.246121,(Sardinella_lemuru:2.4381,Sardinella_janeiro:2.4381):0.138843):27.107):12.1835,((Dorosoma_petenense:18.2977,Dorosoma_cepedianum:18.2977):18.1457,((Opisthonema_libertate:21.748131,Opisthonema_oglinum:21.7481):0.140027,Opisthonema_medirastre:21.8882):14.5552):5.42408):6.2085,((Nematalosa_erebi:35.5175,(Tenualosa_macrura:14.6985,Tenualosa_ilisha:14.6985):20.8189):10.5332,(Sardinella_zunasi:43.5558,((Clupanodon_thrissa:31.3805,Konosirus_punctatus:31.3805):11.055,(Sardinella_hualiensis:32.0883,Harengula_jaguana:32.0883):10.3472):1.12021):2.49492):2.02532):2.18457,Rhinosardinia_amazonica:50.2606):2.49006):9.29776,((Sardina_pilchardus:31.0562,Sardinops_sagax:31.0562):10.1128,(((Brevoortia_patronus:1.98819,Brevoortia_tyrannus:1.98819):12.1117,(((Alosa_fallax:1.43267,(((Alosa_immaculata:0.228997,Alosa_macedonica:0.228997):0.172042,Alosa_caspia_caspia:0.401039):0.711428,Alosa_alosa:1.11247):0.320205):1.94811,(Alosa_alabamae:0.335074,Alosa_sapidissima:0.335074):3.04571):7.67057,((Alosa_aestivalis:3.86842,Alosa_pseudoharengus:3.86842):2.71766,Alosa_mediocris:6.58608):4.46528):3.04855):0.965337,Alosa_chrysochloris:15.0652):26.1038):20.8793):5.24171,(Gilchristella_aestuaria:43.497,(Sauvagella_robusta:28.3017,Sauvagella_madagascariensis:28.3017):15.1953):23.7931):4.30078,((Ilisha_elongata:27.8908,(Pellona_castelnaeana:4.49316,Pellona_flavipinnis:4.49316):23.3976):40.2355,((Etrumeus_whiteheadi:19.0706,Etrumeus_teres:19.0706):45.1941,(Hyperlophus_translucidus:56.4515,(Clupea_harengus:35.0279,(Clupea_pallasii_pallasii:17.3515,Sprattus_sprattus:17.3515):17.6764):21.4236):7.81319):3.86152):3.46464):10.9053,((Setipinna_taty:35.501,(Coilia_grayii:5.33174,(Coilia_mystus:3.66446,(Coilia_brachygnathus:1.69446,Coilia_nasus:1.69446):1.97):1.66728):30.1693):13.4487,(((Anchoa_nasus:11.1951,Engraulis_anchoita:11.1951):22.2646,(((Anchoa_compressa:19.1959,Anchovia_clupeoides:19.1959):3.16173,(Cetengraulis_edentulus:18.6558,((Engraulis_japonicus:5.54309,(Engraulis_eurystole:2.28075,Engraulis_encrasicolus:2.28075):3.26235):10.7832,(Engraulis_australis:14.7612,(Cetengraulis_mysticetus:13.9542,(Anchoa_hepsetus:11.9944,(((Anchoa_choerostoma:6.21868,Anchoa_lyolepis:6.21868):1.32294,(Anchoa_delicatissima:5.12487,Anchoa_mitchilli:5.12487):2.41674):2.98032,Engraulis_mordax:10.5219):1.47245):1.95979):0.807021):1.56507):2.32955):3.70182):8.92571,(Anchoviella_lepidentostole:22.7746,Pterengraulis_atherinoides:22.7746):8.50875):2.17639):3.74098,Encrasicholina_heteroloba:37.2007):11.749):33.5464):10.3201):87.1035,((((Chanos_chanos:116.354,(Gonorynchus_abbreviatus:27.6563,(Gonorynchus_greyi:2.8031,Gonorynchus_forsteri:2.8031):24.8532):88.6974):30.4779,(((((((Brachyhypopomus_brevirostris:28.9677,(Brachyhypopomus_pinnicaudatus:26.1198,Brachyhypopomus_diazi:26.11977):2.84797):8.73741,Hypopomus_artedi:37.7052):0.145401,Microsternarchus_bilineatus:37.8506):28.6768,(Hypopygus_lepturus:32.98637,Steatogenys_elegans:32.9863):33.54102):29.1236,(Archolaemus_blax:90.20406,(((Apteronotus_leptorhynchus:23.6321,((Apteronotus_albifrons:16.2107,Parapteronotus_hasemani:16.2107):4.53571,(Orthosternarchus_tamandua:4.45578,Sternarchorhamphus_muelleri:4.45578):16.29058):2.88567):7.71951,Compsaraia_compsus:31.3516):51.2278,(Electrophorus_electricus:80.5967,(((Gymnotus_maculosus:17.1091,Gymnotus_jonasi:17.1091):12.372,((Gymnotus_coropinae:10.2944,Gymnotus_stenoleucus:10.2944):6.11212,(Gymnotus_coatesi:2.47195,Gymnotus_javari:2.47195):13.9345):13.0746):22.2045,(Gymnotus_pantherinus:35.5787,((((Gymnotus_varzea:10.5437,(Gymnotus_obscurus:7.38339,(Gymnotus_curupira:0.515031,Gymnotus_tigre:0.515031):6.86836):3.16027):4.66566,(Gymnotus_mamiraua:8.21611,(Gymnotus_arapaima:1.20964,(Gymnotus_carapo:1.01427,Gymnotus_ucamara:1.01427):0.195366):7.00647):6.99321):6.68879,Gymnotus_cylindricus:21.8981):11.2859,(Gymnotus_anguillaris:24.9893,(Gymnotus_cataniapo:23.4655,Gymnotus_pedanopterus:23.4655):1.5238):8.19467):2.3947):16.1069):28.9111):1.98276):7.62464):5.44694):16.2505,(((Nematogenys_inermis:93.7835,(Scoloplax_distolothrix:83.1357,((Pseudorinelepis_genibarbis:44.8971,((((Otocinclus_vestitus:23.9226,((Lampiella_gibbosa:8.54065,(Otocinclus_vittatus:5.43005,Hisonotus_leucofrenatus:5.43005):3.1106):14.9085,Oxyropsis_carinata:23.449161):0.473447):2.95437,(((((Neoplecostomus_franciscoensis:11.2074,(Neoplecostomus_espiritosantensis:9.40628,Neoplecostomus_microps:9.40628):1.80109):3.2489,(Neoplecostomus_corumba:9.1252,(Neoplecostomus_paranensis:7.27497,(Neoplecostomus_yapo:6.02968,Neoplecostomus_selenae:6.02968):1.24529):1.85023):5.33107):4.59603,Pseudotocinclus_juquiae:19.05232):0.09558,((Kronichthys_lacerta:6.05909,(Kronichthys_heylandi:4.12762,Kronichthys_subteres:4.12762):1.93147):9.05787,((((Isbrueckerichthys_calvus:1.9931,Isbrueckerichthys_duseni:1.9931):4.15731,Isbrueckerichthys_epakmos:6.15041):1.51326,Isbrueckerichthys_alipionis:7.66367):5.81352,((Pareiorhaphis_vestigipinnis:7.42172,(Pareiorhaphis_hystrix:6.03937,Pareiorhaphis_steindachneri:6.03937):1.38236):4.43717,Pareiorhaphis_splendens:11.8589):1.61829):1.63977):4.03094):2.89723,(Corumbataia_tocantinensis:5.78003,Corumbataia_cuestae:5.78003):16.2651):4.83187):6.35314,(((Leporacanthicus_heterodon:21.87414,(((Pterygoplichthys_joselimaianus:15.78994,((((Hypostomus_ancistroides:8.26599,Hypostomus_nigromaculatus:8.26599):2.13728,(Hypostomus_robinii:7.16995,(Hypostomus_hondae:3.3569,Hypostomus_plecostomoides:3.3569):3.81305):3.23332):1.59265,((Hemiancistrus_aspidolepis:2.43551,Hypostomus_panamensis:2.43551):4.17498,Hemiancistrus_maracaiboensis:6.61049):5.38543):1.65701,(Pterygoplichthys_zuliaensis:11.4796,((Squaliforma_emarginata:8.3349,Pterygoplichthys_scrophus:8.3349):0.72651,(Hypostomus_plecostomus:8.38754,(Parancistrus_aurantiacus:5.17908,Pterygoplichthys_multiradiatus:5.17908):3.20846):0.673871):2.41819):2.17334):2.13699):1.04904,((Squaliforma_squalina:9.66461,Squaliforma_villarsi:9.66461):4.40905,Aphanotorulus_ammophilus:14.07367):2.7653):4.09187,(Panaque_cochliodon:4.0734,Panaque_nigrolineatus:4.0734):16.8574):0.943303):3.07591,((Chaetostoma_anomalum:13.4951,Chaetostoma_lineopunctatum:13.4951):9.8885,(Leporacanthicus_triactis:16.0892,Acanthicus_adonis:16.0892):7.29444):1.56641):2.21329,(((Ancistrus_cirrhosus:11.8531,(Ancistrus_dolichopterus:7.66682,(Ancistrus_pirareta:5.99533,Ancistrus_ranunculus:5.99533):1.6715):4.18629):11.649,Dekeyseria_scaphirhyncha:23.5021):0.219337,Pseudolithoxus_dumus:23.7214):3.44189):6.0668):3.16992,((Hemiancistrus_hammarlundi:32.7262,(Harttia_guianensis:30.1109,(((Lamontichthys_stibaros:23.5319,(((((Farlowella_nattereri:6.00045,Farlowella_oxyrryncha:6.00045):8.05291,Farlowella_platorynchus:14.0534):0.899705,Sturisoma_festivum:14.9531):0.147588,(Sturisoma_nigrirostrum:5.40473,Sturisoma_monopelte:5.40473):9.69592):2.04314,Sturisomatichthys_citurensis:17.1438):6.38814):3.44927,(Dasyloricaria_filamentosa:22.5782,((Rineloricaria_fallax:17.775,Rineloricaria_uracantha:17.77508):2.32411,((Rineloricaria_platyura:12.7504,Rineloricaria_lanceolata:12.7504):4.17626,(((((Hemiodontichthys_acipenserinus:9.83084,Limatulichthys_griseus:9.83084):2.29966,(Loricariichthys_maculatus:7.53316,Loricariichthys_microdon:7.53316):4.59734):1.47984,(Loricaria_clavipinna:6.19109,(Loricaria_parnahybae:6.07179,Loricaria_simillima:6.07179):0.119304):7.41925):0.740879,Planiloricaria_cryptodon:14.3512):1.20173,(Dasyloricaria_tuyrensis:12.0886,Crossoloricaria_venezuelae:12.0886):3.46434):1.37374):3.17246):2.47908):4.40297):1.09012,Metaloricaria_paucidens:28.0713):2.0396):2.61533):1.75441,Hypostomus_affinis:34.4807):1.9194):8.49706):10.1094,((Lithogenes_villosus:43.3278,(Hemipsilichthys_gobio:12.3389,Hemipsilichthys_papillatus:12.3389):30.989):0.206704,(Delturus_parahybae:34.3021,Hemipsilichthys_nimius:34.3021):9.23241):11.472):28.12919):10.6478):2.08529,((Diplomystes_nahuelbutaensis:4.63231,Olivaichthys_mesembrinus:4.63231):87.4646,(((((Rita_rita:10.7193,Rita_gogra:10.7193):50.2839,((Plotosus_lineatus:34.663,(Neosilurus_hyrtlii:24.6287,Porochilus_rendahli:24.6287):10.0343):4.8332,Plotosus_canius:39.4962):21.507):4.52461,((((((((((Clarias_meladerma:8.28133,Clarias_nieuhofii:8.28133):4.51968,Clarias_intermedius:12.801):6.39758,(((Clarias_batrachus:11.1884,Clarias_fuscus:11.1884):2.04183,Clarias_dussumieri:13.2302):0.577123,Clarias_macrocephalus:13.8073):5.39129):6.39409,(((((Clarias_stappersii:7.55322,(Clarias_camerunensis:1.69517,(Clariallabes_longicauda:1.36625,Clarias_jaensis:1.36625):0.328919):5.85805):4.26646,(Clarias_gabonensis:6.61238,(Clarias_agboyiensis:0.71589,(Clarias_buthupogon:0.088769,Clarias_buettikoferi:0.088769):0.62712):5.89649):5.2073):3.40495,((Clarias_theodorae:11.0699,Clarias_werneri:11.0699):2.92836,(Channallabes_apus:3.27098,Gymnallabes_typus:3.27098):10.7273):1.22634):1.76181,(Clarias_ebriensis:3.15722,Clarias_pachynema:3.15722):13.8292):2.03346,((((Heterobranchus_isopterus:4.73917,Heterobranchus_longifilis:4.73917):5.45655,Heterobranchus_boulengeri:10.1957):2.01637,Heterobranchus_bidorsalis:12.2121):1.2403,(Dinotopterus_cunningtoni:12.675,((((Bathyclarias_nyasensis:0.716341,Bathyclarias_worthingtoni:0.716341):0.811168,(Bathyclarias_gigas:0.945949,Bathyclarias_ilesi:0.945949):0.58156):1.7065,(Clarias_gariepinus:0.512783,Clarias_anguillaris:0.512783):2.72122):3.32822,Clarias_ngamensis:6.56223):6.11277):0.777382):5.5675):6.5728):16.4129,(Heteropneustes_fossilis:0.18269,Heteropneustes_microps:0.18269):41.8229):19.2784,((((((Belonoglanis_tenuis:6.71986,Phractura_longicauda:6.71986):13.4631,Amphilius_rheophilus:20.183):0.121164,Amphilius_jacksonii:20.3042):18.1447,Amphilius_atesuensis:38.4489):6.88849,Amphilius_platychir:45.3374):13.3705,(((Malapterurus_beninensis:6.09636,Malapterurus_tanganyikaensis:6.09636):42.8178,Malapterurus_electricus:48.9142):0.163852,(((Atopochilus_savorgnani:12.4578,Euchilichthys_dybowskii:12.4578):26.6843,((Synodontis_sorex:11.0178,Synodontis_clarias:11.0178):6.009,((((((Synodontis_zambezensis:8.06857,(Synodontis_nigromaculata:2.52077,Synodontis_ngouniensis:2.52077):5.5478):1.13763,Synodontis_njassae:9.2062):1.26489,(((Synodontis_grandiops:0.281357,Synodontis_multipunctata:0.281357):4.23682,Synodontis_granulosa:4.51818):3.26609,(Synodontis_victoriae:6.25628,(Synodontis_tanganyicae:4.28257,((Synodontis_petricola:3.06953,Synodontis_polli:3.06953):0.303773,Synodontis_dhonti:3.3733):0.909268):1.97371):1.52799):2.68681):0.993493,(Synodontis_ocellifer:10.7246,Synodontis_courteti:10.7246):0.739928):2.6004,(Synodontis_filamentosa:11.5855,((Synodontis_thysi:7.62628,Synodontis_violacea:7.62628):2.19446,(Synodontis_serrata:8.46547,((Synodontis_frontosa:5.8444,Synodontis_punctulata:5.8444):1.97618,Synodontis_schall:7.82058):0.644889):1.35527):1.76478):2.47946):1.57848,(((Synodontis_batesii:11.11,((Synodontis_budgetti:4.11745,Synodontis_rebeli:4.11745):3.85421,(Synodontis_nigrita:6.60863,Synodontis_waterloti:6.60863):1.36303):3.13832):1.09962,((Synodontis_afrofischeri:2.74522,(Synodontis_unicolor:2.63628,Synodontis_greshoffi:2.63628):0.108936):8.60842,((Synodontis_contracta:8.01068,Synodontis_nigriventris:8.01068):2.5494,(Synodontis_steindachneri:8.94234,((Synodontis_angelica:6.78514,(Synodontis_congica:5.37692,Synodontis_pleurops:5.37692):1.40822):0.651188,(Synodontis_decora:6.7991,((Synodontis_soloni:5.39722,(Synodontis_leopardina:1.41532,(((Synodontis_thamalakanensis:0.720575,Synodontis_vanderwaali:0.720575):0.193108,Synodontis_nebulosa:0.913683):0.210992,(Synodontis_macrostigma:0.16094,Synodontis_woosnami:0.16094):0.963735):0.290641):3.9819):1.00725,(Synodontis_katangae:2.87433,Synodontis_brichardi:2.87433):3.53014):0.394638):0.637224):1.50601):1.61774):0.793566):0.855955):2.41952,(Synodontis_gambiensis:12.8179,(Synodontis_membranacea:11.124,Synodontis_batensoda:11.124):1.69395):1.81119):1.01433):1.38333):22.1153):1.16345,Chiloglanis_asymetricaudalis:40.3056):8.77248):9.62986):2.57606):1.09012,(((((((Pylodictis_olivaris:26.1863,(Noturus_exilis:16.7909,((((Noturus_gilberti:12.0798,Noturus_phaeus:12.0798):1.29388,(Noturus_flavus:11.6225,Noturus_insignis:11.6225):1.75111):0.622953,(((((Noturus_baileyi:4.43662,Noturus_hildebrandi_hildebrandi:4.43662):2.23416,((Noturus_crypticus:4.48226,Noturus_elegans:4.48226):0.703054,Noturus_stanauli:5.18531):1.48547):3.71546,Noturus_taylori:10.3862):0.713895,((Noturus_albater:1.12094,Noturus_maydeni:1.12094):8.91156,(Noturus_flavipinnis:8.69124,(Noturus_miurus:8.28206,((Noturus_flavater:4.2924,Noturus_furiosus:4.2924):1.60354,(Noturus_eleutherus:4.63284,(Noturus_placidus:3.2327,(Noturus_munitus:2.34371,(Noturus_stigmosus:0.866226,Noturus_gladiator:0.866226):1.47748):0.888991):1.40014):1.2631):2.38612):0.409183):1.34126):1.06764):2.29219,(Noturus_funebris:5.53499,Noturus_leptacanthus:5.53499):7.85734):0.604265):1.32466,(Noturus_nocturnus:12.6348,(Noturus_gyrinus:2.95963,Noturus_lachneri:2.95963):9.67514):2.68649):1.46963):9.39543):7.80827,(((Ictalurus_balsanus:11.8845,Ictalurus_furcatus:11.8845):9.25579,(Ictalurus_lupus:4.49544,Ictalurus_pricei:4.49544):16.6449):11.3621,(((((Ameiurus_serracanthus:7.21489,Ameiurus_brunneus:7.21489):1.33502,(Ameiurus_melas:2.21218,Ameiurus_nebulosus:2.21218):6.33774):6.29769,Ameiurus_natalis:14.8476):1.86637,(Ameiurus_catus:12.77,Ameiurus_platycephalus:12.77):3.94396):9.12047,Prietella_phreatophila:25.8344):6.66804):1.4921):16.4252,Ictalurus_punctatus:50.4198):4.58023,Prietella_lundbergi:55.0):2.5362,Cranoglanis_bouderius:57.5362):2.76747,(Gogo_arcuatus:39.9518,((((((Osteogeneiosus_militaris:14.8149,Arius_oetik:14.8149):6.16956,((((Hexanematichthys_sagor:15.8565,(Cephalocassis_melanochir:9.83677,Hemiarius_stormii:9.83677):6.01975):1.87219,(((((Arius_heudelotii:3.84252,Arius_latiscutatus:3.84252):5.637,Arius_parkii:9.47952):4.37127,(((Plicofollis_argyropleuron:6.75797,(Plicofollis_polystaphylodon:5.40388,(Plicofollis_dussumieri:2.50961,Plicofollis_nella:2.50961):2.89427):1.3541):3.26955,(Plicofollis_tenuispinis:4.68693,Plicofollis_tonggol:4.68693):5.3406):3.16295,(((Nedystoma_dayi:8.05312,(Cinetodus_crassilabris:6.00367,Nedystoma_novaeguineae:6.00367):2.04946):2.96145,Nemapteryx_armiger:11.0146):0.59633,(((Neoarius_berneyi:1.58927,Neoarius_graeffei:1.58927):8.29995,((Neoarius_midgleyi:8.68996,(Netuma_proxima:6.84929,Amissidens_hainesi:6.84929):1.84067):0.127333,Sciades_mastersi:8.81729):1.07193):1.12926,((((Neoarius_latirostris:8.753,(Cochlefelis_spatula:5.05279,Cochlefelis_danielsi:5.05279):3.7002):0.633968,(((Arius_macrorhynchus:6.17749,(Neoarius_velutinus:5.2737,Neoarius_coatesi:5.2737):0.903784):1.26864,(Cinetodus_carinatus:6.40341,(Neoarius_utarus:1.61602,(Brustiarius_solidus:0.418913,Brustiarius_nox:0.418913):1.19711):4.78739):1.04272):1.29974,(Cinetodus_froggatti:7.04962,Neoarius_leptaspis:7.04962):1.69625):0.6411):0.45102,Nemapteryx_augusta:9.83798):0.407261,Hemiarius_dioctes:10.2452):0.77324):0.592417):1.57958):0.660311):2.37614,Arius_madagascariensis:16.2269):1.16363,((Netuma_bilineata:10.223,Netuma_thalassina:10.223):6.70635,(((((Cathorops_multiradiatus:7.82192,(((((Cathorops_higuchii:1.69639,(Cathorops_fuerthii:0.797669,Cathorops_manglarensis:0.797669):0.898724):0.320579,Cathorops_mapale:2.01697):2.61505,(Cathorops_arenatus:1.50021,Cathorops_spixii:1.50021):3.13182):2.13862,(Cathorops_steindachneri:5.57964,(Cathorops_hypophthalmus:2.13059,Cathorops_tuyra:2.13059):3.44906):1.19101):0.555919,Cathorops_aguadulce:7.32657):0.495356):4.87025,Cathorops_dasycephalus:12.6922):2.1159,((((Notarius_lentiginosus:7.68392,Notarius_planiceps:7.68392):1.48201,(Notarius_armbrusteri:4.32396,Notarius_insculptus:4.32396):4.84197):0.474144,(Aspistor_luniscutis:0.26008,Aspistor_quadriscutis:0.26008):9.38):0.805453,(Sciades_troschelii:9.89481,((Notarius_biffi:8.42829,(Notarius_neogranatensis:1.49609,((Notarius_cookei:0.68012,Ariopsis_bonillai:0.68012):0.423757,Notarius_kessleri:1.10388):0.392214):6.9322):0.832405,(Notarius_grandicassis:6.71226,Amphiarius_rugispinis:6.71226):2.54843):0.634119):0.550716):4.36254):0.889392,((Sciades_platypogon:12.7381,(Genidens_genidens:1.68939,((Genidens_planifrons:0.085915,Genidens_machadoi:0.085915):0.089463,Genidens_barbus:0.175378):1.51401):11.0487):2.81407,((Bagre_marinus:8.01268,(Bagre_panamensis:6.91662,Bagre_bagre:6.91662):1.09605):1.79494,Bagre_pinnimaculatus:9.80762):5.74456):0.145277):0.513467,(((Potamarius_usumacintae:1.65356,(Potamarius_izabalensis:1.29503,Potamarius_nelsoni:1.29503):0.358524):9.15145,((Sciades_guatemalensis:5.70919,Sciades_seemanni:5.70919):2.71856,Ariopsis_felis:8.42774):2.37726):2.90251,(((Sciades_proops:6.06972,(Sciades_couma:4.2268,Sciades_passany:4.2268):1.84292):1.15171,Aspistor_parkeri:7.22143):2.49969,Sciades_dowii:9.72113):3.98639):2.50341):0.718397):0.461242):0.338155):1.33179,Hemiarius_sona:19.0605):1.03749,((Arius_leptonotacanthus:9.67217,Cephalocassis_borneensis:9.67217):2.61054,(Cryptarius_truncatus:11.0144,Arius_subrostratus:11.014382):1.2683):7.81529):0.886429):0.120872,(Nemapteryx_nenga:13.5882,(Arius_arius:11.3062,Arius_maculatus:11.3062):2.28197):7.51708):0.76045,Arius_gagora:21.8657):2.23999,(Galeichthys_peruvianus:3.63142,(Galeichthys_ater:1.11042,Galeichthys_feliceps:1.11042):2.521):20.4743):0.099315,Tachysurus_sinensis:24.2051):15.7467):20.3519):0.614837,(((Parauchenoglanis_monkei:28.6415,(Anaspidoglanis_macrostomus:10.0218,Parauchenoglanis_balayi:10.0218):18.61974):14.0093,(((Schilbe_mystus:12.7175,Schilbe_intermedius:12.7175):12.2062,Pareutropius_debauwi:24.9236):15.80866,(Lacantunia_enigmatica:34.9306,(Clarotes_laticeps:22.5486,(Lophiobagrus_brevispinis:5.82505,(Phyllonemus_typus:4.6377,Bathybagrus_tetranema:4.6377):1.18735):16.72359):12.382):5.80167):1.91853):12.0436,((Pangasianodon_gigas:17.4259,Pangasianodon_hypophthalmus:17.4259):9.78452,(((Pangasius_bocourti:13.4265,(Pangasius_sanitwongsei:9.8226,Pangasius_conchophilus:9.8226):3.60394):3.35561,(Pseudolais_pleurotaenia:10.4219,Pangasius_macronema:10.4219):6.36026):3.16059,((Helicophagus_typus:1.94583,(Helicophagus_leptorhynchus:1.68958,Helicophagus_waandersii:1.68958):0.256254):14.6942,Pangasius_larnaudii:16.64):3.30273):7.26768):27.484):6.22406):1.45557):0.459088,(((Rhamdia_laticauda:40.2905,(Rhamdia_quelen:37.2971,(Pimelodella_chagresi:37.1754,(((Imparfinis_cochabambae:10.7076,Imparfinis_stictonotus:10.7076):10.3991,Pimelodella_cristata:21.1068):2.39162,((Imparales_panamensis:12.0378,Imparfinis_lineatus:12.0378):10.14942,Goeldiella_eques:22.1872):1.31117):13.67699):0.121674):2.99342):16.03,(((Lophiosilurus_alexandri:20.1643,Cephalosilurus_apurensis:20.1643):12.8528,(((((Pseudopimelodus_mangurus:5.75957,Pseudopimelodus_bufonius:5.75957):3.91443,Pseudopimelodus_charus:9.674):8.29943,((Pseudopimelodus_pulcher:13.7774,Batrochoglanis_raninus:13.7774):2.50509,(Microglanis_leptostriatus:11.384,Batrochoglanis_villosus:11.384):4.89853):1.6909):6.61597,(Microglanis_cottoides:12.6458,Microglanis_garavelloi:12.6458):11.9436):3.42504,Microglanis_iheringi:28.0144):5.00267):11.6767,(((Conorhynchos_conirostris:26.6455,(Sorubim_lima:26.4026,Rhamdia_nicaraguensis:26.4026):0.242877):5.32953,(((Pimelodus_ornatus:23.6504,((Phractocephalus_hemioliopterus:15.0616,Parapimelodus_valenciennis:15.0616):2.68245,Pimelodus_albicans:17.744):5.90634):1.08428,(Cheirocerus_eques:21.0403,Pinirampus_pirinampu:21.0403):3.69433):5.37525,(((((Leiarius_pictus:11.3622,Perrunichthys_perruno:11.3622):7.97889,Leiarius_longibarbis:19.3411):5.57254,Steindachneridion_scriptum:24.9136):2.47826,((Zungaro_jahu:7.58668,Zungaro_zungaro:7.58668):15.3088,(Sorubimichthys_planiceps:19.0476,Brachyplatystoma_juruense:19.0476):3.84794):4.49634):1.93993,Platysilurus_malarmo:29.3318):0.778126):1.86511):0.119023,(Hypophthalmus_edentatus:11.5924,Hypophthalmus_marginatus:11.5924):20.5017):12.5998):11.6266):5.30481,(((((Ompok_bimaculatus:24.0108,(Wallago_leerii:23.151,(Ompok_miostoma:16.6381,Ompok_pabda:16.6381):6.51285):0.859856):6.56101,Ompok_pabo:30.5719):4.54096,(((Pterocryptis_cochinchinensis:29.172,Wallago_attu:29.172):3.23311,((Kryptopterus_cryptopterus:28.2942,(((Hemisilurus_moolenburghi:20.6481,(((((Kryptopterus_bicirrhis:0.537562,Kryptopterus_minor:0.537562):13.11,Kryptopterus_macrocephalus:13.6475):4.62123,(Phalacronotus_apogon:6.42145,Phalacronotus_bleekeri:6.42145):11.8473):1.12674,(Kryptopterus_limpok:17.195,Kryptopterus_schilbeides:17.195):2.20052):0.106566,Ompok_malabaricus:19.5021):1.14604):1.52972,(Ceratoglanis_scleronema:16.5159,Hemisilurus_mekongensis:16.5159):5.66193):1.52876,Belodontichthys_truncatus:23.7066):4.58764):2.1103,(Silurichthys_schneideri:24.3758,Pterocryptis_furnessi:24.3758):6.0287):2.0006):0.112915,Pterocryptis_anomala:32.518):2.59478):5.13667,(Silurus_glanis:18.5569,((Silurus_meridionalis:11.8603,Silurus_asotus:11.8603):4.14389,Silurus_microdorsalis:16.0042):2.55276):21.6926):16.2365,Olyra_longicaudata:56.4859):5.13935):1.20787):0.786975,(((Auchenipterus_demerarae:33.7151,(Epapterus_dispilurus:31.6758,(Trachelyopterus_galeatus:27.9033,((Ageneiosus_atronasus:13.6614,Ageneiosus_ucayalensis:13.6614):7.21377,Auchenipterichthys_thoracatus:20.87515):7.02809):3.77254):2.03934):3.50159,((Liosomadoras_morrowi:21.1257,Tatia_intermedia:21.1257):11.5103,Centromochlus_heckelii:32.636):4.58069):9.08992,(((Anadoras_grypus:27.851,((Hypodoras_forficulatus:17.0478,Physopyxis_lyra:17.0478):2.51762,(Amblydoras_monitor:11.9641,(Amblydoras_nauticus:3.32064,Amblydoras_affinis:3.32064):8.64342):7.60138):8.28559):15.7472,(Oxydoras_niger:33.3916,((((Rhinodoras_thomersoni:9.76567,Orinocodoras_eigenmanni:9.76567):0.780429,Rhinodoras_boehlkei:10.5461):14.3029,(Agamyxis_albomaculatus:7.08105,Agamyxis_pectinifrons:7.08105):17.768):4.31528,((Doraops_zuloagai:24.9233,Pterodoras_granulosus:24.9233):3.03511,((Platydoras_costatus:16.346,(Centrodoras_brachiatus:8.27947,(Lithodoras_dorsalis:3.89144,Megalodoras_uranoscopus:3.89144):4.38803):8.06652):10.0864,(((Doras_punctatus:13.1421,((Opsodoras_ternetzi:8.60661,(Nemadoras_hemipeltis:5.8769,Nemadoras_trimaculatus:5.8769):2.72971):2.88443,(Hemidoras_morrisi:9.03608,(Hemidoras_stenopeltis:5.59197,Opsodoras_stuebelii:5.59197):3.44411):2.45496):1.65104):4.15492,((Doras_carinatus:9.30066,Doras_micropoeus:9.30066):6.7755,(Trachydoras_microstomus:14.3205,(Trachydoras_nattereri:7.0897,Trachydoras_steindachneri:7.0897):7.23076):1.7557):1.22084):0.946343,((Leptodoras_praelongus:11.2082,Leptodoras_copei:11.2082):2.93362,(Leptodoras_linnelli:12.3637,(Anduzedoras_oxyrhynchus:10.5175,(Leptodoras_hasemani:9.54421,(Leptodoras_acipenserinus:6.58275,Leptodoras_juruensis:6.58275):2.96146):0.973339):1.84614):1.77808):4.10158):8.18904):1.52603):1.20587):4.22727):10.2066):1.16205,(Acanthodoras_spinosissimus:15.7152,Acanthodoras_cataphractus:15.7152):29.045):1.54638):17.3135):0.647911,((((((((Amblyceps_foratum:0.637093,Amblyceps_mangois:0.637093):17.2343,Amblyceps_mucronatum:17.8714):12.7064,(Amblyceps_serratum:22.7292,Amblyceps_apangi:22.7292):7.84859):13.4479,((((Liobagrus_reinii:5.73176,Liobagrus_mediadiposalis:5.73176):5.76162,(Liobagrus_obesus:7.3169,Liobagrus_andersoni:7.3169):4.17648):6.68086,(Liobagrus_anguillicauda:5.75121,(Liobagrus_styani:2.80605,(Liobagrus_marginatus:1.77804,(Liobagrus_marginatoides:0.738386,Liobagrus_kingi:0.738386):1.03966):1.028):2.94517):12.423):12.2147,(Xiurenbagrus_gigas:11.4678,Xiurenbagrus_xiurenensis:11.4678):18.9211):13.6367):0.104134,((Acrochordonichthys_rugosus:20.8892,Breitensteinia_cessator:20.8892):11.9859,(Akysis_brachybarbatus:25.9318,Akysis_prashadi:25.9318):6.94332):11.2547):1.99614,(((Pseudecheneis_sulcata:28.892,Glaridoglanis_andersonii:28.892):8.22874,((((Pareuchiloglanis_anteanalis:5.08903,Euchiloglanis_davidi:5.08903):6.66594,(Pareuchiloglanis_kamengensis:1.72791,Pseudexostoma_yunnanense:1.72791):10.0271):21.7808,Glyptosternon_maculatum:33.5358):1.62131,Exostoma_labiatum:35.1571):1.96365):3.7753,((Bagarius_bagarius:16.1733,Bagarius_yarrelli:16.1733):17.329,((Gagata_cenia:18.5178,Gogangra_viridescens:18.5178):12.82292,((Glyptothorax_fokiensis:5.67629,Glyptothorax_sinensis:5.67629):15.0829,((Glyptothorax_cavia:6.69593,Glyptothorax_garhwali:6.69593):11.592,((Glyptothorax_ngapang:10.249,(Glyptothorax_granulus:5.61468,Glyptothorax_ventrolineatus:5.61468):4.63434):3.40292,((Glyptothorax_annandalei:0.14674,Glyptothorax_davissinghi:0.14674):11.3002,((Glyptothorax_dakpathari:5.63193,Glyptothorax_brevipinnis:5.63193):1.79412,Glyptothorax_trilineatus:7.42605):4.02087):2.20502):4.63601):2.47129):10.5815):2.16161):7.39375):5.22986):9.45235,(((Batasio_batasio:24.2312,(Chandramara_chandramara:19.2328,(Batasio_tengana:0.183303,Batasio_tigrinus:0.183303):19.0495):4.99833):25.6647,(((Hemibagrus_guttatus:2.11663,Hemibagrus_macropterus:2.11663):39.1386,(((Mystus_bocourti:30.6726,(Mystus_tengara:30.6035,Mystus_cavasius:30.6035):0.069152):3.46173,((Mystus_vittatus:20.6799,Mystus_pulcher:20.6799):5.54573,Mystus_micracanthus:26.2257):7.9087):3.27932,(Mystus_oculatus:26.019,(((Sperata_seenghala:6.51716,Sperata_aor:6.51716):15.0662,Bagrus_docmak:21.5833):1.63748,(Mystus_leucophasis:19.2157,(Hemibagrus_nemurus:0.251032,Hemibagrus_wyckioides:0.251032):18.9647):4.00508):2.79823):11.3947):3.84153):4.62054,((((Pseudomystus_fuscus:18.994,Hyalobagrus_flavus:18.994):7.82916,(Pseudomystus_siamensis:21.4077,Pseudomystus_stenomus:21.4077):5.41554):3.78633,((Leiocassis_micropogon:5.68476,Leiocassis_poecilopterus:5.68476):15.1067,Bagrichthys_macropterus:20.7915):9.81806):5.56388,(((Pelteobagrus_argentivittatus:14.973,Coreobagrus_ichikawai:14.973):3.47929,(((Pelteobagrus_eupogon:8.12149,Pelteobagrus_fulvidraco:8.12149):1.79385,((Pseudobagrus_tokiensis:7.02231,(Coreobagrus_brevicorpus:6.22798,(Pseudobagrus_koreanus:5.27103,Pelteobagrus_nudiceps:5.27103):0.956944):0.794331):1.09946,(Pseudobagrus_aurantiacus:1.73692,Pseudobagrus_ondon:1.73692):6.38485):1.79357):7.71641,(Pseudobagrus_brevicaudatus:13.2344,(Pseudobagrus_pratti:11.6157,(Leiocassis_longirostris:2.76332,((Leiocassis_crassilabris:0.957852,Pseudobagrus_truncatus:0.957852):1.23157,(((Pelteobagrus_ussuriensis:0.527337,Pelteobagrus_vachellii:0.527337):0.335492,Pseudobagrus_nitidus:0.86283):0.987867,Pseudobagrus_tenuis:1.8507):0.338723):0.573898):8.85238):1.61874):4.39731):0.820538):2.57266,Pseudobagrus_kyphus:21.0249):15.1485):9.70234):4.02014):1.59162,(Pseudeutropius_brachypopterus:35.9358,Horabagrus_nigricollaris:35.9358):15.5517):4.09075):2.2767,((((Eutropiichthys_vacha:24.7,Neotropius_mitchelli:24.7):0.073953,Clupisoma_garua:24.774):7.30231,(Laides_hexanema:21.4428,Clupisoma_longianalis:21.4428):10.6334):0.145437,(Laides_longibarbis:23.7072,Ailia_coila:23.7072):8.51447):25.6333):6.41309):1.25976):5.23185,(((Hoplomyzon_sexpapilostoma:36.9903,Micromyzon_akamai:36.9903):14.4807,Bunocephalus_verrucosus:51.471):5.27873,(Cetopsis_coecutiens:23.6073,Cetopsis_candiru:23.6072):33.1424):14.0099):19.1737,(((((Corydoras_polystictus:15.389,(Corydoras_cruziensis:8.12461,(Corydoras_acrensis:5.0104,Corydoras_caudimaculatus:5.0104):3.11421):7.26438):19.9772,((Corydoras_weitzmani:14.4216,Corydoras_similis:14.4216):20.6594,((((Corydoras_oiapoquensis:14.9543,((Corydoras_multimaculatus:12.59,(((Corydoras_boesemani:9.82202,(Corydoras_schwartzi:7.43788,(Corydoras_kanei:6.34552,((Corydoras_paragua:4.6112,Corydoras_julii:4.6112):0.699466,Corydoras_punctatus:5.31067):1.03485):1.09236):2.38414):1.11437,(((Corydoras_brevirostris:2.67296,Corydoras_bicolor:2.67296):0.182669,Corydoras_arcuatus:2.85563):6.4058,Corydoras_araguaiaensis:9.26142):1.67497):0.669959,(Corydoras_leucomelas:7.89461,(Corydoras_copei:3.94674,Corydoras_trilineatus:3.94674):3.94787):3.71174):0.983619):0.198113,Corydoras_bondi:12.7881):2.16626):1.16228,(Corydoras_sterbai:8.85669,Corydoras_gossei:8.85669):7.25994):13.0432,((Corydoras_sipaliwini:9.11301,Corydoras_breei:9.11301):18.1086,(((((Corydoras_flaveolus:21.0918,(((Corydoras_tukano:4.43851,Corydoras_reynoldsi:4.43851):9.74755,(Corydoras_potaroensis:7.89823,Corydoras_albolineatus:7.89823):6.28783):2.54183,(Corydoras_diphyes:13.3191,(Corydoras_paleatus:3.79141,(Corydoras_nattereri:3.32997,Corydoras_ehrhardti:3.32997):0.461445):9.52773):3.40874):4.3639):1.22179,(((Corydoras_pygmaeus:16.9414,(Corydoras_hastatus:13.1781,Corydoras_guapore:13.1781):3.7633):2.22203,(Corydoras_gracilis:15.7606,(((Corydoras_bilineatus:1.70115,Corydoras_undulatus:1.70115):5.12176,((Corydoras_elegans:3.86238,(Corydoras_napoensis:2.28817,Corydoras_nijsseni:2.28817):1.5742):1.05447,Corydoras_nanus:4.91685):1.90606):6.62309,Aspidoras_pauciradiatus:13.446):2.31458):3.4029):1.10629,((((Corydoras_semiaquilus:5.49573,(Corydoras_coriatae:3.32582,Corydoras_fowleri:3.32582):2.16991):8.80886,(((Corydoras_kristinae:4.7216,Corydoras_pastazensis:4.7216):4.28612,(((((Corydoras_serratus:2.83347,(Corydoras_treitlii:1.64015,Corydoras_narcissus:1.64015):1.19332):0.975156,Corydoras_blochi:3.80862):0.541931,(Corydoras_vittatus:3.91951,(Corydoras_amapaensis:2.71747,(Corydoras_oxyrhynchus:1.33061,Corydoras_solox:1.33061):1.38686):1.20204):0.431047):1.33029,Corydoras_geoffroy:5.68084):2.16716,((Corydoras_septentrionalis:0.751964,Corydoras_stenocephalus:0.751964):4.98185,((Corydoras_cervinus:1.03595,Corydoras_acutus:1.03595):3.76167,(Corydoras_aurofrenatus:0.041076,Corydoras_ellisae:0.041076):4.75655):0.936182):2.11419):1.15972):1.19039,(Corydoras_maculifer:8.39811,Corydoras_simulatus:8.39811):1.80001):4.10648):5.05428,(((Scleromystax_barbatus:14.5956,Scleromystax_macropterus:14.5956):2.30863,Corydoras_lacerdai:16.9042):1.13968,Scleromystax_prionotos:18.0439):1.31496):0.345436,((Aspidoras_eurycephalus:9.00554,Aspidoras_poecilus:9.00554):1.56053,(Aspidoras_albater:9.12616,(((Aspidoras_fuscoguttatus:0.056424,Aspidoras_microgalaeus:0.056424):1.69937,Aspidoras_taurus:1.7558):3.74561,(Aspidoras_raimundi:4.12722,(Aspidoras_depinnai:2.51888,Aspidoras_spilotus:2.51888):1.60834):1.37418):3.62475):1.43991):9.13825):0.565453):2.04381):0.893601,((((Brochis_multiradiatus:7.25738,Brochis_britskii:7.25738):2.01283,Brochis_splendens:9.27021):10.6375,((Corydoras_filamentosus:14.2883,(Corydoras_difluviatilis:9.43924,Corydoras_garbei:9.43924):4.84904):3.54489,(((((Corydoras_virginiae:5.22196,((Corydoras_agassizii:4.068,(Corydoras_ambiacus:2.32004,(Corydoras_pulcher:1.81286,Corydoras_robustus:1.81286):0.507177):1.74796):0.740149,((Corydoras_melanistius:3.218,Corydoras_haraldschultzi:3.218):1.19565,Corydoras_gomezi:4.41366):0.394494):0.413813):0.843359,(Corydoras_ornatus:5.58766,(Corydoras_robineae:5.14793,(Corydoras_seussi:3.81307,Corydoras_ephippifer:3.81307):1.33486):0.439731):0.477663):3.57552,(Corydoras_leopardus:7.7977,(Corydoras_spilurus:4.08705,Corydoras_condiscipulus:4.08705):3.71066):1.84314):1.33634,((Corydoras_pantanalensis:5.84956,((Corydoras_sodalis:0.499393,Corydoras_reticulatus:0.499393):3.48226,Corydoras_geryi:3.98165):1.86791):3.7389,(Corydoras_crypticus:1.56374,Corydoras_imitator:1.56374):8.02472):1.38873):1.51359,Corydoras_delphax:12.4908):5.34239):2.07454):1.99957,((Corydoras_rabauti:14.717,(Corydoras_eques:12.8834,Corydoras_zygatus:12.8834):1.8336):3.17682,(Corydoras_aeneus:14.0902,Corydoras_melanotaenia:14.0902):3.80369):4.01342):1.29991):2.21102,((Corydoras_armatus:3.32926,Corydoras_atropersonatus:3.32926):20.6661,Corydoras_habrosus:23.9953):1.42286):1.32242,((Corydoras_coppenamensis:12.3422,Corydoras_griseus:12.3422):5.83367,Corydoras_guianensis:18.1759):8.56474):0.481012):1.93819):1.02623,(((Corydoras_melini:9.10594,Corydoras_loxozonus:9.10594):1.46104,Corydoras_loretoensis:10.567):0.597588,(((Corydoras_adolfoi:3.34592,Corydoras_duplicareus:3.34592):1.4239,(Corydoras_burgessi:1.14736,Corydoras_davidsandsi:1.14736):3.62246):4.54633,((Corydoras_metae:4.10055,(Corydoras_osteocarus:2.79582,Corydoras_axelrodi:2.79582):1.30473):3.48808,Corydoras_concolor:7.58863):1.72752):1.84842):19.0215):4.89499):0.285156):20.5846,(Hoplosternum_littorale:39.5609,((Lepthoplosternum_tordilho:10.5653,(Lepthoplosternum_altamazonicum:6.57024,Megalechis_thoracata:6.57024):3.99511):23.9266,(Callichthys_callichthys:34.4233,(Dianema_urostriatum:13.6212,Dianema_longibarbis:13.6212):20.8021):0.068631):5.06898):16.3899):2.31356,Corydoras_panda:58.2644):25.5764,((((Sarcoglanis_simplex:20.3984,Trichomycterus_guianense:20.3984):6.95179,(((Trichomycterus_areolatus:5.70745,Hatcheria_macraei:5.70745):3.3591,Bullockia_maldonadoi:9.06655):5.18483,Trichomycterus_corduvensis:14.2514):13.0988):29.4975,Haemomaster_venezuelae:56.8476):5.27318,(((Vandellia_cirrhosa:7.06864,Vandellia_sanguinea:7.06864):16.923201,Paravandellia_oxyptera:23.9919):27.4618,(((((Homodiaetus_anisitsi:15.5469,Megalocentor_echthrus:15.54692):5.83286,Pareiodon_microps:21.3798):5.35408,Acanthopoma_annectens:26.7339):0.206144,Pseudostegophilus_nemurus:26.94):2.80979,(Apomatoceros_alleni:19.6903,Henonemus_punctatus:19.6903):10.0595):21.7039):10.6671):21.72003):6.09251):2.16357):3.77193):9.69945,((((((Gnathocharax_steindachneri:62.468,(((((Exodon_paradoxus:44.3404,(Macropsobrycon_uruguayanae:6.79173,Compsura_heterura:6.79173):37.5486):5.33676,((Bryconadenos_tanaothoros:12.8377,Bryconamericus_stramineus:12.8377):26.35986,(((Piabina_argentea:8.1672,(Hemibrycon_beni:4.28647,(Bryconamericus_iheringii:2.00282,Odontostoechus_lethostigmus:2.00282):2.283654):3.88073):17.0624,(Bryconamericus_diaphanus:15.96896,Corynopoma_riisei:15.969):9.26062):9.08214,((Pseudocorynopoma_doriae:20.4992,((Brycon_chagrensis:12.3048,(Brycon_henni:12.2531,Brycon_petrosus:12.2531):0.051658):5.68082,Pseudocorynopoma_heterandria:17.9856):2.51354):6.54965,(((Cyanocharax_alegretensis:12.0013,((Cyanocharax_uruguayensis:4.87265,((Mimagoniates_inequalis:4.42564,(Lophiobrycon_weitzmani:4.31246,Mimagoniates_lateralis:4.31246):0.113184):0.172929,Mimagoniates_rheocharis:4.59857):0.274079):0.205583,Astyanax_alburnus:5.07824):6.92302):0.178914,Bryconamericus_patriciae:12.1802):0.350755,Mimagoniates_microlepis:12.5309):14.5179):7.26289):4.88582):10.4796):4.75712,((Tetragonopterus_chalceus:15.4036,Tetragonopterus_argenteus:15.4036):28.8368,((Galeocharax_knerii:26.2413,(Cynopotamus_argenteus:26.1533,Charax_leticiae:26.1533):0.088009):11.6997,Phenacogaster_calverti:37.9409):6.29948):10.1938):2.1848,(((((Gymnocorymbus_ternetzi:25.26,(Hyphessobrycon_uruguayensis:24.0561,((Inpaichthys_kerri:16.3331,Hemigrammus_rodwayi:16.3331):4.62232,Pristella_maxillaris:20.9555):3.1007):1.20385):5.09494,Poptella_compressa:30.3549):10.1289,(((Rachoviscus_crassiceps:8.24415,Rachoviscus_graciliceps:8.24415):30.474258,(Jupiaba_polylepis:35.3877,((((Moenkhausia_sanctaefilomenae:16.5965,Thayeria_boehlkei:16.5965):8.8271,((Hyphessobrycon_megalopterus:9.53293,Hyphessobrycon_erythrostigma:9.53293):3.2492,Hyphessobrycon_eques:12.7821):12.6415):2.62437,Ctenobrycon_hauxwellianus:28.048):4.39015,(Astyanax_scabripinnis:3.76094,Astyanax_cremnobates:3.76094):28.6772):2.94954):3.33075):0.129526,((Hemigrammus_bleheri:35.9863,(Astyanax_bimaculatus:24.0244,((((Astyanax_orthodus:2.62735,(Astyanax_nasutus:1.7206,Astyanax_nicaraguensis:1.7206):0.906753):0.730766,(Astyanax_aeneus:2.17943,(Astyanax_fasciatus:1.84455,Astyanax_mexicanus:1.84455):0.334886):1.17869):0.985015,Hyphessobrycon_anisitsi:4.34313):0.177389,Astyanax_jordani:4.52052):19.5038):11.962):1.54888,((Hyphessobrycon_herbertaxelrodi:17.5683,Macropsobrycon_xinguensis:17.5683):14.4179,(Pseudochalceus_kyburzi:14.6061,Nematobrycon_palmeri:14.6061):17.3802):5.54897):1.31274):1.63591):6.002191,(Hasemania_nana:25.5775,(Nematocharax_venustus:25.4589,Hemigrammus_erythrozonus:25.4589):0.118603):20.9086):0.096621,(Brittanichthys_axelrodi:33.4358,(Paracheirodon_innesi:5.60644,Paracheirodon_axelrodi:5.60644):27.8293):13.1469):10.0364):1.9135,((Acestrorhynchus_falcirostris:9.07537,Acestrorhynchus_nasutus:9.07537):24.4484,(Acestrorhynchus_heterolepis:27.9198,((Acestrorhynchus_britskii:17.202,Acestrorhynchus_microlepis:17.202):8.59992,(((Acestrorhynchus_falcatus:10.9728,Acestrorhynchus_lacustris:10.9728):2.14953,(Acestrorhynchus_altus:9.3811,Acestrorhynchus_pantaneiro:9.3811):3.74123):11.4986,(Acestrorhynchus_grandoculis:6.86079,Acestrorhynchus_minimus:6.86079):17.7601):1.18099):2.11794):5.604):25.0087):3.93547):0.079696,((Gasteropelecus_maculatus:40.4384,(Thoracocharax_stellatus:37.5392,(Gasteropelecus_sternicla:26.3724,(Carnegiella_marthae:6.79525,Carnegiella_strigata:6.79525):19.5771):11.1668):2.89919):18.8526,(Aphyocharax_anisitsi:51.715,(Triportheus_angulatus:19.9803,(Triportheus_orinocensis:9.06299,Triportheus_pantanensis:9.06299):10.9173):31.7347):7.57603):3.25667):3.5996,(Salminus_brasiliensis:24.2298,(Brycon_atrocaudatus:24.0934,((((Brycon_pesu:13.7221,Brycon_amazonicus:13.7221):2.7866,Brycon_hilarii:16.5087):4.94682,((Brycon_orbignyanus:12.0124,Brycon_orthotaenia:12.0124):5.42885,Brycon_moorei:17.4413):4.01425):0.091344,((Brycon_opalinus:12.5315,Brycon_nattereri:12.5315):0.109968,(Brycon_insignis:0.611771,Brycon_ferox:0.611771):12.0297):8.90534):2.54654):0.136442):41.9175):0.121382,(Chalceus_erythrurus:27.5577,Chalceus_macrolepidotus:27.5577):38.71103):15.2247,(((Prochilodus_nigricans:50.555,((Hydrolycus_scomberoides:17.3391,Rhaphiodon_vulpinus:17.3391):25.7532,((Anostomus_anostomus:35.40326,(((Leporinus_striatus:21.4277,((Leporinus_reinhardti:11.2413,(Leporinus_obtusidens:4.3632,(Leporinus_silvestrii:1.7441,Leporinus_elongatus:1.7441):2.6191):6.87808):5.40178,Leporinus_macrocephalus:16.6431):4.78468):1.24472,Leporinus_steindachneri:22.6725):4.03696,(((((Leporinus_paranensis:5.36135,Leporinus_octofasciatus:5.36135):1.84971,Leporinus_taeniatus:7.21107):5.09301,((Leporinus_friderici:3.57837,Leporinus_lacustris:3.57837):5.62594,Leporinus_piau:9.20431):3.09976):7.28831,Leporinus_fasciatus:19.5924):3.56038,(Leporinus_microphthalmus:18.068,Leporinus_amblyrhynchus:18.068):5.08479):3.55667):8.69384):2.59706,(Caenotropus_labyrinthicus:21.4394,Chilodus_punctatus:21.4394):16.5609):5.09196):7.46271):9.18978,(Hemiodus_gracilis:52.514,((Mylossoma_duriventre:17.4689,(Piaractus_brachypomus:1.6777,Piaractus_mesopotamicus:1.6777):15.7912):23.2827,(Iguanodectes_geisleri:33.9643,((((Metynnis_maculatus:0.859377,Pygocentrus_nattereri:0.859377):14.1819,((Serrasalmus_elongatus:7.54964,(Serrasalmus_serrulatus:7.40437,(((Serrasalmus_rhombeus:2.1528,Serrasalmus_compressus:2.1528):1.64315,Serrasalmus_hastatus:3.79595):1.85043,(Serrasalmus_altuvei:2.59136,Serrasalmus_brandtii:2.59136):3.05502):1.758):0.145266):7.11288,(Serrasalmus_geryi:14.3959,((Serrasalmus_irritans:6.55946,((Pygocentrus_cariba:5.69172,Serrasalmus_medinai:5.69172):0.354131,Serrasalmus_gouldingi:6.04585):0.513612):7.69217,((Catoprion_mento:6.6078,Pygopristis_denticulata:6.6078):3.68861,Pristobrycon_striolatus:10.2964):3.95523):0.144227):0.26666):0.378715):11.5661,(Metynnis_hypsauchen:16.9469,Pristobrycon_calmoni:16.9469):9.66043):0.16265,((((Acnodon_normani:11.8376,Acnodon_oligacanthus:11.8376):5.06801,Myloplus_planquettei:16.9056):3.58273,Mylesinus_schomburgkii:20.4884):2.15395,((Myloplus_rubripinnis:0.520951,Myleus_ternetzi:0.520951):11.5897,(Myleus_rhomboidalis:7.82557,(Mylesinus_paucisquamatus:5.78141,Ossubtus_xinguense:5.78141):2.04416):4.28512):10.5316):4.1277):7.19428):6.78732):11.7624):7.23078):13.7741,((Hepsetus_odoe:56.5609,(((Brycinus_macrolepidotus:28.6085,Brycinus_schoutedeni:28.6085):9.04355,((((((Brycinus_affinis:8.35236,(Brycinus_carolinae:2.849,Brycinus_imberi:2.849):5.50336):9.77981,Brycinus_opisthotaenia:18.1322):1.65893,((Brycinus_lateralis:12.2546,Brycinus_taeniurus:12.2546):5.19653,Brycinus_nurse:17.4511):2.33999):7.99456,Bryconaethiops_microstoma:27.7857):3.42336,(Brycinus_kingsleyae:29.7154,((Alestes_macrophthalmus:24.2528,Alestes_baremoze:24.2528):2.25465,((Hydrocynus_brevis:12.4878,(Hydrocynus_goliath:10.63,(Hydrocynus_forskahlii:0.936714,Hydrocynus_vittatus:0.936714):9.69329):1.85784):12.2878,(((Hemigrammopetersius_barnardi:4.10632,Rhabdalestes_maunensis:4.10632):11.2985,Ladigesia_roloffi:15.4048):0.728714,(Micralestes_acutidens:13.1016,Micralestes_occidentalis:13.1016):3.03189):8.64215):1.73172):3.20804):1.49356):2.61061,(Brycinus_longipinnis:25.9919,(((Alestopetersius_hilgendorfi:12.5412,((Phenacogrammus_interruptus:0.074136,Micralestes_pabrensis:0.074136):0.44923,Phenacogrammus_aurantiacus:0.523366):12.0178):6.36007,Bathyaethiops_breuseghemi:18.9013):2.19007,((Bryconaethiops_macrops:4.15407,Alestopetersius_caudalis:4.15407):10.9705,Phenacogrammus_ansorgii:15.1245):5.96681):4.90059):7.82769):3.83245):18.7681,Arnoldichthys_spilopterus:56.4201):0.14072):4.21527,((Characidium_fasciatum:31.0643,(Characidium_purpuratum:15.6118,Characidium_vidali:15.6118):15.4525):26.62515,((Nannostomus_beckfordi:13.9949,Nannostomus_espei:13.9949):31.0416,Ctenolucius_hujeta:45.0365):12.653):3.08666):12.74273):7.97452):20.9522,(((Hemistichodus_vaillanti:27.6175,Neolebias_powelli:27.6175):13.8234,(Neolebias_trilineatus:34.9249,(Xenocharax_spilurus:32.3642,((((Distichodus_lusosso:8.57961,Distichodus_sexfasciatus:8.57961):4.14967,Distichodus_fasciolatus:12.7293):13.0185,((Distichodus_hypostomatus:10.3263,Distichodus_notospilus:10.3263):9.63109,(Distichodus_affinis:14.006,Distichodus_decemmaculatus:14.006):5.95137):5.7904):3.34873,((Nannocharax_macropterus:20.8358,Hemigrammocharax_multifasciatus:20.8358):0.047693,Hemigrammocharax_machadoi:20.8835):8.21301):3.26766):2.5607):6.516):11.5997,Neolebias_ansorgii:53.0406):49.404966):3.12269):6.33325):20.0671,((Psilorhynchus_balitora:85.2073,((((Leptobarbus_hosii:23.4607,Leptobarbus_hoevenii:23.4607):37.4705,(((((Macrochirichthys_macrochirus:23.1855,((Parachela_siamensis:15.1859,Parachela_williaminae:15.1859):1.67736,(Parachela_maculicauda:3.49777,Parachela_oxygastroides:3.49777):13.3655):6.32219):5.40444,(Aphyocypris_chinensis:18.4005,(Pararasbora_moltrechti:12.2916,(Nicholsicypris_normalis:7.25242,Yaoshanicus_arcus:7.25242):5.03918):6.10889):10.1894):3.40776,(((Metzia_formosae:16.6263,(Metzia_lineata:12.4946,Hemigrammocypris_rasborella:12.4946):4.13174):11.2013,(((Elopichthys_bambusa:17.6295,(Luciobrama_macrocephalus:16.9173,Squaliobarbus_curriculus:16.9173):0.712152):2.1639,(Ctenopharyngodon_idella:17.393,(Mylopharyngodon_piceus:12.912,Ochetobius_elongatus:12.912):4.48098):2.40037):1.9512,((Hypophthalmichthys_nobilis:10.7517,Hypophthalmichthys_molitrix:10.7517):8.95881,(Culter_oxycephaloides:17.8901,((Xenocypris_yunnanensis:13.0184,Xenocyprioides_parvulus:13.0184):4.10323,((((((Hemiculter_bleekeri:3.0291,Hemiculter_leucisculus:3.0291):0.12666,Toxabramis_houdemeri:3.15576):5.50201,Hemiculterella_macrolepis:8.65777):3.77786,Ischikauia_steenackeri:12.4356):1.07404,(((Pseudolaubuca_sinensis:9.66553,(Parabramis_pekinensis:9.42544,(Xenocyprioides_carinatus:5.14097,(Megalobrama_amblycephala:1.20262,Megalobrama_pellegrini:1.20262):3.93836):4.28446):0.240089):0.769707,Megalobrama_skolkovii:10.4352):1.83927,((Chanodichthys_erythropterus:7.03001,Ancherythroculter_daovantieni:7.03001):2.40664,(Chanodichthys_mongolicus:6.75379,Culter_alburnus:6.75379):2.68286):2.83785):1.23517):2.48635,((Hemiculter_lucidus:13.4891,(((Rhodeus_fangi:0.781322,Rhodeus_ocellatus_ocellatus:0.781322):7.78183,(Acanthorhodeus_chankaensis:7.68353,(Leuciscus_leuciscus:5.06783,(Gobiobotia_longibarba:2.74841,(Gobiobotia_homalopteroidea:1.77053,Gobiobotia_abbreviata:1.77053):0.977882):2.31942):2.61569):0.879624):3.91679,(Xenocypris_hupeinensis:11.127,(Plagiognathops_microlepis:5.4414,Xenocypris_fangi:5.4414):5.68561):1.35294):1.00915):0.801349,(Pseudobrama_simoni:11.9945,Distoechodon_tumirostris:11.9945):2.29593):1.70558):1.12558):0.768531):1.82034):2.03408):6.08306):1.7025,Paralaubuca_typus:29.5301):2.46754):3.59164,((((Nipponocypris_sieboldii:14.9769,Nipponocypris_temminckii:14.9769):4.86039,Candidia_barbata:19.8373):1.79977,Parazacco_spilurus:21.6371):2.85638,((Opsariichthys_bidens:4.69972,Opsariichthys_uncirostris:4.69972):8.90746,Opsariichthys_pachycephalus:13.60721):10.8863):11.0959):11.9496,((((((Acheilognathus_tabira_tabira:17.3076,(((Acheilognathus_cyanostigma:14.8795,((Acheilognathus_tonkinensis:4.28672,Acheilognathus_rhombeus:4.28672):7.85318,(((Acheilognathus_longipinnis:3.76194,Acheilognathus_barbatulus:3.76194):4.77992,Acheilognathus_typus:8.54186):0.07309,(Acanthorhodeus_macropterus:6.33528,Acheilognathus_longibarbatus:6.33528):2.27966):3.52495):2.73958):0.907842,Acheilognathus_imberbis:15.7873):1.38529,Acheilognathus_yamatsutae:17.1726):0.134984):3.97083,Acheilognathus_melanogaster:21.2784):5.84925,((Tanakia_lanceolata:18.6894,(Acheilognathus_signifer:13.1538,Tanakia_limbata:13.1538):5.53563):4.53404,((Tanakia_tanago:19.3453,Paracheilognathus_himantegus:19.3453):0.928121,((Rhodeus_sericeus:1.69487,(Rhodeus_amarus:1.07829,Rhodeus_colchicus:1.07829):0.616577):15.3904,((Rhodeus_amurensis:0.900291,Rhodeus_lighti:0.900291):13.1838,Rhodeus_atremius:14.0841):3.00124):3.18813):2.94998):3.90424):15.716,(((((((Sarcocheilichthys_kiangsiensis:12.204,(Sarcocheilichthys_czerskii:4.9036,Sarcocheilichthys_nigripinnis_nigripinnis:4.9036):7.30038):9.72691,((Sarcocheilichthys_lacustris:2.07562,(Sarcocheilichthys_sinensis_fukiensis:0.654155,Sarcocheilichthys_sinensis_sinensis:0.654155):1.42147):15.2168,(Sarcocheilichthys_parvus:11.6896,Sarcocheilichthys_variegatus_microoculus:11.6896):5.60281):4.63847):5.50176,Gnathopogon_elongatus:27.4327):3.72758,((Squalidus_chankaensis_chankaensis:28.5258,((Paracanthobrama_guichenoti:23.148,(Rhinogobio_hunanensis:10.7402,(Rhinogobio_cylindricus:7.04453,Rhinogobio_typus:7.04453):3.69562):12.4079):5.27678,((Pseudorasbora_parva:11.6473,Pseudorasbora_pumila:11.6473):11.2491,(Pseudorasbora_elongata:20.4106,Pungtungia_herzi:20.4106):2.48579):5.52841):0.100992):1.27367,((Gobiocypris_rarus:16.3336,(Gnathopogon_imberbis:12.9805,((Gnathopogon_herzensteini:10.3215,Gnathopogon_strigatus:10.3215):1.10794,Gnathopogon_nicholsi:11.4294):1.55113):3.35303):8.87159,Coreoleuciscus_splendidus:25.2052):4.59431):1.36076):3.083,((((((Gobio_cynocephalus:8.1286,(Mesogobio_tumenensis:7.34782,(Gobio_coriparoides:6.19253,((Romanogobio_tenuicorpus:3.03435,Acanthogobio_guentheri:3.03435):2.22343,Gobio_soldatovi:5.25778):0.934751):1.15529):0.78078):1.48554,Gobio_huanghensis:9.61414):3.74484,Gobio_gobio:13.359):9.98325,(((Gobio_banarescui:5.66973,Romanogobio_uranoscopus:5.66973):5.68452,(Romanogobio_ciscaucasicus:6.60092,Romanogobio_macropterus:6.60092):4.75334):8.25988,(Romanogobio_benacensis:17.0892,Romanogobio_kesslerii:17.0892):2.52499):3.7281):7.3036,(((((Microphysogobio_chinssuensis:10.8347,Rostrogobio_liaohensis:10.8347):5.84738,(Microphysogobio_fukiensis:6.51366,(Microphysogobio_elongatus:5.87626,Microphysogobio_tungtingensis:5.87626):0.637398):10.1684):3.29919,(Platysmacheilus_longibarbatus:12.9587,Platysmacheilus_exiguus:12.9587):7.02252):5.71425,(Pseudogobio_guilinensis:13.8594,Pseudogobio_vaillanti:13.8594):11.836):2.05527,(((Saurogobio_xiangjiangensis:0.933744,Saurogobio_gracilicaudatus:0.933744):17.4579,(Saurogobio_gymnocheilus:11.171,Saurogobio_dabryi:11.171):7.22062):8.94895,(Abbottina_liaoningensis:19.8384,Abbottina_rivularis:19.8384):7.50221):0.410161):2.89509):2.33889,(Gobiobotia_filifer:26.8434,Xenophysogobio_boulengeri:26.8434):6.14132):1.2585):0.475798,(Coreius_guichenoti:17.1797,Coreius_heterodon:17.1797):17.5393):3.17905,(((Hemibarbus_longirostris:21.8488,Hemibarbus_mylodon:21.8488):4.31098,(Hemibarbus_maculatus:6.39889,((Hemibarbus_medius:1.23259,Hemibarbus_labeo:1.23259):3.24473,(Hemibarbus_umbrifer:2.74897,Belligobio_nummifer:2.74897):1.72835):1.92157):19.7609):8.10189,((Squalidus_atromaculatus:14.0272,(Squalidus_argentatus:0.436529,Squalidus_nitens:0.436529):13.5907):12.4439,Capoeta_capoeta_gracilis:26.4711):7.7905):3.63644):4.94559):2.35107,((Tanichthys_albonubes:9.72451,Tanichthys_micagemmae:9.72451):29.2906,Tinca_tinca:39.0151):6.17962):1.30066,((((((((Chrosomus_oreas:7.28306,Chrosomus_tennesseensis:7.28306):5.04448,(Chrosomus_cumberlandensis:8.45941,Phoxinus_saylori:8.45941):3.86813):2.53808,(Chrosomus_eos:10.6376,Chrosomus_erythrogaster:10.6376):4.22804):1.72949,Phoxinus_neogaeus:16.5951):8.79095,((Lavinia_exilicauda:14.8045,(((Ptychocheilus_grandis:9.11211,Eremichthys_acros:9.11211):1.55647,(((Ptychocheilus_umpquae:6.03832,Ptychocheilus_oregonensis:6.03832):3.9226,(Mylopharodon_conocephalus:7.82995,Gila_bicolor:7.82995):2.13096):0.384003,(Gila_alvordensis:0.288227,Gila_boraxobius:0.288227):10.0567):0.323663):0.871103,(((Gila_coerulea:7.69092,(Acrocheilus_alutaceus:7.51678,(((Ptychocheilus_lucius:5.9395,Gila_robusta:5.9395):0.548388,((((Gila_nigra:0.220666,Gila_nigrescens:0.220666):1.52901,Gila_pandora:1.74968):0.649864,Gila_conspersa:2.39954):2.75555,(Gila_atraria:1.84195,Gila_cypha:1.84195):3.31314):1.3328):0.65555,(Gila_ditaenia:6.38275,Gila_orcuttii:6.38275):0.760683):0.373341):0.174144):0.967629,Moapa_coriacea:8.65855):1.36277,(Hesperoleucus_symmetricus:4.19599,Relictus_solitarius:4.19599):5.82533):1.51836):3.26479):4.26526,Orthodon_microlepidotus:19.0697):6.31632):6.22212,(((Phoxinus_semotilus:11.5182,((Rhynchocypris_czekanowskii:1.83649,Rhynchocypris_percnurus:1.83649):6.15533,(Rhynchocypris_oxycephalus:5.17782,Rhynchocypris_lagowskii:5.17782):2.814):3.52633):6.06038,(Phoxinus_kumgangensis:17.432,(Tribolodon_hakonensis:9.9344,(Tribolodon_sachalinensis:8.09859,(Tribolodon_brandtii:5.06027,Tribolodon_nakamurai:5.06027):3.03833):1.8358):7.49764):0.146503):10.7883,((Couesius_plumbeus:17.499,Margariscus_margarita:17.499):5.27006,((Hemitremia_flammea:15.1232,(Semotilus_thoreauianus:8.43692,Semotilus_atromaculatus:8.43692):6.68625):6.73582,((Plagopterus_argentissimus:8.70613,Meda_fulgida:8.70613):6.05046,(((Lepidomeda_albivallis:0.778899,Lepidomeda_mollispinis:0.778899):9.89449,Lepidomeda_vittata:10.6734):0.658053,Snyderichthys_copei:11.3314):3.42515):7.1024):0.910095):5.5977):3.24139):4.40099,(Pelecus_cultratus:29.8443,(((((Leuciscus_waleckii:10.1264,Aspius_aspius:10.1264):3.87809,Aspius_vorax:14.0044):0.727511,((Leuciscus_latus:0.791479,Leuciscus_schmidti:0.791479):10.1589,Leuciscus_idus:10.9503):3.78161):10.1978,(Notemigonus_crysoleucas:24.0016,((Alburnoides_bipunctatus:19.4752,(((Phoxinellus_dalmaticus:7.32673,(Phoxinellus_pseudalepidotus:6.34319,Phoxinellus_alepidotus:6.34319):0.983536):5.80591,((((Achondrostoma_occidentale:3.16629,(Achondrostoma_arcasii:0.750021,Achondrostoma_oligolepis:0.750021):2.41627):5.80307,((Pseudochondrostoma_willkommii:5.06666,Pseudochondrostoma_polylepis:5.06666):0.352207,Pseudochondrostoma_duriense:5.41887):3.55049):1.24529,(Chondrostoma_olisiponensis:7.95688,(Iberochondrostoma_lusitanicum:5.68588,((Iberochondrostoma_lemmingii:3.04517,Iberochondrostoma_oretanum:3.04517):2.06861,Iberochondrostoma_almacai:5.11378):0.572105):2.27099):2.25777):0.759379,(((Parachondrostoma_toxostoma:3.64445,(Parachondrostoma_miegii:2.38135,(Parachondrostoma_turiense:1.36418,Parachondrostoma_arrigonis:1.36418):1.01717):1.2631):5.49032,(Chondrostoma_regium:5.26016,(Chondrostoma_oxyrhynchum:3.78606,((Chondrostoma_prespense:1.96197,Chondrostoma_vardarense:1.96197):0.989761,(Chondrostoma_holmwoodii:2.00911,(Chondrostoma_nasus:1.90677,Chondrostoma_angorense:1.90677):0.102333):0.942626):0.834333):1.47409):3.87461):0.782645,(Protochondrostoma_genei:8.51094,(Chondrostoma_phoxinus:4.10315,(Chondrostoma_knerii:0.709645,Chondrostoma_soetta:0.709645):3.39351):4.40779):1.40648):1.05661):2.15861):1.59101,((Telestes_croaticus:12.3296,(((Pseudophoxinus_kervillei:1.67451,Pseudophoxinus_zekayi:1.67451):6.31144,Pseudophoxinus_zeregi:7.98595):3.65003,(((Pseudophoxinus_crassus:5.52075,(Pseudophoxinus_battalgilae:3.59646,Pseudophoxinus_handlirschi:3.59646):1.9243):2.40315,((Pseudophoxinus_alii:1.332,Pseudophoxinus_antalyae:1.332):5.1374,(Chondrostoma_fahirae:5.57944,(Pseudophoxinus_maeandri:0.782695,Pseudophoxinus_ninae:0.782695):4.79675):0.88996):1.4545):2.54962,Pseudophoxinus_anatolicus:10.4735):1.16246):0.693654):0.533264,((Telestes_polylepis:9.85259,((Telestes_turskyi:5.82542,Telestes_ukliva:5.82542):3.64783,(Telestes_muticellus:8.6366,Telestes_montenigrinus:8.6366):0.836646):0.379346):1.69962,(Telestes_metohiensis:10.8506,(Telestes_souffia:9.16853,(Telestes_beoticus:6.83285,Telestes_pleurobipunctatus:6.83285):2.33568):1.68212):0.701564):1.31069):1.86075):4.75156):2.52507,((((Ballerus_ballerus:8.35004,Ballerus_sapa:8.35004):7.17651,((((Vimba_elongata:3.93492,(Acanthobrama_mirabilis:2.06519,Vimba_melanops:2.06519):1.86973):3.83581,((((Acanthalburnus_microlepis:3.7541,Acanthobrama_marmid:3.7541):0.657599,Petroleuciscus_persidis:4.4117):0.587361,Acanthobrama_lissneri:4.99906):1.31458,Vimba_vimba:6.31363):1.4571):3.93794,(Abramis_brama:3.85812,Blicca_bjoerkna:3.85812):7.85056):1.39803,Acanthobrama_terraesanctae:13.1067):2.41985):4.37348,((((Petroleuciscus_borysthenicus:7.20531,Squalius_aphipsi:7.20531):8.35367,(((((Squalius_aradensis:4.20978,Squalius_torgalensis:4.20978):4.99589,(((Squalius_castellanus:2.84173,Squalius_carolitertii:2.84173):0.718653,((Iberocypris_palaciosi:2.80622,Squalius_valentinus:2.80622):0.34213,Squalius_pyrenaicus:3.14835):0.412031):2.98222,Squalius_malacitanus:6.5426):2.66306):2.1058,((Squalius_microlepis:3.91464,(Squalius_lucumonis:3.67813,Scardinius_erythrophthalmus:3.67813):0.23651):4.05434,(Squalius_svallize:4.51797,Squalius_illyricus:4.51797):3.45101):3.34249):0.712079,(Ladigesocypris_ghigii:9.97637,Squalius_keadicus:9.97637):2.04718):1.2705,((Squalius_cephalus:8.47806,(Squalius_laietanus:7.733,(Squalius_peloponensis:4.60637,Squalius_zrmanjae:4.60637):3.12663):0.74506):1.74911,Squalius_lepidus:10.2272):3.06688):2.26493):2.59398,(((Pseudophoxinus_callensis:8.42999,(Tropidophoxinellus_spartiaticus:4.64471,Tropidophoxinellus_alburnoides:4.64471):3.78528):7.23902,((Alburnus_baliki:10.509,(Alburnus_mossulensis:7.2056,Alburnus_orontis:7.2056):3.30343):1.52011,(Anaecypris_hispanica:10.6831,((Pseudophoxinus_punicus:9.25721,Leucaspius_delineatus:9.25721):1.03457,((Alburnus_escherichii:4.09476,((Alburnus_scoranza:3.02713,((Alburnus_albidus:0.93731,Alburnus_arborella:0.93731):1.02065,Alburnus_neretvae:1.95796):1.06917):0.459033,Alburnus_alburnus:3.48616):0.6086):4.62138,(Alburnus_filippii:3.30856,Alburnus_chalcoides:3.30856):5.40757):1.57564):0.391301):1.34606):3.63988):0.780701,((Scardinius_scardafa:4.8595,Scardinius_acarnanicus:4.8595):0.099078,Scardinius_graecus:4.95858):11.4911):1.70325):0.977607,(((((Rutilus_ylikiensis:3.46489,Rutilus_panosi:3.46489):2.72302,(Rutilus_aula:3.56077,(Rutilus_basak:1.88091,Rutilus_prespensis:1.88091):1.67986):2.62713):0.549436,Rutilus_pigus:6.73734):2.10755,(Rutilus_frisii:0.409583,Rutilus_rutilus:0.409583):8.4353):3.17981,Rutilus_rubilio:12.0247):7.10587):0.769462):0.129583,Alburnus_tarichi:20.0296):1.97066):2.00133):0.928164):0.981382,((Pseudophoxinus_egridiri:20.2466,(((Delminichthys_adspersus:4.19097,Delminichthys_ghetaldii:4.19097):1.09159,(Delminichthys_jadovensis:2.0776,Delminichthys_krbavensis:2.0776):3.20496):9.96834,((((Pelasgus_stymphalicus:3.45747,Pelasgus_marathonicus:3.45747):4.45791,Pelasgus_prespensis:7.91538):0.90741,Pelasgus_laconicus:8.82279):1.21001,Pelasgus_minutus:10.0328):5.21811):4.99572):3.88341,(Pachychilon_pictum:8.92662,Pachychilon_macedonicum:8.92662):15.2034):1.78111):3.93319):6.16483):1.3875,((Phoxinus_bigerri:7.93162,Phoxinus_phoxinus:7.93162):28.3972,((((((Campostoma_ornatum:8.63913,((Campostoma_anomalum:1.43599,Campostoma_pauciradii:1.43599):6.47567,Campostoma_pullum:7.91165):0.727481):2.07629,Campostoma_oligolepis:10.7154):15.761,((Nocomis_micropogon:7.38017,(Nocomis_leptocephalus:5.66002,Nocomis_raneyi:5.66002):1.72014):11.4688,(Nocomis_asper:4.32916,Nocomis_biguttatus:4.32916):14.5198):7.62741):3.14645,((Exoglossum_maxillingua:7.48867,Exoglossum_laurae:7.48867):13.5511,(Rhinichthys_cobitis:16.5021,((Oregonichthys_crameri:1.31605,Oregonichthys_kalawatseti:1.31605):13.5092,((Rhinichthys_obtusus:0.117226,Rhinichthys_atratulus:0.117226):13.2498,((Rhinichthys_cataractae:4.05546,Rhinichthys_evermanni:4.05546):7.24823,(Rhinichthys_osculus:6.99759,Rhinichthys_falcatus:6.99759):4.3061):2.06335):1.45824):1.6768):4.53769):8.58306):1.35021,(((Dionda_episcopa:12.895,(Dionda_nigrotaeniata:7.56359,(Dionda_argentosa:3.32361,Dionda_melanops:3.32361):4.23998):5.3314):3.93312,(Dionda_serena:13.8803,Dionda_diaboli:13.8803):2.94776):12.3004,(((((Phenacobius_crassilabrum:7.82724,(Phenacobius_uranops:4.73507,Phenacobius_teretulus:4.73507):3.09217):7.23987,Phenacobius_catostomus:15.0671):0.088078,Phenacobius_mirabilis:15.1552):8.35274,((Erimystax_cahni:12.6362,Erimystax_insignis:12.6362):2.0644,(Erimystax_dissimilis:12.8995,Erimystax_harryi:12.8995):1.80116):8.80731):4.55931,(Platygobio_gracilis:25.6402,((Macrhybopsis_aestivalis:10.5789,Macrhybopsis_storeriana:10.5789):14.5682,((Agosia_chrysogaster:17.2911,((Algansea_aphanea:10.5992,(Algansea_avia:8.09745,Algansea_monticola:8.09745):2.5017):0.417055,((Algansea_lacustris:3.6748,Algansea_tincella:3.6748):1.14426,(Algansea_barbata:3.31693,Algansea_amecae:3.31693):1.50212):6.19716):6.27493):6.67586,((((((Luxilus_zonistius:13.8342,Luxilus_coccogenis:13.8342):7.79307,((Hybopsis_rubrifrons:12.5888,(Hybopsis_lineapunctata:11.9011,(Hybopsis_amblops:8.98047,(Hybopsis_winchelli:7.43126,Hybopsis_amnis:7.43126):1.54921):2.92068):0.687613):8.97809,((Cyprinella_callistia:20.2707,((Codoma_ornata:15.8307,((Tampichthys_mandibularis:11.5568,(Tampichthys_dichromus:7.44837,Tampichthys_catostomops:7.44837):4.10839):0.962761,(Tampichthys_erimyzonops:9.15036,Tampichthys_ipni:9.15036):3.36915):3.31114):3.77072,(((((Cyprinella_camura:1.71905,Cyprinella_galactura:1.71905):12.0115,(((Cyprinella_analostana:6.51238,Cyprinella_chloristia:6.51238):6.27137,(((Cyprinella_spiloptera:6.06915,Cyprinella_venusta:6.06915):3.33103,(Cyprinella_whipplei:8.16962,(Cyprinella_garmani:8.10546,(Cyprinella_lepida:6.62678,(Cyprinella_lutrensis:5.62507,(Cyprinella_bocagrande:0.865343,Cyprinella_formosa:0.865343):4.75973):1.00171):1.47868):0.064161):1.23056):2.52042,(Cyprinella_alvarezdelvillari:7.62724,((Cyprinella_rutila:2.46631,Cyprinella_xanthicara:2.46631):2.31456,(Cyprinella_proserpina:2.93878,Cyprinella_panarcys:2.93878):1.84209):2.84637):4.29336):0.863156):0.069179,Notropis_maculatus:12.8529):0.877598):1.18607,(Cyprinella_caerulea:14.0703,((Cyprinella_callitaenia:6.25018,Cyprinella_leedsi:6.25018):2.18672,(Cyprinella_callisema:4.63803,Cyprinella_nivea:4.63803):3.79887):5.63336):0.846335):0.830706,(Cyprinella_gibbsi:7.69637,Cyprinella_trichroistia:7.69637):8.05093):1.01011,((Cyprinella_labrosa:10.4942,Cyprinella_zanema:10.4942):3.89388,(Cyprinella_xaenura:12.9424,Cyprinella_pyrrhomelas:12.9424):1.44571):2.36932):2.84397):0.669338):0.729761,((Notropis_heterolepis:19.0892,(((Opsopoeodus_emiliae_emiliae:14.6917,(Pimephales_vigilax:13.4919,(Pimephales_tenellus:11.7873,Pimephales_promelas:11.7873):1.70463):1.19978):0.571484,Pimephales_notatus:15.2632):2.48024,Erimonax_monachus:17.7435):1.34571):1.58836,((((Notropis_baileyi:17.1621,(((Notropis_chrosomus:13.6048,((Notropis_lutipinnis:10.5634,Notropis_asperifrons:10.5634):2.9443,(Notropis_shumardi:8.88413,(Notropis_simus:7.19489,Notropis_candidus:7.19489):1.68923):4.62357):0.09707):1.05118,(Notropis_edwardraneyi:11.4947,(Notropis_braytoni:10.6292,(Notropis_blennius:3.45261,Notropis_potteri:3.45261):7.17659):0.865543):3.16119):1.78423,(Notropis_texanus:4.42381,Notropis_xaenocephalus:4.42381):12.0164):0.721941):0.821664,Notropis_nazas:17.9838):0.885043,(Notropis_sabinae:17.5674,((Hybognathus_hankinsoni:7.54173,Hybognathus_regius:7.54173):5.7084,(((Hybognathus_hayi:4.98909,(Hybognathus_nuchalis:2.61007,Hybognathus_argyritis:2.61007):2.37902):1.43189,Hybognathus_amarus:6.42098):5.23448,Hybognathus_placitus:11.6555):1.59467):4.31724):1.30144):1.238,(((((Notropis_ammophilus:7.74152,Notropis_rafinesquei:7.74152):3.74443,Notropis_longirostris:11.4859):5.11548,(Notropis_nubilus:9.51166,Notropis_ortenburgeri:9.51166):7.08977):0.870622,((Notropis_heterodon:14.3046,(Notropis_volucellus:11.4124,Notropis_boops:11.4124):2.89227):3.05662,Notropis_anogenus:17.3612):0.110798):1.6897,((Notropis_perpallidus:13.5969,Notropis_leuciodus:13.5969):0.131028,(Notropis_girardi:4.94168,Notropis_buchanani:4.94168):8.78628):5.43378):0.945078):0.570705):0.322951):0.566371):0.060402):0.43673,(((Notropis_imeldae:10.4932,(Notropis_boucardi:3.21567,Notropis_moralesi:3.21567):7.27757):3.4817,Yuriria_alta:13.9749):1.5049,((Notropis_amecae:6.94539,(Notropis_calientis:0.958788,Notropis_grandis:0.958788):5.98661):4.61695,Aztecula_sallaei:11.5623):3.9175):6.58414):0.588605,((Luxilus_cerasinus:17.2909,((Luxilus_albeolus:6.88759,(Luxilus_chrysocephalus:3.6046,Luxilus_cornutus:3.6046):3.28299):8.43979,(Luxilus_zonatus:10.0982,(Luxilus_pilsbryi:6.6337,Luxilus_cardinalis:6.6337):3.46453):5.22915):1.96347):3.48184,(Notropis_scepticus:19.045,(Notropis_telescopus:18.1292,((Notropis_buccatus:15.4946,Notropis_photogenis:15.4946):1.7064,(Notropis_dorsalis:15.5123,(Notropis_ariommus:14.567,(((Notropis_suttkusi:5.33992,Notropis_micropteryx:5.33992):0.865856,(Notropis_rubellus:4.96142,Notropis_percobromus:4.96142):1.24435):5.05244,((Notropis_amoenus:8.97325,Notropis_stilbius:8.97325):0.278997,((Notropis_amabilis:7.12953,Notropis_jemezanus:7.12953):1.23243,(Notropis_oxyrhynchus:5.09411,Notropis_atherinoides:5.09411):3.26785):0.890286):2.00597):3.30875):0.94535):1.6887):0.928181):0.915852):1.72765):1.87989):0.128488,(Hybopsis_hypsinotus:20.2142,((Lythrurus_ardens:8.13509,Lythrurus_lirus:8.13509):7.99902,((Lythrurus_bellus:9.45,Lythrurus_atrapiculus:9.45):2.41038,((Lythrurus_snelsoni:1.8492,Lythrurus_umbratilis:1.8492):8.84221,(Lythrurus_roseipinnis:9.89512,Lythrurus_fumeus:9.89512):0.796289):1.16897):4.27373):4.08014):2.56683):0.710738,((Notropis_hudsonius:18.5985,(Pteronotropis_hubbsi:9.91354,Notropis_harperi:9.91354):8.68491):1.69607,(Pteronotropis_euryzonus:9.42353,Pteronotropis_hypselopterus:9.42353):10.871):3.19728):0.475189):1.18014):0.493015):2.42708):1.06131):1.8445):2.59464,((Mylocheilus_caurinus:12.4406,Pogonichthys_macrolepidotus:12.4406):8.9985,((Iotichthys_phlegethontis:9.12948,(Richardsonius_balteatus:5.51752,Richardsonius_egregius:5.51752):3.61196):3.48413,(Clinostomus_elongatus:6.99921,Clinostomus_funduloides:6.99921):5.61439):8.82545):12.1286):2.76119):1.0678):9.09873):1.04351):13.3924):20.8281,((((Opsarius_koratensis:42.1746,(Luciosoma_setigerum:17.0739,Luciosoma_bleekeri:17.0739):25.1006):7.45143,((((Raiamas_bola:27.1058,((Neobola_bottegoi:21.12481,((Opsaridium_peringueyi:10.9246,Opsaridium_ubangiense:10.9246):7.79993,(Raiamas_buchholzi:18.1246,(Chelaethiops_bibie:14.5706,Mesobola_brevianalis:14.5706):3.55395):0.599973):2.4003):2.43801,Raiamas_senegalensis:23.5629):3.54294):1.44423,((((Barilius_shacra:18.7079,Barilius_bendelisis:18.7079):3.95038,(Barilius_barila:2.53534,Barilius_vagra:2.53534):20.123):0.882716,(Opsarius_pulchellus:19.6013,Barilius_caudiocellatus:19.6013):3.93968):3.21563,(Barilius_bakeri:6.41203,Barilius_canarensis:6.41203):20.3446):1.79338):7.07632,Raiamas_guttatus:35.6263):10.5053,((Aspidoparia_morar:25.6097,Salmophasia_bacaila:25.6097):5.12137,(Salmophasia_phulo:17.8171,Securicula_gora:17.8171):12.91398):15.4006):3.49435):12.3852,(Malayochela_maassi:35.9999,Nematabramis_steindachnerii:35.9999):26.0114):14.8337,((((Horadandia_atukorali:18.5642,Rasboroides_vaterifloris:18.5642):36.173,(((Rasbora_jacobsoni:24.6622,(Rasbora_einthovenii:18.7024,(Rasbora_kalochroma:6.28324,Rasbora_kottelati:6.28324):12.4191):5.95981):9.62955,((((Rasbora_rubrodorsalis:15.6516,(Rasbora_rasbora:9.21213,((Rasbora_elegans:5.54829,Rasbora_sumatrana:5.54829):2.26676,(Rasbora_paviana:4.08215,(Rasbora_hobelmani:3.09733,Rasbora_vulgaris:3.09733):0.984824):3.73289):1.39708):6.43947):1.46757,(Rasbora_steineri:13.9943,Rasbora_tubbi:13.9943):3.12491):7.83616,((((Rasbora_trilineata:12.3209,Rasbosoma_spilocerca:12.3209):9.24285,(((Rasbora_dusonensis:12.8871,(Rasbora_argyrotaenia:11.445,Rasbora_aurotaenia:11.445):1.44209):1.53589,Rasbora_borapetensis:14.4229):5.82421,((Trigonostigma_hengeli:9.43471,(Trigonostigma_espei:3.51521,Trigonostigma_heteromorpha:3.51521):5.9195):8.62456,Brevibora_dorsiocellata:18.0593):2.18787):1.31656):0.990011,(Rasbora_meinkeni:12.1309,Rasbora_vulcanus:12.1309):10.4229):0.126983,Rasbora_caudimaculata:22.6807):2.27463):6.90681,(Rasbora_bankanensis:25.9585,Rasbora_cephalotaenia:25.9585):5.90362):2.42957):7.51745,(Rasbora_daniconius:36.5177,((Kottelatia_brittani:9.77213,Pectenocypris_korthausae:9.77213):26.6185,(((Boraras_micros:12.4702,((Boraras_brigittae:2.39463,Boraras_merah:2.39463):4.83565,Boraras_maculatus:7.23028):5.23997):6.46009,Boraras_urophthalmoides:18.9303):11.3282,(Rasbora_kalbarensis:27.8303,(Trigonopoma_gracile:24.4882,Trigonopoma_pauciperforatum:24.4882):3.34212):2.4282):6.13212):0.127027):5.29149):12.9281):6.18108,(Amblypharyngodon_mola:35.9652,(Amblypharyngodon_melettinus:30.5779,Amblypharyngodon_chulabhornae:30.5779):5.3873):24.9531):12.8024,((((Danionella_dracula:33.9829,(Danionella_mirifica:19.7457,Danionella_translucida:19.7457):14.2372):28.3752,(Danio_dangila:38.4446,((Danio_choprae:27.7122,(Danio_erythromicron:16.1444,Danio_margaritatus:16.1444):11.5678):4.17055,((((Danio_nigrofasciatus:19.6939,Danio_aesculapii:19.6939):2.48077,Danio_kyathit:22.1747):3.07659,Danio_rerio:25.2513):2.28533,(Danio_kerri:18.125,(Danio_albolineatus:9.31528,(Danio_roseus:6.22706,Neolissochilus_tweediei:6.22706):3.08822):8.80974):9.41159):4.34618):6.56177):23.9135):3.30945,(((Laubuca_dadiburjori:42.6261,(Chela_cachius:39.2296,(Laubuca_caeruleostigmata:25.0422,(Laubuca_fasciata:0.717547,Laubuca_laubuca:0.717547):24.3247):14.1874):3.39652):7.57895,((Microrasbora_rubescens:28.5179,((((Devario_anomalus:13.0446,(Devario_devario:6.95014,(Devario_malabaricus:5.16445,Devario_pathirana:5.16445):1.78569):6.09448):2.4359,Devario_aequipinnatus:15.4805):3.41065,(((Devario_apogon:2.60272,Devario_laoensis:2.60272):10.9887,Devario_kakhienensis:13.5914):3.39392,(Devario_chrysotaeniatus:15.276,(Devario_regina:7.46092,Devario_annandalei:7.46092):7.81512):1.70926):1.90586):4.73679,(Devario_auropurpureus:14.0327,(Devario_maetaengensis:9.38061,Devario_shanensis:9.38061):4.65212):9.59522):4.88999):8.17167,Hemibarbus_longibarbis:36.6896):13.5155):3.42206,(Microdevario_gatesi:27.4276,(Microdevario_kubotai:13.4358,Microdevario_nana:13.4358):13.9919):26.1995):12.0403):6.04151,(Sundadanio_axelrodi:66.29789,((Esomus_longimanus:2.34665,Esomus_metallicus:2.34665):28.7067,((Esomus_caudiocellatus:1.94789,Esomus_ahli:1.94789):20.2577,Esomus_danricus:22.2056):8.8478):35.2445):5.41111):2.0117):3.12425):4.9144):1.97726,((((((Pseudobarbus_asper:6.59881,Pseudobarbus_tenuis:6.59881):9.07873,((Pseudobarbus_burgi:9.92408,(Pseudobarbus_quathlambae:7.18747,Pseudobarbus_burchelli:7.18747):2.73661):3.58704,(Pseudobarbus_phlegethon:7.7079,Pseudobarbus_afer:7.7079):5.80323):2.16642):24.2176,(Procypris_rabaudi:32.1503,(Aaptosyax_grypus:27.3924,((Carassius_carassius:12.4602,(Carassius_auratus_auratus:7.44936,Rhodeus_sinensis:7.449357):5.01083):13.3742,(Cyprinus_multitaeniata:3.79914,Cyprinus_carpio:3.79914):22.0353):1.55804):4.75788):7.74483):1.84302,(((((((Sinocyclocheilus_xunlensis:5.56678,(Sinocyclocheilus_macrophthalmus:3.68442,(Sinocyclocheilus_lingyunensis:1.45921,Sinocyclocheilus_longibarbatus:1.45921):2.22521):1.88236):3.84292,Sinocyclocheilus_yishanensis:9.4097):9.80892,((Sinocyclocheilus_cyphotergous:1.10285,Sinocyclocheilus_multipunctatus:1.10285):16.3364,(Sinocyclocheilus_macroscalus:17.0023,(Sinocyclocheilus_yangzongensis:12.4572,((((Sinocyclocheilus_grahami:2.58238,(Sinocyclocheilus_qiubeiensis:1.47599,Sinocyclocheilus_yimenensis:1.47599):1.10639):3.52064,(Sinocyclocheilus_maitianheensis:0.835786,(Sinocyclocheilus_anophthalmus:0.71839,Sinocyclocheilus_maculatus:0.71839):0.117396):5.26723):3.83096,(Sinocyclocheilus_lateristriatus:4.89389,Sinocyclocheilus_qujingensis:4.89389):5.04008):0.817887,((((Sinocyclocheilus_oxycephalus:4.21328,(Sinocyclocheilus_huaningensis:3.13544,Sinocyclocheilus_macrocephalus:3.13544):1.07784):1.46225,(Sinocyclocheilus_guishanensis:3.3767,Sinocyclocheilus_malacopterus:3.3767):2.29883):0.801717,Sinocyclocheilus_angustiporus:6.47724):2.31133,Sinocyclocheilus_purpureus:8.78857):1.96329):1.70532):4.54507):0.437022):1.77934):1.88743,(Sinocyclocheilus_anatirostris:14.2138,(Anchicyclocheilus_halfibindus:1.14413,Sinocyclocheilus_microphthalmus:1.14413):13.0697):6.8922):1.8738,((Sinocyclocheilus_bicornutus:5.36226,(Sinocyclocheilus_furcodorsalis:2.68187,(Sinocyclocheilus_tianeensis:2.13344,(Sinocyclocheilus_jiuxuensis:1.09478,Sinocyclocheilus_altishoulderus:1.09478):1.03866):0.548431):2.68039):6.00607,(Sinocyclocheilus_rhinocerous:8.30199,Sinocyclocheilus_hyalinus:8.30199):3.06635):11.6115):8.26955,Sinocyclocheilus_jii:31.2494):9.61784,(((Spinibarbus_hollandi:25.6221,(Spinibarbus_denticulatus:13.4336,Spinibarbus_sinensis:13.4336):12.1885):7.0348,(((((((Ptychobarbus_dipogon:6.26546,((Ptychobarbus_chungtienensis:1.73252,Ptychobarbus_kaznakovi:1.73252):4.31705,Ptychobarbus_conirostris:6.04956):0.215899):8.95338,(((((Gymnocypris_potanini:0.732063,Schizopygopsis_anteroventris:0.732063):6.01706,((Schizopygopsis_thermalis:3.2023,((Herzensteinia_microcephalus:2.09774,((Platypharodon_extremus:0.399253,(Schizopygopsis_kessleri:0.272331,Schizopygopsis_pylzovi:0.272331):0.126922):0.653856,Schizopygopsis_malacanthus:1.05311):1.04463):0.646234,(Gymnocypris_chilianensis:0.933605,Schizopygopsis_kialingensis:0.933605):1.81037):0.458321):2.64879,(Gymnocypris_namensis:1.33456,Schizopygopsis_younghusbandi:1.33456):4.51653):0.898031):2.13943,(Gymnocypris_waddellii:2.97932,(Chuanchia_labiosa:1.14048,(Gymnocypris_przewalskii:0.619182,Gymnocypris_eckloni:0.619182):0.521294):1.83885):5.90922):2.07651,Gymnodiptychus_integrigymnatus:10.9651):1.30536,Oxygymnocypris_stewartii:12.2704):2.94842):3.11075,((Gymnodiptychus_dybowskii:7.68943,Gymnodiptychus_pachycheilus:7.68943):8.24697,Diptychus_maculatus:15.9364):2.39318):6.76598,(((Schizothorax_pseudoaksaiensis_pseudoaksaiensis:3.43579,(Schizothorax_intermedius:0.727147,Schizothorax_eurystomus:0.727147):2.70864):10.1946,((((Schizothorax_oconnori:8.33,(Schizothorax_macropogon:5.80616,Schizothorax_waltoni:5.80616):2.52384):0.75775,(Schizothorax_molesworthi:6.25129,Schizothorax_malacanthus:6.25129):2.83646):0.915821,((((Schizothorax_rotundimaxillaris:0.554899,((Schizothorax_myzostomus:0.141005,Schizothorax_meridionalis:0.141005):0.14026,(Schizothorax_griseus:0.141005,Schizothorax_yunnanensis_paoshanensis:0.141005):0.140259):0.273635):2.08485,Schizothorax_dulongensis:2.63975):5.93553,((Aspiorhynchus_laticeps:0.219474,Schizothorax_biddulphi:0.219474):8.25622,(((Schizothorax_yunnanensis_yunnanensis:3.57932,Schizothorax_lantsangensis:3.57932):0.490267,(Schizothorax_gongshanensis:1.55518,Schizothorax_nukiangensis:1.55518):2.5144):3.64704,(Schizothorax_lissolabiatus:6.81739,(((Schizothorax_chongi:0.951798,Schizothorax_dolichonema:0.951798):1.43652,Schizothorax_prenanti:2.38832):0.725874,(Schizothorax_wangchiachii:2.83923,(Schizothorax_kozlovi:0.293143,Schizothorax_davidi:0.293143):2.54609):0.274963):3.7032):0.89924):0.75907):0.099577):0.946055,(Schizothorax_zarudnyi:6.93348,(((Schizopyge_curvifrons:4.5687,(Schizothorax_esocinus:2.30368,Schizothorax_macrophthalmus:2.30368):2.26502):0.384058,Schizothorax_labiatus:4.95276):0.118675,(Schizothorax_richardsonii:1.77621,Schizothorax_plagiostomus:1.77621):3.29522):1.86204):2.58786):0.482237):1.59914,Schizothorax_argentatus:11.6027):2.02766):4.58722,(Percocypris_tchangi:11.3265,Percocypris_pingi:11.3265):6.89105):6.87799):3.35465,(Garra_gravelyi:26.8173,((Carasobarbus_apoensis:5.56177,(Cyprinion_kais:0.849061,Cyprinion_macrostomum:0.849061):4.71271):20.2259,((((((((Capoeta_barroisi:6.57131,Capoeta_damascina:6.57131):3.19619,Capoeta_angorae:9.7675):1.26878,(Capoeta_banarescui:9.562,((Capoeta_tinca:1.14327,Capoeta_baliki:1.14327):3.49705,(Capoeta_pestai:2.56764,Capoeta_antalyensis:2.56764):2.07268):4.92168):1.47429):1.2038,(Capoeta_ekmekciae:2.79294,Capoeta_capoeta_capoeta:2.79294):9.44715):1.90833,Capoeta_trutta:14.1484):2.1702,(((((Barbus_longiceps:4.8874,(Luciobarbus_xanthopterus:2.75432,(Luciobarbus_esocinus:0.879053,Luciobarbus_mystaceus:0.879053):1.87527):2.13307):2.02158,(Luciobarbus_brachycephalus:6.17013,Luciobarbus_capito:6.17013):0.738846):3.51876,(Barbus_callensis:3.19835,Barbus_nasus:3.19835):7.22939):1.45879,Luciobarbus_graecus:11.8865):1.94806,((Barbus_albanicus:12.2332,Luciobarbus_mursa:12.2332):1.31994,(Barbus_subquincunciatus:12.2995,((Luciobarbus_graellsii:4.47133,(Luciobarbus_microcephalus:2.35971,Luciobarbus_guiraonis:2.35971):2.11162):4.82619,(((Luciobarbus_comizo:1.14394,Luciobarbus_steindachneri:1.14394):2.26427,Luciobarbus_bocagei:3.40821):3.16151,Luciobarbus_sclateri:6.56972):2.7278):3.00199):1.25362):0.281464):2.48403):2.98169,((((Barbus_caninus:0.976068,Barbus_balcanicus:0.976068):9.47384,(Barbus_haasi:6.47145,Barbus_meridionalis:6.47145):3.97845):1.80148,(Barbus_borysthenicus:6.05652,(Barbus_barbus:5.34281,((Barbus_lacerta:4.51911,(Barbus_tyberinus:1.52255,Barbus_plebejus:1.52255):2.99656):0.163426,(Barbus_ciscaucasicus:2.98705,Barbus_tauricus:2.98705):1.69549):0.660276):0.713711):6.19487):0.324075,(Barbus_prespensis:9.12812,((Barbus_euboicus:4.03808,Barbus_peloponnesius:4.03808):4.12059,Barbus_cyclolepis:8.15867):0.969447):3.44735):6.72484):1.36654,Aulopyge_huegelii:20.6668):5.12086):1.02961):1.63291):1.31467,(Acrossocheilus_paradoxus:21.8043,(Acrossocheilus_beijiangensis:21.666,(((Onychostoma_lepturum:15.8265,Onychostoma_ovale:15.8265):0.181599,Onychostoma_barbatulum:16.0081):3.78134,(((Acrossocheilus_hemispinus:10.8815,Acrossocheilus_monticola:10.8815):5.7358,(Onychostoma_alticorpus:9.10714,Onychostoma_simum:9.10714):7.51016):1.59425,Folifer_brevifilis:18.2115):1.57792):1.87654):0.138314):7.96057):1.86594,(Puntius_sarana:26.8027,(((((Barbus_reinii:11.1494,(((((Carasobarbus_chantrei:2.95787,Carasobarbus_luteus:2.95787):1.17445,Carasobarbus_canis:4.13233):0.417707,Kosswigobarbus_kosswigi:4.55003):2.92061,(Barbus_fritschii:4.074,Barbus_harterti:4.074):3.39664):1.92322,Barbus_grypus:9.39386):1.75551):1.9232,((Varicorhinus_mariae:5.63108,Varicorhinus_steindachneri:5.63108):4.8519,(Varicorhinus_beso:9.51235,((((Barbus_oxyrhynchus:4.856,(Barbus_sacratus:4.19043,((((Labeobarbus_acutirostris:0.681425,Labeobarbus_longissimus:0.681425):0.256294,((Labeobarbus_crassibarbis:0.273697,(Labeobarbus_dainellii:0.088845,Labeobarbus_gorguari:0.088845):0.184852):0.375029,Labeobarbus_brevicephalus:0.648726):0.288993):1.25584,Labeobarbus_intermedius:2.19356):0.778609,(Barbus_bynni_bynni:2.19591,(Barbus_petitjeani:0.129481,Barbus_bynni_occidentalis:0.129481):2.06643):0.776259):1.21826):0.665565):1.14454,Barbus_ethiopicus:6.00054):1.00826,((Varicorhinus_nelspruitensis:4.3899,(Labeobarbus_aeneus:2.32776,(Labeobarbus_capensis:1.77423,Labeobarbus_polylepis:1.77423):0.553538):2.06214):1.57114,(Labeobarbus_johnstonii:2.50874,Labeobarbus_marequensis:2.50874):3.4523):1.04776):1.07643,(Barbus_wurtzi:1.11991,Barbus_gruveli:1.11991):6.96531):1.42713):0.970628):2.58959):0.463178,(Varicorhinus_maroccanus:10.9041,Labeobarbus_habereri:10.9041):2.63168):2.36962,((Tor_sinensis:9.58798,((Tor_khudree:0.175832,Tor_malabaricus:0.175832):6.69017,((Tor_tor:3.86133,Tor_tambra:3.86133):0.148815,(Tor_macrolepis:0.586545,Tor_putitora:0.586545):3.4236):2.85586):2.72197):5.19289,(Neolissochilus_stracheyi:10.9761,((Tor_progeneius:2.504179,(Tor_qiaojiensis:1.38706,(Tor_douronensis:0.076043,Neolissochilus_heterostomus:0.076043):1.31102):1.11712):5.20525,(Neolissochilus_hexagonolepis:3.25214,Neolissochilus_soroides:3.25214):4.45729):3.26663):3.8048):1.1245):4.91191,Bangana_ariza:20.8173):5.98544):4.82811):1.02608):6.38772,((Puntius_snyderi:21.3646,Puntius_semifasciolatus:21.3646):17.2084,(((((Puntius_chalakkudiensis:17.4186,Puntius_denisonii:17.4186):9.57638,(((Puntius_singhala:7.17645,Puntius_filamentosus:7.17645):1.56337,Puntius_arulius:8.73982):9.71846,Puntius_srilankensis:18.4583):8.5367):6.84968,(((Puntius_johorensis:22.4951,Puntius_lineatus:22.4951):8.28047,(Puntius_everetti:26.8427,(Puntius_binotatus:19.8197,(Puntius_sealei:17.02,Puntius_oligolepis:17.02):2.7997):7.02305):3.93286):2.29228,(((Puntius_fasciatus:28.3669,(Puntius_gelius:26.2481,((Puntius_conchonius:15.9817,((((Puntius_melanomaculatus:2.6488,Puntius_ticto:2.6488):5.67785,(Puntius_bandula:3.89979,Puntius_nigrofasciatus:3.89979):4.42685):2.32988,Puntius_reval:10.6565):2.74783,Puntius_cumingii:13.4043):2.5774):3.39636,Puntius_phutunio:19.3781):6.87004):2.11881):2.5214,((((Barboides_britzi:23.1514,((Barbus_callipterus:16.5093,(Barbus_leonensis:12.9104,(Barbus_trimaculatus:8.80112,(Barbus_humilis:0.130666,Barbus_tanapelagius:0.130666):8.67046):4.10929):3.59887):4.0559,((Barbus_sublineatus:12.1624,Barbus_nyanzae:12.1624):5.32174,Barbus_fasciolatus:17.4842):3.08099):2.58619):1.80831,(Barbus_paludinosus:22.5995,((Barbus_motebensis:3.37674,Barbus_anoplus:3.37674):3.86599,Barbus_gurneyi:7.24272):15.3568):2.36016):0.769337,Barbus_kerstenii:25.729):1.93747,(((Barbus_guineensis:21.9933,((Barbus_ablabes:15.0096,(Barbus_macrops:10.6304,Barbus_bigornei:10.6304):4.37922):2.76554,Barbus_cadenati:17.7752):4.21817):2.49269,Barbus_mattozi:24.486):2.51269,(Barbus_pleurogramma:24.9976,(((Barbus_calidus:5.83034,Barbus_erubescens:5.83034):6.20771,(Barbus_serra:3.1508,Barbus_andrewi:3.1508):8.88725):7.31978,Barbus_trevelyani:19.3578):5.63973):2.00114):0.667762):3.22188):1.24573,(((Puntius_tetrazona:21.1589,(Hampala_bimaculata:20.4389,Hampala_macrolepidota:20.4389):0.719951):9.35574,Puntius_pleurotaenia:30.5146):0.539361,((Puntius_martenstyni:27.2684,Puntius_vittatus:27.2684):2.43528,(((((Puntius_mahecola:11.8225,Puntius_dorsalis:11.8225):7.65579,Puntius_chola:19.4782):0.08216,Puntius_parvus:19.5604):1.35058,Puntius_sophore:20.911):5.13066,(Puntius_bimaculatus:18.6422,Puntius_titteya:18.6422):7.39944):3.662):1.35034):1.08009):0.933778):0.776809):1.23965,Eirmotus_octozona:35.08436):2.33038,(((Balantiocheilos_melanopterus:11.9445,Barbonymus_schwanenfeldii:11.9445):5.2596,(Puntius_bramoides:14.2489,Barbonymus_collingwoodii:14.2489):2.95526):6.76193,(((((((Hypsibarbus_vernayi:10.596,Hypsibarbus_malcolmi:10.596):3.43879,(Sikukia_stejnegeri:11.9906,Hypsibarbus_wetmorei:11.9906):2.04409):1.83439,(Barbonymus_gonionotus:4.25471,Cyclocheilichthys_apogon:4.25471):11.6144):0.120336,(Onychostoma_gerlachi:9.21848,(Mystacoleucus_lepturus:5.02743,(Mystacoleucus_chilopterus:0.683745,Mystacoleucus_marginatus:0.683745):4.34369):4.19105):6.77099):1.73985,(Sawbwa_resplendens:13.2152,Poropuntius_opisthoptera:13.2152):4.51407):0.255405,(Scaphognathops_stejnegeri:13.6137,Scaphognathops_bandanensis:13.6137):4.37099):4.82228,(Cyclocheilichthys_janthochir:20.3049,((((Puntius_brevis:5.30698,Puntioplites_falcifer:5.30698):2.57048,Puntioplites_proctozystron:7.87745):4.58178,(Puntioplites_bulu:6.73694,Puntioplites_waandersi:6.73694):5.72229):7.70765,(Cyclocheilichthys_repasson:0.151689,Cyclocheilichthys_armatus:0.151689):20.0152):0.138022):2.50209):1.15908):13.4486):1.15826):0.471676):1.8226):0.87093):3.02392,((Catlocarpio_siamensis:18.1412,Probarbus_jullieni:18.1412):24.2181,(((((Lobocheilos_melanotaenia:22.6651,(Henicorhynchus_lineatus:10.2459,(Henicorhynchus_lobatus:3.55966,Henicorhynchus_siamensis:3.55966):6.68627):12.4191):4.40366,((Cirrhinus_molitorella:24.617,(Crossocheilus_nigriloba:18.9203,Crossocheilus_reticulatus:18.9203):5.69671):1.63078,((Osteochilus_melanopleurus:21.1961,((Osteochilus_spilurus:15.1132,((Osteochilus_microcephalus:7.42795,Osteochilus_waandersii:7.42795):1.75771,(Osteochilus_lini:6.81977,Osteochilus_salsburyi:6.81977):2.3659):5.92753):4.2275,(Luciosoma_spilopleura:6.78408,Osteochilus_vittatus:6.78408):12.5566):1.85544):3.05392,((Epalzeorhynchos_bicolor:14.9051,Epalzeorhynchos_kalopterus:14.9051):0.607977,Epalzeorhynchos_frenatus:15.5131):8.73692):1.99777):0.820886):2.17387,Paracrossochilus_vittatus:29.2426):2.60339,(Lobocheilos_bo:30.4215,((Bangana_lemassoni:23.5056,((((Bangana_lippus:7.30339,Bangana_tonkinensis:7.30339):1.34277,Mekongina_erythrospila:8.64616):8.89304,(Garra_cryptonemus:16.4196,(Garra_imberba:13.3402,Garra_micropulvinus:13.3402):3.07942):1.11956):2.68423,(Linichthys_laticeps:18.7606,((((((Qianlabeo_striatus:7.15395,Pseudogyrinocheilus_prochilus:7.15395):4.47795,Pseudocrossocheilus_liuchengensis:11.6319):0.726707,(((Pseudocrossocheilus_papillolabrus:2.92893,Pseudocrossocheilus_tridentis:2.92893):4.69437,((Pseudocrossocheilus_longibullus:0.970679,Pseudocrossocheilus_nigrovittatus:0.970679):1.98254,Pseudocrossocheilus_bamaensis:2.95322):4.67008):4.22771,(Ptychidio_jordani:11.1759,(Parasinilabeo_assimilis:10.038,(Rectoris_posehensis:8.94139,(Semilabeo_obscurus:7.18685,Semilabeo_notabilis:7.18685):1.75454):1.09663):1.13788):0.675112):0.50759):1.77139,(Sinocrossocheilus_megalophthalmus:5.72743,(Hongshuia_paoli:4.71232,Hongshuia_microstomatus:4.71232):1.01511):8.40256):1.19925,Sinocrossocheilus_labiatus:15.3292):2.15125,(Discogobio_yunnanensis:10.5312,((Discogobio_laticeps:8.6731,((Discogobio_brachyphysallidos:5.09022,Discogobio_macrophysallidos:5.09022):2.38985,Discogobio_tetrabarbatus:7.48007):1.19303):0.241189,(Discogobio_bismargaritus:7.44665,(Discocheilus_wui:5.86125,Discolabeo_wuluoheensis:5.86125):1.5854):1.46763):1.61687):6.94933):1.28014):1.46279):3.2822):5.17011,((((((Garra_kempi:16.912,((Crossocheilus_latius:7.00152,Akrokolioplax_bicornis:7.00152):0.066432,Crossocheilus_burmanicus:7.06795):9.84408):0.115606,Garra_tengchongensis:17.0276):3.5467,((Garra_mirofrontis:9.05304,Garra_orientalis:9.05304):7.91545,((((Phreatichthys_andruzzii:13.8237,Garra_spilota:13.8237):0.110664,((Garra_barreimiae_barreimiae:7.13309,Garra_rufa:7.13309):5.04556,(Garra_tana:0.437803,(Garra_regressus:0.233085,Garra_dembecha:0.233085):0.204717):11.7408):1.75574):0.272846,(Garra_ceylonensis:12.2483,(Garra_congoensis:7.50344,Garra_makiensis:7.50344):4.74489):1.95889):1.70517,(Garra_annandalei:14.9755,(Garra_fuliginosa:13.4881,Garra_gotyla_gotyla:13.4881):1.48743):0.936859):1.05608):3.60585):0.105176,Garra_flavatra:20.6795):1.61888,Garra_variabilis:22.2984):3.01573,(Garra_cambodgiensis:7.48932,Garra_fasciacauda:7.48932):17.8248):3.36161):1.74582):1.42442):3.44729,((Bangana_behri:10.9539,(Labeo_bata:9.30769,Labeo_boga:9.30769):1.64626):14.4633,(((((Labeo_calbasu:5.58161,Labeo_chrysophekadion:5.58161):8.79257,((((Labeo_lineatus:5.7474,Labeo_fimbriatus:5.7474):4.42451,Labeo_stolizkae:10.1719):0.745867,((Labeo_gonius:7.24331,(Labeo_rohita:7.12068,(Catla_catla:6.84951,Labeo_dussumieri:6.84951):0.271163):0.122636):0.201726,Labeo_yunnanensis:7.44504):3.47274):3.35732,(Labeo_forskalii:9.18897,Labeo_sorex:9.18897):5.08613):0.099087):2.77796,((Labeo_dyocheilus:9.72207,Bangana_pierrei:9.72207):6.13167,(Labeo_batesii:13.608,((Labeo_weeksii:3.19921,Labeo_senegalensis:3.19921):9.31616,Labeo_coubie:12.5154):1.09263):2.24574):1.2984):2.78016,(Labeo_boggut:16.4338,Cirrhinus_microlepis:16.4338):3.4985):2.22696,Cirrhinus_cirrhosus:22.1593):3.25802):9.87597):7.06611):2.4027):22.8396,(Acrossocheilus_yunnanensis:67.4016,(Psilorhynchus_sucatio:29.8182,Psilorhynchus_homaloptera:29.8182):37.5834):0.200036):16.1349):1.4707):12.6026,(((((((Leptobotia_pellegrini:10.8653,((Leptobotia_tchangi:6.91032,Leptobotia_taeniops:6.91032):1.56467,Leptobotia_rubrilabris:8.47499):2.39033):2.12996,((Leptobotia_guilinensis:2.48459,Leptobotia_tientainensis:2.48459):8.78226,Leptobotia_elongata:11.2668):1.72843):3.53441,(((Parabotia_banarescui:8.97172,(Parabotia_fasciata:3.05085,Leptobotia_mantschurica:3.05085):5.92087):1.83116,Parabotia_lijiangensis:10.8029):2.84146,Leptobotia_curta:13.6443):2.88534):41.2308,((((Sinibotia_robusta:15.6315,((Sinibotia_pulchra:5.28322,Leptobotia_zebra:5.28322):7.82241,Sinibotia_superciliaris:13.1056):2.52586):4.19124,(Yasuhikotakia_nigrolineata:4.55362,Yasuhikotakia_sidthimunki:4.55362):15.2691):3.95938,(((Syncrossus_helodes:11.8542,(Syncrossus_beauforti:6.53065,Syncrossus_berdmorei:6.53065):5.32357):5.35474,(Syncrossus_hymenophysa:13.5481,Syncrossus_reversa:13.5481):3.66083):2.31274,(Yasuhikotakia_lecontei:16.0339,(((Yasuhikotakia_modesta:9.38348,Yasuhikotakia_morleti:9.38348):2.01782,Yasuhikotakia_eos:11.4013):0.099164,Yasuhikotakia_caudipunctata:11.5005):4.53346):3.48779):4.26039):16.339,((Botia_striata:17.285,((Botia_rostrata:11.6397,(Botia_lohachata:0.745713,Botia_almorhae:0.745713):10.894):3.09475,Botia_kubotai:14.7345):2.55052):17.2089,Chromobotia_macracanthus:34.4939):5.6272):17.6394):15.8255,(Serpenticobitis_zonata:65.9983,((((((Sabanejewia_larvata:20.478,((Sabanejewia_caucasica:8.22107,(Sabanejewia_balcanica:2.54131,Sabanejewia_aurata_aurata:2.54131):5.67976):5.83381,Sabanejewia_romanica:14.0549):6.42316):16.7084,(((Misgurnus_fossilis:25.5226,((Misgurnus_mizolepis:5.09532,Paramisgurnus_dabryanus:5.09532):16.8537,(Misgurnus_anguillicaudatus:14.6946,Misgurnus_nikolskyi:14.6946):7.25435):3.5736):3.73097,(Koreocobitis_naktongensis:16.0808,Koreocobitis_rotundicaudata:16.0808):13.1727):5.25003,(((Cobitis_striata:22.2592,Cobitis_taenia:22.2592):2.37661,((Niwaella_delicata:20.0676,((Cobitis_biwae:3.67302,Cobitis_matsubarai:3.67302):10.391,(Cobitis_shikokuensis:4.64257,Cobitis_takatsuensis:4.64257):9.42142):6.00365):3.01762,(Cobitis_melanoleuca_melanoleuca:18.8173,(Cobitis_choii:1.50554,Cobitis_granoei:1.50554):17.3118):4.2679):1.5506):2.75845,((Cobitis_pacifica:17.7047,Iksookimia_koreensis:17.7047):5.23166,((((Niwaella_brevifasciata:11.4867,((Iksookimia_yongdokensis:4.67789,(Iksookimia_hugowolfeldi:2.50878,(Iksookimia_longicorpa:1.81923,Cobitis_hankugensis:1.81923):0.689548):2.16911):4.14781,Niwaella_multifasciata:8.8257):2.66104):4.35207,((Cobitis_tetralineata:9.48637,Misgurnus_mohoity:9.48637):5.87817,((Cobitis_zanandreai:13.6033,((((Cobitis_albicoloris:0.394322,(Cobitis_puncticulata:0.098709,Cobitis_strumicae:0.098709):0.295613):8.27466,((Cobitis_levantina:5.87794,(Cobitis_elazigensis:4.699,Cobitis_linea:4.699):1.17893):2.2803,((Cobitis_vettonica:2.52087,(Cobitis_paludica:1.29851,Cobitis_maroccana:1.29851):1.22236):3.29281,Cobitis_calderoni:5.81368):2.34456):0.510745):0.386062,((Cobitis_bilseli:2.93408,Cobitis_turcica:2.93408):5.34314,(((Cobitis_hellenica:0.074897,Cobitis_arachthosensis:0.074897):5.82645,(Cobitis_trichonica:4.86972,Cobitis_meridionalis:4.86972):1.03163):2.00841,((Cobitis_stephanidisi:0.537339,Cobitis_vardarensis:0.537339):4.09571,(Cobitis_fahirae:3.04104,Cobitis_elongatoides:3.04104):1.59201):3.27671):0.367455):0.777821):4.27116,(Cobitis_bilineata:10.8149,Cobitis_elongata:10.8149):2.51135):0.277114):1.36756,(Cobitis_macrostigma:13.1946,Cobitis_lutheri:13.1946):1.77632):0.393654):0.474271):1.83672,Cobitis_dolichorhynchus:17.6755):3.48301,(Cobitis_sinensis:17.6036,Cobitis_laterimaculata:17.6036):3.55492):1.7778):4.45798):7.10927):2.68287):2.83038,Cobitis_misgurnoides:40.0168):12.8993,(Lepidocephalus_macrochir:45.0955,Canthophrys_gongota:45.0955):7.82061):3.52983,((((Pangio_doriae:26.319,Pangio_anguillaris:26.319):11.5476,((Pangio_oblonga:14.9773,Pangio_pangia:14.9773):4.39857,(Pangio_kuhlii:17.8569,Pangio_cuneovirgata:17.8569):1.51898):18.4908):10.3423,(Neoeucirrhichthys_maydelli:40.817,((Lepidocephalichthys_guntea:25.7175,(Botia_histrionica:14.203,Lepidocephalichthys_hasselti:14.203):11.5145):5.6142,Lepidocephalus_thermalis:31.3317):9.48536):7.39198):4.5887,((Acanthopsoides_gracilentus:18.3584,Acanthopsoides_hapalias:18.3584):20.3131,((Kottelatlimia_katik:19.5014,Kottelatlimia_pristes:19.5014):15.1822,Acanthopsoides_robertsi:34.6836):3.98796):14.12612):3.64826):9.45473,((((((Balitora_elongata:29.092,(Sinohomaloptera_kwangsiensis:23.4224,(Metahomaloptera_omeiensis:19.0222,((Sinogastromyzon_puliensis:13.9711,(Sinogastromyzon_sichangensis:12.1903,((Sinogastromyzon_hsiashiensis:6.83763,Sinogastromyzon_szechuanensis:6.83763):2.09216,Lepturichthys_dolichopterus:8.92978):3.26047):1.78087):3.61632,(Sinogastromyzon_wui:15.4626,(Lepturichthys_fimbriata:10.4319,((Jinshaia_sinensis:1.8001,Hemimyzon_abbreviata:1.8001):7.60191,(Hemimyzon_formosanus:4.80044,Hemimyzon_taitungensis:4.80044):4.60157):1.02991):5.03064):2.12488):1.43479):4.40018):5.66963):24.2722,((Barbucca_diabolica:44.2433,((Balitora_annamitica:29.4521,(Homaloptera_zollingeri:28.5212,(Homaloptera_leonardi:23.1061,Homaloptera_parclitella:23.1061):5.41505):0.930859):8.73125,Homaloptera_smithi:38.1833):6.05996):4.96568,((Sewellia_lineolata:34.0662,(Beaufortia_kweichowensis:28.082,((((Formosania_lacustre:4.61696,(Formosania_stigmata:1.26963,Formosania_fascicauda:1.26963):3.34734):9.01001,(Vanmanenia_stenosoma:11.2902,Vanmanenia_pingchowensis:11.2902):2.33677):9.46737,(((((Pseudogastromyzon_myersi:12.0995,(Pseudogastromyzon_changtingensis_tungpeiensis:4.50008,Pseudogastromyzon_fasciatus:4.50008):7.59937):6.4783,Vanmanenia_hainanensis:18.5778):1.92012,Erromyzon_sinensis:20.4979):1.11672,(Liniparhomaloptera_disparis_disparis:17.7672,Paraprotomyzon_bamaensis:17.7672):3.84738):0.122562,Pseudogastromyzon_cheni:21.7372):1.35718):3.20273,Beaufortia_szechuanensis:26.2971):1.78496):5.98413):5.2717,(Gastromyzon_lepidogaster:32.3145,Gastromyzon_ctenocephalus:32.3145):7.0234):9.87108):4.15534):8.03901,((Traccatichthys_pulcher:40.9881,((Lefua_nikkonis:8.91424,Lefua_costata:8.91424):25.8327,Oreonectes_platycephalus:34.7469):6.24113):10.0467,((((Nemacheilus_longicaudus:28.9366,((Nemacheilus_rueppelli:22.6114,Schistura_balteata:22.6114):1.69629,Mesonoemacheilus_triangularis:24.3077):4.62893):7.71922,(Nemacheilus_pavonaceus:28.9459,((Acanthocobitis_zonalternans:22.2989,Acanthocobitis_botia:22.2989):6.09492,Schistura_savona:28.3938):0.552067):7.71001):4.87891,((((Oxynoemacheilus_merga:21.7416,(Oxynoemacheilus_bureschi:10.1744,Oxynoemacheilus_pindus:10.1744):11.5672):11.6114,((((Schistura_vinciguerrae:14.8887,((Nemacheilus_subfusca:10.9636,Schistura_beavani:10.9636):1.54023,Schistura_montana:12.5039):2.3848):3.56723,(Schistura_rupecula:16.27382,Nemacheilus_polytaenia:16.2739):2.18206):2.33718,Schistura_kloetzliae:20.7931):3.5126,Yunnanilus_brevis:24.3057):9.0473):0.139636,Schistura_corica:33.4926):3.18821,Nemacheilus_masyai:36.6808):4.85393):6.93395,((((((Triplophysa_stenura:6.47776,Triplophysa_stewarti:6.47776):5.16596,Triplophysa_stoliczkai:11.6437):2.23021,(Triplophysa_orientalis:10.2524,Triplophysa_bleekeri:10.2524):3.6215):6.58749,Triplophysa_siluroides:20.4614):16.0535,(Triplophysa_gundriseri:36.3873,(Barbatula_nuda:28.18,Barbatula_barbatula:28.18):8.20727):0.127642):8.90146,(Tuberoschistura_baenzigeri:40.6833,(((Paracobitis_variegatus:14.1949,(Paracobitis_acuticephala:5.53542,Paracobitis_anguillioides:5.53542):8.65948):3.66577,Paracobitis_potanini:17.8607):20.08823,((Schistura_bucculenta:11.6044,Schistura_nicholsi:11.6044):1.73856,((Schistura_fasciolata:9.14715,(Schistura_reidi:7.54782,(Schistura_spilota:2.08439,Schistura_sexcauda:2.08439):5.46342):1.59933):2.58199,(Sectoria_heterognathos:1.22877,Schistura_longa:1.22877):10.5004):1.61379):24.606):2.73441):4.73309):3.0523):2.56601):10.3686):2.21795,Ellopostoma_mystax:63.6213):2.06299,Pseudogastromyzon_fangi:65.6842):0.118903,Vaillantella_maassi:65.8031):0.09755):0.097584):7.58767):13.756,(Gyrinocheilus_pustulosus:28.8175,(Gyrinocheilus_aymonieri:10.6269,Gyrinocheilus_pennocki:10.6269):18.1905):58.5245):5.19667,((((((((((Catostomus_bernardini:2.14239,(Catostomus_leopoldi:0.853457,Catostomus_cahita:0.853457):1.28893):6.38588,Catostomus_wigginsi:8.52827):2.62975,Xyrauchen_texanus:11.158):2.49253,((Catostomus_macrocheilus:6.17671,Catostomus_columbianus:6.17671):1.38961,(Catostomus_microps:2.2678,Catostomus_tahoensis:2.2678):5.29852):6.08422):2.00972,(((Catostomus_nebuliferus:5.40972,Catostomus_plebeius:5.40972):6.74909,Catostomus_catostomus_catostomus:12.1588):1.94131,(Catostomus_commersonii:13.951,((((Chasmistes_brevirostris:0.234045,Catostomus_rimiculus:0.234045):0.21221,Catostomus_snyderi:0.446254):1.11226,Deltistes_luxatus:1.55852):3.66604,Catostomus_occidentalis_occidentalis:5.22456):8.72641):0.149147):1.56015):9.15056,((Minytrema_melanops:18.8892,(Erimyzon_oblongus:9.26919,(Erimyzon_tenuis:5.22612,Erimyzon_sucetta:5.22612):4.04307):9.62):5.34219,((((Moxostoma_cervinum:9.87744,(Moxostoma_carinatum:4.04453,Moxostoma_macrolepidotum:4.04453):5.83291):1.38298,(((Moxostoma_pappillosum:8.07507,(Moxostoma_anisurum:3.49429,Moxostoma_collapsum:3.49429):4.58077):2.67599,(Moxostoma_robustum:9.9493,(Moxostoma_hubbsi:5.91331,(Moxostoma_breviceps:4.00016,Moxostoma_pisolabrum:4.00016):1.91315):4.03599):0.80176):0.141568,Moxostoma_erythrurum:10.8926):0.367795):1.69873,((Moxostoma_valenciennesi:9.39694,(((Moxostoma_ariommum:5.25579,((Moxostoma_lachneri:1.08958,Moxostoma_mascotae:1.08958):1.83988,Moxostoma_congestum:2.92945):2.32634):2.76105,Moxostoma_duquesnii:8.01684):0.424424,Moxostoma_poecilurum:8.44126):0.955676):1.35935,(Moxostoma_rupiscartes:9.59661,Moxostoma_austrinum:9.59661):1.15968):2.20285):5.32587,((Thoburnia_atripinnis:14.6836,((Hypentelium_nigricans:7.8061,Hypentelium_etowanum:7.8061):3.71327,Hypentelium_roanokense:11.5194):3.16419):1.98301,(Thoburnia_hamiltoni:8.00191,Thoburnia_rhothoeca:8.00191):8.66466):1.61844):5.94636):0.579451):8.35139,(Cycleptus_elongatus:5.7475,Cycleptus_meridionalis:5.7475):27.4147):1.52042,(Carpiodes_carpio:29.1747,(Ictiobus_labiosus:17.818,((Ictiobus_meridionalis:2.20306,(Ictiobus_niger:1.23162,Ictiobus_bubalus:1.23162):0.971449):1.8715,Ictiobus_cyprinellus:4.07457):13.7435):11.3567):5.50791):3.01843,Myxocyprinus_asiaticus:37.7011):4.40287,Carpiodes_velifer:42.1039):50.4347):5.27129):34.1587):14.863):11.6681,Denticeps_clupeoides:158.5):8.35271,((Alepocephalus_tenebrosus:43.4059,(Rouleina_attrita:13.5048,Xenodermichthys_copei:13.5048):29.9012):0.237139,(Normichthys_operosus:37.835,Sagamichthys_abei:37.835):5.80803):123.209):13.0673):12.5583):12.3887,(((((((((Avocettina_infans:45.9599,Nemichthys_scolopaceus:45.9599):21.6267,((Eurypharynx_pelecanoides:37.9291,((Serrivomer_samoensis:21.1181,(Stemonidium_hypomelas:18.3386,Serrivomer_sector:18.3386):2.77959):16.6836,Serrivomer_beanii:37.8018):0.127313):7.70014,(Anguilla_mossambica:16.8932,(((((Anguilla_bicolor_bicolor:3.74835,Anguilla_bicolor_pacifica:3.74835):3.02988,(((Anguilla_luzonensis:3.12242,Anguilla_nebulosa:3.12242):1.86852,Anguilla_obscura:4.99094):0.810196,(Anguilla_interioris:4.82662,Anguilla_marmorata:4.82662):0.974516):0.977095):2.31354,(Anguilla_megastoma:7.61142,(Anguilla_japonica:6.663,(Anguilla_celebesensis:5.51417,Anguilla_reinhardtii:5.51417):1.14883):0.948421):1.48035):1.96613,Anguilla_malgumora:11.0579):1.89736,((Anguilla_anguilla:3.05287,Anguilla_rostrata:3.05287):8.59167,(Anguilla_dieffenbachii:10.4093,(Anguilla_australis_australis:0.492304,Anguilla_australis_schmidti:0.492304):9.91697):1.23526):1.31071):3.93793):28.736):21.9574):13.9709,((Paraconger_notialis:52.7008,Heteroconger_hassi:52.7008):23.3024,((((Coloconger_cadenati:36.9314,(Thalassenchelys_coheni:35.6814,Derichthys_serpentinus:35.6814):1.24994):7.86745,(Nessorhamphus_danae:21.9636,Nessorhamphus_ingolfianus:21.9636):22.8352):27.9056,(((Myrophis_platyrhynchus:21.7469,((Ahlia_egmontis:9.80339,Myrophis_punctatus:9.80339):4.03985,Myrophis_vafer:13.8432):7.90367):13.05036,Scolecenchelys_breviceps:34.7973):29.8875,(Echelus_myrus:43.4648,(((Ichthyapus_ophioneus:27.2841,((Myrichthys_breviceps:18.4673,Myrichthys_maculosus:18.4673):6.68908,(Ophichthus_evermanni:12.7444,Pisodonophis_cancrivorus:12.7444):12.4121):2.12772):1.23521,(Ophichthus_puncticeps:23.6152,(Ophichthus_rex:22.6247,((Ophisurus_macrorhynchos:14.8987,Xyrias_revulsus:14.8987):7.61057,Brachysomophis_crocodilinus:22.5093):0.115459):0.990435):4.90417):3.65533,(Ophichthus_serpentinus:32.0427,(Echiophis_punctifer:28.3002,(Ophichthus_triserialis:19.3115,(Ophichthus_gomesii:8.04831,Ophichthus_zophochir:8.04831):11.2632):8.98866):3.74248):0.132004):11.2901):21.2199):8.01963):1.99562,(Parabathymyrus_macrophthalmus:72.6272,(((((Venefica_proboscidea:31.0505,Conger_conger:31.0505):16.1371,Facciolella_gilbertii:47.1876):17.1919,Hoplunnis_tenuis:64.3795):0.109375,(((((Gnathophis_nystromi_ginanago:20.0734,Gnathophis_longicauda:20.0734):0.154055,Gnathophis_nystromi_nystromi:20.2274):34.5693,((Uroconger_syringinus:15.5459,Uroconger_lepturus:15.5459):24.409,(Bathyuroconger_vicinus:5.81239,Bathycongrus_retrotinctus:5.81239):34.1425):14.8418):0.156197,Rhynchoconger_flavus:54.9529):5.17919,(((((((Cynoponticus_ferox:24.8316,(Congresox_talabonoides:10.3282,(Muraenesox_bagio:4.49827,Muraenesox_cinereus:4.49827):5.82994):14.5034):7.20502,Oxyconger_leptognathus:32.0366):13.2431,Gavialiceps_taeniola:45.2797):1.80455,Xenomystax_congroides:47.0843):7.08215,(Saurenchelys_fierasfer:54.0516,(Conger_japonicus:49.9482,Macrocephenchelys_soela:49.9482):4.10331):0.114878):1.7756,Nettastoma_parviceps:55.942):1.3579,Nettastoma_melanurum:57.2999):2.83221):4.35675):5.16932,Ariosoma_major:69.6582):2.96903):2.07279):1.30326):5.55427):4.76502,(((Chilorhinus_platyrhynchus:8.54914,Chilorhinus_suensonii:8.54914):27.6885,Kaupichthys_hyoproroides:36.2376):18.9986,Kaupichthys_nuchalis:55.2362):31.0863):5.40147,(((Dysomma_anguillare:25.2148,(Synaphobranchus_affinis:2.20502,Synaphobranchus_kaupii:2.20502):23.0098):6.83258,(Histiobranchus_bathybius:8.39775,Simenchelys_parasitica:8.39775):23.6496):4.37405,(Ilyophis_brunneus:29.0896,Meadia_roseni:29.0896):7.33187):55.3026):6.09085,(Moringua_edwardsi:26.3994,Moringua_javanica:26.3994):71.4154):3.99967,(((((Enchelynassa_canina:39.4139,((Gymnothorax_moringa:0.864126,Gymnothorax_vicinus:0.864126):34.6512,Gymnothorax_unicolor:35.5153):3.89862):5.95876,((Muraena_robusta:29.1069,(Gymnothorax_ocellatus:13.8736,(Gymnothorax_saxicola:0.061901,Gymnothorax_melatremus:0.061901):13.8117):15.2333):7.2273,((Echidna_xanthospilos:11.4617,Gymnothorax_maderensis:11.4617):5.88952,Gymnothorax_bacalladoi:17.3512):18.983):9.03844):3.80145,(Rhinomuraena_quaesita:42.7902,((((Gymnothorax_minor:26.6595,Gymnothorax_albimarginatus:26.6595):5.81073,Strophidon_sathete:32.4703):5.53161,(Gymnothorax_afer:35.6563,(Enchelycore_anatina:31.8167,((Gymnothorax_pictus:12.4839,Gymnothorax_buroensis:12.4839):5.66506,Gymnothorax_miliaris:18.149):13.6677):3.83962):2.34555):4.10263,(((Echidna_leucotaenia:5.38445,Echidna_polyzona:5.38445):29.8005,((((Gymnothorax_fimbriatus:1.41592,(Gymnothorax_reticularis:1.17487,(Gymnothorax_eurostus:0.975763,Gymnothorax_javanicus:0.975763):0.199112):0.24105):0.359823,Gymnothorax_reevesii:1.77575):22.3378,(((Gymnothorax_margaritophorus:10.9935,Gymnothorax_prionodon:10.9935):2.27682,Gymnothorax_polygonius:13.2703):1.77777,((Gymnothorax_steindachneri:1.08086,(Gymnothorax_pseudothyrsoideus:0.948417,Gymnothorax_richardsonii:0.948417):0.132439):12.4282,Gymnothorax_kidako:13.509):1.53909):9.06547):3.81638,Gymnothorax_chilospilus:27.93):7.25499):5.91166,((((Gymnothorax_hepaticus:24.5236,(Gymnothorax_zonipectis:6.22674,(Gymnothorax_flavimarginatus:1.85581,Gymnothorax_meleagris:1.85581):4.37093):18.2968):4.57149,Gymnothorax_castaneus:29.0951):5.71629,((Gymnothorax_rueppellii:25.0202,(Gymnothorax_berndti:4.8925,(Gymnothorax_polyuranodon:1.28056,Gymnothorax_undulatus:1.28056):3.61194):20.1277):4.68995,(Gymnothorax_favagineus:0.744573,Gymnothorax_isingteena:0.744573):28.9656):5.1012):3.94212,(Gymnothorax_griseus:36.2716,(((Gymnothorax_prasinus:25.9503,Enchelycore_carychroa:25.9503):3.52975,Gymnomuraena_zebra:29.4801):4.94344,(Muraena_argus:21.6699,(Muraena_helena:18.0022,Muraena_melanotis:18.0022):3.66766):12.7536):1.84804):2.48192):2.34314):1.00787):0.685669):6.38395):5.04304,((Uropterygius_macrocephalus:28.8735,Scuticaria_tigrina:28.8735):0.109094,Uropterygius_micropterus:28.9826):25.2345):5.98892,Echidna_nebulosa:60.2061):41.6085):14.2215,(Halosauropsis_macrochir:94.2637,(((Notacanthus_abbotti:10.0512,Notacanthus_bonaparte:10.0512):29.6691,Polyacanthonotus_rissoanus:39.7202):0.173409,Notacanthus_chemnitzii:39.8937):54.37):21.7724):30.4946,(((Elops_affinis:13.3445,(Elops_saurus:8.62494,(Elops_smithi:4.38172,(Elops_machnata:2.07378,Elops_hawaiensis:2.07378):2.30794):4.24322):4.71954):82.6555,(Megalops_atlanticus:35.0639,Megalops_cyprinoides:35.0639):60.9361):35.784,(Albula_glossodonta:102.773,(Albula_vulpes:102.598,Pterothrissus_gissu:102.598):0.175984):29.0105):14.7467):58.336):14.3864):96.8818,(Amia_calva:284.0,((Atractosteus_spatula:8.04464,(Atractosteus_tropicus:7.80619,Atractosteus_tristoechus:7.80619):0.238449):92.2626,(Lepisosteus_platostomus:29.3046,((Lepisosteus_oculatus:1.5376,Lepisosteus_platyrhincus:1.5376):14.0126,Lepisosteus_osseus:15.5502):13.7544):71.0026):183.693):32.1348):28.8652);
end;
